# Supplementary material for: Novel T-cell signature based on cell pair algorithm predicts survival and immunotherapy response for patients with bladder urothelial carcinoma
Source: Front Immunol. 2022 Nov 17;13:994594. doi: 10.3389/fimmu.2022.994594 (PMC9712189; doi:10.3389/fimmu.2022.994594)
Supplement: Supplementary file 3 [file Table_1.xlsx]

## Sheet: Table S1
Table S1: Basic information of twenty-six included BLCA cohorts
Series accession numbers	Platform used	No. of samples	No. of patients	No. of normal	Survivval Information	References
E-MTAB-1803	Affymetrix GeneChip Human Genome U133 Plus 2.0	85	85		YES	PMID:24142880;PMID:25009231
E-MTAB-4321	Illumina RNAseq	476	476		YES	PMID: 27321955
GSE128959	Affymetrix Human Gene 1.0 ST Array	200	200		YES	PMID: 31609466
GSE134292	Illumina RNAseq	60	60		YES
GSE13507	Illumina human-6 v2.0 expression beadchip	175	165	10	YES	PMID: 20059769;PMID: 20421545
GSE154261	Illumina RNAseq	73	73		YES	PMID: 32684305
GSE163209	Affymetrix Human Transcriptome Array 2.0	217	217		YES	PMID: 35028613
GSE169455	Affymetrix Human Gene 1.0 ST Array	149	149		YES	PMID: 34782206
GSE19423	Illumina human-6 v2.0 expression beadchip	48	48		YES	PMID: 20233890
GSE3167	Affymetrix Human Genome U133A Array	60	51	9	YES	PMID: 15173019
GSE31684	Affymetrix Human Genome U133 Plus 2.0 Array	93	93		YES	PMID: 22228636;PMID: 24486590
GSE32548	Illumina HumanHT-12 V3.0 expression beadchip	131	131		YES	PMID: 22685613
GSE32894	Illumina HumanHT-12 V3.0 expression beadchip	308	308		YES	PMID: 22553347
GSE37817	Illumina human-6 v2.0 expression beadchip	24	18	6	YES	PMID: 23436614
GSE48075	Illumina HumanHT-12 V3.0 expression beadchip	142	142		YES	PMID: 24525232;PMID: 32546765
GSE48276	Illumina HumanHT-12 WG-DASL V4.0 R2 expression beadchip	116	116		YES	PMID: 24525232
GSE5287	Affymetrix Human Genome U133A Array	30	30		YES	PMID: 17671123
GSE69795	Illumina HumanHT-12 WG-DASL V4.0 R2 expression beadchip	61	61		YES	PMID: 26343003
GSE70691	Illumina HumanHT-12 WG-DASL V4.0 R2 expression beadchip	49	49		YES	PMID: 26343003
GSE83586	Affymetrix Human Gene 1.0 ST Array	59	59		YES	PMID: 28195647
GSE86411	Illumina HumanHT-12 WG-DASL V4.0 R2 expression beadchip	132	132		YES	PMID: 32546765
GSE93527	Affymetrix Human Transcriptome Array 2.0	79	79		YES	PMID: 29136510
IMvigor210	Affymetrix Human Genome U133 Plus 2.0 Array	221	221		YES	PMID: 29443960
MSKCC	Affymetrix Human Genome U133 Plus 2.0 Array	58	58		YES	PMID: 23897969
TCGA-BLCA	Affymetrix Human Genome U133A Array	427	408	19	YES

## Sheet: Table S2
Table S2: Multivariate Cox analysis for the 19 T cell types.
Cell types	References	HR	LCI	HCI	log_rank_p	fraction
T helper cells	PMID: 27855702	0.057	0.022	0.146	1e-07	35.614
CD8+ T cells	PMID: 27855702; PMID: 25822800	0.044	0.011	0.173	9e-06	19.736
Tfh cells	PMID: 27855702; PMID: 16339519; PMID: 16791882	0.189	0.058	0.618	0.006	7.586
Central memory CD4+ T cell	PMID: 28052254	3.845	1.428	10.354	0.008	7.103
Th-1 chemokines	PMID: 31863667	1.366	1.01	1.848	0.043	4.088
Th17 cells	PMID: 24138885; PMID: 24492460	0.654	0.433	0.988	0.044	4.07
Activated CD8+ T cell	PMID: 28052254; PMID: 15965501; PMID: 175251300; PMID: 24053356; PMID: 15075390; PMID: 19652199	0.32	0.104	0.984	0.047	3.954
Effector memeory CD4+ T cell	PMID: 28052254	2.433	0.934	6.339	0.069	3.312
Th1 cells	PMID: 24138885; PMID: 16339519; PMID: 14607935; PMID: 15789058	2.256	0.926	5.498	0.073	3.205
Effector memeory CD8+ T cell	PMID: 28052254	0.502	0.21	1.2	0.121	2.399
Th2 cells	PMID: 24138885; PMID: 16339519; PMID: 16702978; PMID: 14607935; PMID: 15789058	2.239	0.723	6.931	0.162	1.955
T_lymphocytes	PMID: 16704732	0.535	0.163	1.758	0.303	1.062
Cytotoxic cells	PMID: 27855702; PMID: 24138885	0.699	0.313	1.559	0.381	0.767
T cells CD4+ naive	PMID: 25822800; PMID: 16822306	2.115	0.39	11.47	0.385	0.753
Central memory CD8+ T cell	PMID: 28052254	1.624	0.528	5	0.398	0.715
Activated CD4+ T cell	PMID: 28052254; PMID: 15965501; PMID: 175251300; PMID: 24053356; PMID: 21632718; PMID: 19652199	1.267	0.688	2.333	0.448	0.575
T cells	PMID: 24138885	0.66	0.187	2.325	0.517	0.419
Tregs	PMID: 27855702; PMID: 16702978	0.808	0.102	6.402	0.84	0.041
Tgd cells	PMID: 24138885; PMID: 16339519; PMID: 21968650	0.991	0.813	1.208	0.93	0.008

## Sheet: Table S3
Table S3: The normalized enrichment scores for the 19 T cell types among 3134 BLCA patients.
	GSM1173903	GSM1167399	GSM786500	GSM1167455	GSM1173940	GSM340651.y	GSM340651	GSM340651.x	FR_259_U133_2.CEL	GSM1173906	GSM786533	GSM786548	GSM1167414	GSM786499	TCGA_2F_A9KR	GSM786557	GSM786491	GSM786502	GSM786531	TCGA_XF_A8HF	GSM340637	TCGA_XF_AAME	FR_127_U133_2_2.CEL	GSM786541	GSM786527	FR_267_U133_2.CEL	GSM786523	TCGA_UY_A78N	GSM786497	GSM340666.y	GSM340609	FR_252_U133_2.CEL	GSM340655.x	GSM1173921	GSM806829	GSM814087	GSM340644	GSM786543	GSM1173907	GSM1167433	GSM1167444	GSM1173922	GSM340659.x	GSM340664	GSM1173918	GSM806820	TCGA_XF_A9SL	GSM786564	GSM340638.x
Activated CD4+ T cell	0.0436659	-0.0223764	0.213323	0.276516	0.173811	-0.0177329	-0.00963153	0.051699	0.253919	-0.0678675	0.196794	0.0826418	0.119575	-0.0893682	-0.31546	0.156545	-0.0248861	0.221268	0.120081	0.0363567	-0.00749475	0.167349	0.00801105	-0.114743	0.171414	0.141567	-0.221492	0.0882002	0.26995	-0.0977949	-0.136108	-0.0186707	0.115308	0.0744544	-0.102079	-0.120924	-0.0813765	0.194034	-0.00656008	0.12137	0.116094	0.106223	0.150851	-0.0472516	0.0860778	0.123434	0.121579	0.225301	-0.156271
Activated CD8+ T cell	-0.00749446	-0.0537134	0.148283	0.197295	-0.0482107	-0.0915675	-0.164079	-0.114419	0.00728872	-0.104405	0.109537	2.92035e-07	-0.0532576	-0.101868	-0.17296	-0.0368829	0.0225041	0.0139902	-0.118148	-0.0211839	-0.0304187	0.0885604	0.0216076	-0.12602	-0.0706711	0.0606647	-0.204642	-0.185562	0.209246	-0.084981	-0.136939	-0.0562711	-0.0466865	0.083398	-0.175115	-0.188471	-0.0616568	0.0631281	-0.100922	0.00628777	0.122622	0.0621337	0.0629014	-0.011532	-0.0791214	0.0577909	0.056399	-0.0219858	-0.12072
CD8+ T cells	0.0298245	-0.0157796	0.0171264	0.0356545	0.0428481	-0.000258474	-0.00903714	0.020355	-0.0101197	0.0643475	0.129056	0.0837454	0.050787	-0.0947317	0.0502301	0.0341668	0.0228521	0.0103856	0.0272941	0.057378	0.0763826	0.0142201	-0.0560689	0.0198551	0.0327302	0.0307588	0.00369138	0.018147	0.0699585	0.00328307	-0.0496491	0.0447778	-0.0323889	0.0337712	0.00161777	-0.00263423	0.0250545	0.000555373	0.00965341	0.0451362	0.0114259	0.0516582	0.0668323	0.0174183	0.0345162	-0.0493258	0.0369282	0.0147048	-0.021615
Central memory CD4+ T cell	0.245771	0.220476	0.185534	0.26439	0.20868	-0.0119897	0.152346	0.249579	0.110108	0.261453	0.143311	0.103628	0.254424	0.102703	0.120527	0.250031	0.164924	0.104341	0.169798	0.0662444	0.161578	0.237543	0.240228	0.119466	0.196172	0.262133	0.237021	0.00809872	0.235975	-0.0103562	0.0808589	0.276872	0.119029	0.212667	0.149143	0.161056	0.153474	0.309463	0.218666	0.225554	0.159622	0.258584	0.13384	0.0682767	0.215838	0.194766	0.19551	0.0940262	0.0817203
Central memory CD8+ T cell	0.17528	0.0337697	0.162992	0.0778778	0.154726	0.0405602	0.0503185	0.0912374	0.0535575	0.0925686	0.161811	0.126153	0.119105	0.108193	0.0758888	0.110656	0.148226	0.21451	0.126517	0.0546329	0.0116871	0.168405	0.152938	0.00361121	0.0258744	0.222576	0.094609	-0.0594255	0.238062	0.0550448	0.0116012	0.0115681	-0.0164198	0.159753	-0.025485	-0.0547514	0.0353093	0.248859	0.0718785	-0.0172501	0.129701	0.0947161	0.140356	0.0559347	0.0792308	0.159472	0.190717	0.0772883	0.0737727
Cytotoxic cells	-0.00726178	-0.0037911	0.0774973	-0.0151206	0.0270803	-0.066262	-0.280428	-0.200232	-0.193257	-0.0733926	-0.0513893	-0.0395277	-0.0203464	-0.12752	-0.0903145	-0.133489	-0.0329046	0.0659677	0.0286767	-0.0639072	-0.107235	0.101692	0.1024	-0.00687126	-0.125005	0.0303751	-0.0477032	-0.170607	0.278545	-0.0422626	-0.290997	0.0458402	-0.240313	0.0546574	-0.0861815	-0.092861	-0.258053	0.0248123	-0.174163	-0.087865	-0.0239498	0.0300522	0.0456004	-0.0677264	0.110488	-0.0421231	0.108355	-0.239808	0.052839
Effector memeory CD4+ T cell	0.0122373	0.108323	0.108665	0.0777709	0.059865	0.10688	0.0427959	0.00923237	-0.0113136	0.087875	-0.0650547	0.0130372	0.0517874	-0.0335972	-0.0369899	-0.0301337	0.000618661	-0.0751854	0.04474	0.0109157	-0.0391918	0.103462	-0.0401944	-0.112807	-0.0302511	-0.05069	-0.0172757	0.135203	0.000360125	0.126887	0.0858924	0.0700266	0.131332	0.0116218	-0.0177709	-0.000234544	-0.0288069	-0.0616402	0.104617	0.0121435	-0.00273636	-0.0560252	0.0582156	0.0253796	-0.165947	0.102701	0.0694691	-0.0432544	0.064758
Effector memeory CD8+ T cell	0.0437058	0.140808	0.0949242	0.00341676	0.109174	0.0027379	0.00618297	0.046075	-0.140326	0.115553	0.126328	0.0368156	-0.0195525	-0.0410049	0.0903284	0.0324649	-0.0173056	-0.0178311	0.128235	0.0207486	0.0630109	0.162883	0.133313	0.17204	0.0596859	0.0984161	0.0952767	-0.106373	0.187526	0.00774117	0.0207081	0.112846	0.0970303	0.0749938	0.0421979	0.0203779	0.0825085	0.131332	0.0279979	-0.0196355	-0.0976561	0.0284877	0.035059	0.0574011	0.136829	0.0703717	0.0896953	-0.11187	0.118225
T cells	-0.0780478	-0.0402305	0.0648783	0.131672	-0.0823154	0.0353981	-0.233044	-0.32623	-0.106945	-0.187745	0.0509831	-0.0779764	-0.0133241	-0.242498	-0.0737162	-0.131278	-0.198179	-0.0251801	-0.0879175	-0.0646291	0.0027895	0.205541	-0.0498303	-0.057474	-0.0927472	0.0927356	-0.150609	-0.125772	0.27019	0.0129498	-0.0508068	-0.000639057	0.0414194	-0.00368938	-0.124538	-0.101372	0.00606954	-0.0176335	-0.256538	-0.056816	0.0248336	-0.115239	0.042914	0.0582099	-0.0766817	0.0217214	0.210965	-0.286187	-0.0151404
T cells CD4+ naive	-0.108294	-0.0357596	-0.057907	0.0654541	-0.0558834	0.0346538	-0.141568	-0.185243	-0.134341	-0.188193	0.022738	-0.045922	-0.0303362	-0.202026	-0.107739	-0.132316	-0.158005	-0.202657	0.0377018	-0.0382255	-0.125918	0.102251	-0.00247721	-0.0381531	-0.105991	0.087718	-0.0684398	-0.0875195	0.141268	0.0403717	-0.204044	0.0142719	-0.130551	-0.0501194	-0.112243	-0.106053	-0.162441	-0.0481328	-0.12141	-0.0308873	-0.0162641	-0.148939	-0.0707001	-0.0139753	-0.104263	-0.0252125	0.137157	-0.169995	-0.0150402
T helper cells	0.0688636	0.0505351	0.14601	0.219893	0.0294948	-0.0483743	0.0472434	0.074417	0.168005	0.147029	0.065132	0.155326	0.193731	0.211865	0.0252562	0.198039	0.109064	0.13113	0.026374	0.0205104	0.163594	0.0263458	0.11075	0.133718	0.179598	0.0154436	0.0668185	0.113975	0.242739	-0.0434691	0.119602	0.158906	0.0656449	0.0476312	0.088232	0.111596	0.0988334	0.100722	0.0928929	0.132159	0.077718	0.0740778	0.0879377	0.0970654	0.154272	0.067914	0.0446884	0.12989	0.104847
T_lymphocytes	0.0509414	-0.0206903	-0.032675	0.138608	0.15314	0.0489003	-0.0234312	0.0314049	0.0279835	0.0678368	0.026763	0.0333694	0.0606271	0.0896354	-0.0416858	-0.080474	-0.0522765	0.107478	0.0696676	-0.0343993	0.0318399	0.100431	0.0778556	0.00874008	-0.00270214	0.0615873	-0.0505648	0.0873059	0.222527	0.055949	0.0229216	0.0599271	0.0115911	0.157	0.107708	0.100707	-0.0274611	-0.0457249	0.109684	0.093681	0.106507	0.033735	0.00640156	0.0432285	0.0160853	0.0290866	0.112561	0.0384552	-0.041526
Tfh cells	0.0467777	-0.048126	-0.0314059	-0.00565375	-0.0089823	0.0528989	-0.00558251	-0.0235145	0.0195163	-0.0812655	-0.0492519	0.0178614	0.0395792	-0.122802	0.0161844	-0.137752	-0.121333	-0.0629372	0.0432485	-0.0605408	-0.0164751	-0.0103317	-0.0818178	0.0183298	-0.0252893	-0.0216207	-0.0543496	0.0249674	-0.0255759	0.044635	0.0627578	-0.0473358	-0.0873089	-0.0280766	-0.0305164	-0.0140717	-0.0635023	-0.144799	-0.0565221	-0.0787576	-0.00690862	-0.146504	-0.109872	-0.0407786	-0.206091	-0.07037	0.0339541	-0.0327889	-0.0453269
Tgd cells	-0.379318	0.355926	-0.47072	0.163052	-0.488536	0.459876	0.446708	0.411541	-0.0567777	-0.421766	0.407049	-0.293493	0.0183579	-0.460031	-0.436483	0.439892	-0.438652	-0.436483	0.181952	0.353447	-0.238342	0.427188	-0.437878	-0.36615	0.321224	-0.334237	-0.384895	0.380248	-0.250426	0.245624	-0.412626	0.400387	0.437258	-0.454764	-0.477537	-0.447947	-0.366615	0.215105	-0.399148	0.324942	-0.395275	-0.448102	-0.339659	0.146011	0.096127	-0.485902	0.38505	0.456778	-0.349729
Th-1 chemokines	0.263371	-0.0618467	0.457321	0.471392	0.0290965	-0.406637	-0.477465	-0.435374	-0.14584	-0.466115	0.242692	-0.0511612	0.163426	-0.484692	-0.470884	0.359731	-0.0908401	0.296225	0.154579	-0.383928	0.084573	0.154975	0.192596	-0.351087	-0.476213	0.337808	0.128741	-0.468928	0.472646	-0.395527	-0.4111	0.32487	-0.421032	0.343678	-0.490777	-0.47722	-0.20021	0.403299	0.31364	-0.371244	0.444546	0.418952	0.143491	-0.462944	-0.000435379	0.317857	-0.0837725	-0.465958	-0.449205
Th1 cells	0.031484	0.115738	-0.0659251	-0.00133629	0.0540353	0.0108588	-0.0803132	0.0353934	-0.0761715	0.100173	-0.0243645	-0.0758947	0.0517827	-0.0720401	0.0584297	0.0312899	0.0539254	-0.108224	0.171745	-0.0258483	-0.0200435	0.102487	0.045464	0.0637408	0.0949627	0.00339096	0.108894	-0.0447396	-0.00968934	-0.0570583	-0.0989387	0.0641339	0.0528395	-0.0266385	-0.0717643	-0.096402	-0.0875274	0.0425058	0.0269824	-0.0590044	-0.0401794	0.0172795	-0.0468929	-0.00284445	0.000399205	0.0744689	0.0286006	-0.150469	-0.0511791
Th17 cells	0.0758991	-0.344595	-0.16791	-0.0455214	-0.104274	0.237467	0.209173	0.0839047	-0.0689206	0.260476	0.0248993	-0.218077	0.222525	-0.313231	0.229046	0.0079424	-0.135395	-0.013723	0.0372287	-0.350856	-0.0632361	0.138189	0.0176644	-0.029801	-0.12798	0.12127	-0.0606677	-0.353934	0.0729756	0.271301	-0.0663401	0.113408	-0.21008	0.0761757	0.15938	0.174345	0.175792	0.11875	0.093378	-0.300986	-0.0584164	0.0983456	0.205331	0.101417	-0.264882	0.0128957	-0.19247	-0.0764152	0.102647
Th2 cells	-0.105887	0.0257841	0.122293	0.00657618	0.0523097	0.0838285	-0.0370812	-0.010015	0.0320026	0.00781819	-0.104807	0.0535924	0.000384579	0.048972	0.0120012	-0.0522922	0.0432628	0.0253214	0.0854427	-0.00517409	0.0246176	0.0228118	0.045991	0.0232648	0.0118376	0.00878705	0.0403217	0.2105	0.00483868	0.115423	0.114883	0.101591	0.0671232	0.0328432	0.0617678	0.0524053	-0.0655525	-0.0307645	0.0952871	0.170807	0.0949285	-0.010791	-0.109876	0.112743	-0.0377852	-0.023859	-1.43525e-05	0.0422457	-0.0187576
Tregs	-0.0894283	-0.0827125	-0.0180851	0.0516576	-0.0153861	0.0423455	-0.180582	-0.243069	-0.119941	-0.152	-0.0122066	-0.0511863	-0.0286019	-0.198907	-0.0350587	-0.14657	-0.154169	-0.161557	-0.00263479	-0.0881246	-0.0215991	0.131487	-0.0159674	-0.0358997	-0.0804088	0.0839955	-0.0701673	-0.167152	0.127171	0.0439399	-0.101646	-0.00760199	-0.11453	-0.0656171	-0.100805	-0.0891346	-0.0766311	-0.0498926	-0.161397	-0.107175	0.00810732	-0.1228	-0.0358815	-0.023194	-0.0976039	-0.0337583	0.0985819	-0.20883	-0.0756536
[truncated: 3,085 more columns]

## Sheet: Table S4
Table S4: Details about the T cell pairs (TCPs).
T cell pair	T cell a	T cell b	log_rank_p	fwer
P48	CD8+ T cells	Th1 cells	1.63203e-14	2.79077e-12
P37	CD8+ T cells	Central memory CD8+ T cell	6.43263e-12	1.09998e-09
P39	CD8+ T cells	Effector memeory CD4+ T cell	1.17384e-10	2.00726e-08
P50	CD8+ T cells	Th2 cells	2.90233e-09	4.96299e-07
P36	CD8+ T cells	Central memory CD4+ T cell	8.17708e-09	1.39828e-06
P90	Cytotoxic cells	Th1 cells	1.45912e-08	2.4951e-06
P72	Central memory CD8+ T cell	T helper cells	2.53193e-08	4.3296e-06
P153	Tfh cells	Th1 cells	3.53951e-08	6.05256e-06
P155	Tfh cells	Th2 cells	3.9819e-08	6.80905e-06
P168	Th1 cells	Tregs	4.87238e-08	8.33176e-06
P144	T_lymphocytes	Tfh cells	1.19954e-07	2.05122e-05
P80	Central memory CD8+ T cell	Tregs	1.97798e-07	3.38235e-05
P123	T cells	Th1 cells	3.97492e-07	6.79711e-05
P55	Central memory CD4+ T cell	Effector memeory CD8+ T cell	4.16455e-07	7.12137e-05
P8	Activated CD4+ T cell	T cells	5.17385e-07	8.84729e-05
P142	T helper cells	Th2 cells	5.27553e-07	9.02116e-05
P12	Activated CD4+ T cell	Tfh cells	7.81648e-07	0.000133662
P69	Central memory CD8+ T cell	Effector memeory CD8+ T cell	1.19596e-06	0.000204509
P58	Central memory CD4+ T cell	T helper cells	1.36077e-06	0.000232691
P99	Effector memeory CD4+ T cell	Tfh cells	1.39041e-06	0.00023776
P5	Activated CD4+ T cell	Cytotoxic cells	3.62814e-06	0.000620411
P166	Th1 cells	Th17 cells	3.89503e-06	0.00066605
P122	T cells	Th-1 chemokines	4.63011e-06	0.000791749
P44	CD8+ T cells	T_lymphocytes	7.24565e-06	0.00123901
P132	T cells CD4+ naive	Th1 cells	1.07762e-05	0.00184273
P74	Central memory CD8+ T cell	Tfh cells	1.16494e-05	0.00199205
P97	Effector memeory CD4+ T cell	T helper cells	2.07033e-05	0.00354026
P71	Central memory CD8+ T cell	T cells CD4+ naive	2.44594e-05	0.00418256
P2	Activated CD4+ T cell	CD8+ T cells	2.48759e-05	0.00425378
P25	Activated CD8+ T cell	T cells	3.2308e-05	0.00552467
P113	Effector memeory CD8+ T cell	Th1 cells	3.34867e-05	0.00572622
P89	Cytotoxic cells	Th-1 chemokines	4.05705e-05	0.00693756
P56	Central memory CD4+ T cell	T cells	4.50149e-05	0.00769755
P105	Effector memeory CD4+ T cell	Tregs	6.67986e-05	0.0114226
P9	Activated CD4+ T cell	T cells CD4+ naive	7.66651e-05	0.0131097
P140	T helper cells	Th1 cells	8.66931e-05	0.0148245
P78	Central memory CD8+ T cell	Th17 cells	0.000103056	0.0176226
P18	Activated CD4+ T cell	Tregs	0.000110333	0.0188669
P70	Central memory CD8+ T cell	T cells	0.000114196	0.0195275
P94	Effector memeory CD4+ T cell	Effector memeory CD8+ T cell	0.000146315	0.0250198
P152	Tfh cells	Th-1 chemokines	0.000176977	0.0302631
P136	T helper cells	T_lymphocytes	0.000189227	0.0323578
P53	Central memory CD4+ T cell	Cytotoxic cells	0.000194186	0.0332059
P66	Central memory CD4+ T cell	Tregs	0.000215882	0.0369158
P165	Th-1 chemokines	Tregs	0.000272629	0.0466196
P169	Th17 cells	Th2 cells	0.000307149	0.0525224
P131	T cells CD4+ naive	Th-1 chemokines	0.000317959	0.054371
P67	Central memory CD8+ T cell	Cytotoxic cells	0.000343994	0.058823
P95	Effector memeory CD4+ T cell	T cells	0.000351564	0.0601174
P16	Activated CD4+ T cell	Th17 cells	0.000361822	0.0618716
P47	CD8+ T cells	Th-1 chemokines	0.000404526	0.0691739
P117	T cells	T cells CD4+ naive	0.000441535	0.0755025
P92	Cytotoxic cells	Th2 cells	0.000463104	0.0791909
P163	Th-1 chemokines	Th17 cells	0.000537107	0.0918453
P32	Activated CD8+ T cell	Th1 cells	0.000612994	0.104822
P60	Central memory CD4+ T cell	Tfh cells	0.000624075	0.106717
P125	T cells	Th2 cells	0.000808075	0.138181
P31	Activated CD8+ T cell	Th-1 chemokines	0.0009095	0.155525
P81	Cytotoxic cells	Effector memeory CD4+ T cell	0.00109484	0.187217
P1	Activated CD4+ T cell	Activated CD8+ T cell	0.00115004	0.196657
P59	Central memory CD4+ T cell	T_lymphocytes	0.00124056	0.212136
P147	T_lymphocytes	Th1 cells	0.00127385	0.217828
P57	Central memory CD4+ T cell	T cells CD4+ naive	0.00131478	0.224828
P63	Central memory CD4+ T cell	Th1 cells	0.00137082	0.23441
P148	T_lymphocytes	Th17 cells	0.00143612	0.245576
P112	Effector memeory CD8+ T cell	Th-1 chemokines	0.00251618	0.430266
P135	T cells CD4+ naive	Tregs	0.00301379	0.515358
P22	Activated CD8+ T cell	Cytotoxic cells	0.00346967	0.593313
P21	Activated CD8+ T cell	Central memory CD8+ T cell	0.00351439	0.60096
P103	Effector memeory CD4+ T cell	Th17 cells	0.00353193	0.60396
P171	Th2 cells	Tregs	0.00451381	0.771861
P96	Effector memeory CD4+ T cell	T cells CD4+ naive	0.00498581	0.852574
P64	Central memory CD4+ T cell	Th17 cells	0.00522245	0.893039
P3	Activated CD4+ T cell	Central memory CD4+ T cell	0.244603	1
P4	Activated CD4+ T cell	Central memory CD8+ T cell	0.557222	1
P6	Activated CD4+ T cell	Effector memeory CD4+ T cell	0.307892	1
P7	Activated CD4+ T cell	Effector memeory CD8+ T cell	0.0305762	1
P10	Activated CD4+ T cell	T helper cells	0.0420356	1
P11	Activated CD4+ T cell	T_lymphocytes	0.0315523	1
P13	Activated CD4+ T cell	Tgd cells	0.210061	1
P14	Activated CD4+ T cell	Th-1 chemokines	0.0323896	1
P15	Activated CD4+ T cell	Th1 cells	0.581773	1
P17	Activated CD4+ T cell	Th2 cells	0.616643	1
P19	Activated CD8+ T cell	CD8+ T cells	0.0932994	1
P20	Activated CD8+ T cell	Central memory CD4+ T cell	0.0070498	1
P23	Activated CD8+ T cell	Effector memeory CD4+ T cell	0.0110382	1
P24	Activated CD8+ T cell	Effector memeory CD8+ T cell	0.677644	1
P26	Activated CD8+ T cell	T cells CD4+ naive	0.0202851	1
P27	Activated CD8+ T cell	T helper cells	0.0669295	1
P28	Activated CD8+ T cell	T_lymphocytes	0.962626	1
P29	Activated CD8+ T cell	Tfh cells	0.0585988	1
P30	Activated CD8+ T cell	Tgd cells	0.00669205	1
P33	Activated CD8+ T cell	Th17 cells	0.0239286	1
P34	Activated CD8+ T cell	Th2 cells	0.126608	1
P35	Activated CD8+ T cell	Tregs	0.0112481	1
P38	CD8+ T cells	Cytotoxic cells	0.261772	1
P40	CD8+ T cells	Effector memeory CD8+ T cell	0.0274596	1
P41	CD8+ T cells	T cells	0.295117	1
P42	CD8+ T cells	T cells CD4+ naive	0.145962	1
P43	CD8+ T cells	T helper cells	0.996136	1
P45	CD8+ T cells	Tfh cells	0.283381	1
P46	CD8+ T cells	Tgd cells	0.00938595	1
P49	CD8+ T cells	Th17 cells	0.971493	1
P51	CD8+ T cells	Tregs	0.0990486	1
P52	Central memory CD4+ T cell	Central memory CD8+ T cell	0.292778	1
P54	Central memory CD4+ T cell	Effector memeory CD4+ T cell	0.284427	1
P61	Central memory CD4+ T cell	Tgd cells	0.895949	1
P62	Central memory CD4+ T cell	Th-1 chemokines	0.81214	1
P65	Central memory CD4+ T cell	Th2 cells	0.0382373	1
P68	Central memory CD8+ T cell	Effector memeory CD4+ T cell	0.195628	1
P73	Central memory CD8+ T cell	T_lymphocytes	0.0131067	1
P75	Central memory CD8+ T cell	Tgd cells	0.509502	1
P76	Central memory CD8+ T cell	Th-1 chemokines	0.920413	1
P77	Central memory CD8+ T cell	Th1 cells	0.600566	1
P79	Central memory CD8+ T cell	Th2 cells	0.148148	1
P82	Cytotoxic cells	Effector memeory CD8+ T cell	0.0600296	1
P83	Cytotoxic cells	T cells	0.724678	1
P84	Cytotoxic cells	T cells CD4+ naive	0.00934974	1
P85	Cytotoxic cells	T helper cells	0.628908	1
P86	Cytotoxic cells	T_lymphocytes	0.0506834	1
P87	Cytotoxic cells	Tfh cells	0.865908	1
P88	Cytotoxic cells	Tgd cells	0.00694946	1
P91	Cytotoxic cells	Th17 cells	0.666564	1
P93	Cytotoxic cells	Tregs	0.48069	1
P98	Effector memeory CD4+ T cell	T_lymphocytes	0.0860659	1
P100	Effector memeory CD4+ T cell	Tgd cells	0.146757	1
P101	Effector memeory CD4+ T cell	Th-1 chemokines	0.0186287	1
P102	Effector memeory CD4+ T cell	Th1 cells	0.0526149	1
P104	Effector memeory CD4+ T cell	Th2 cells	0.735873	1
P106	Effector memeory CD8+ T cell	T cells	0.242186	1
P107	Effector memeory CD8+ T cell	T cells CD4+ naive	0.295773	1
P108	Effector memeory CD8+ T cell	T helper cells	0.0143577	1
P109	Effector memeory CD8+ T cell	T_lymphocytes	0.225039	1
P110	Effector memeory CD8+ T cell	Tfh cells	0.370168	1
P111	Effector memeory CD8+ T cell	Tgd cells	0.0444798	1
P114	Effector memeory CD8+ T cell	Th17 cells	0.611856	1
P115	Effector memeory CD8+ T cell	Th2 cells	0.00904493	1
P116	Effector memeory CD8+ T cell	Tregs	0.42455	1
P118	T cells	T helper cells	0.089513	1
P119	T cells	T_lymphocytes	0.10793	1
P120	T cells	Tfh cells	0.0941752	1
P121	T cells	Tgd cells	0.00871273	1
P124	T cells	Th17 cells	0.712758	1
P126	T cells	Tregs	0.0415128	1
P127	T cells CD4+ naive	T helper cells	0.993137	1
P128	T cells CD4+ naive	T_lymphocytes	0.104038	1
P129	T cells CD4+ naive	Tfh cells	0.47994	1
P130	T cells CD4+ naive	Tgd cells	0.0261934	1
P133	T cells CD4+ naive	Th17 cells	0.439682	1
P134	T cells CD4+ naive	Th2 cells	0.018864	1
P137	T helper cells	Tfh cells	0.307532	1
P138	T helper cells	Tgd cells	0.00818757	1
P139	T helper cells	Th-1 chemokines	0.0729886	1
P141	T helper cells	Th17 cells	0.177109	1
P143	T helper cells	Tregs	0.377392	1
P145	T_lymphocytes	Tgd cells	0.0314225	1
P146	T_lymphocytes	Th-1 chemokines	0.0561896	1
P149	T_lymphocytes	Th2 cells	0.126679	1
P150	T_lymphocytes	Tregs	0.0108497	1
P151	Tfh cells	Tgd cells	0.0116304	1
P154	Tfh cells	Th17 cells	0.425221	1
P156	Tfh cells	Tregs	0.307832	1
P157	Tgd cells	Th-1 chemokines	0.586846	1
P158	Tgd cells	Th1 cells	0.213639	1
P159	Tgd cells	Th17 cells	0.16756	1
P160	Tgd cells	Th2 cells	0.173674	1
P161	Tgd cells	Tregs	0.0232289	1
P162	Th-1 chemokines	Th1 cells	0.0418165	1
P164	Th-1 chemokines	Th2 cells	0.0321436	1
P167	Th1 cells	Th2 cells	0.012787	1
P170	Th17 cells	Tregs	0.758728	1

## Sheet: Table S5
Table S5: Model information about the TCRPI.
T cell pair	T cell a	T cell b	Coefficient	Pvalue
P14	Activated CD4+ T cell	Th-1 chemokines	0.259032	0.0831076
P23	Activated CD8+ T cell	Effector memeory CD4+ T cell	0.385235	0.023297
P30	Activated CD8+ T cell	Tgd cells	0.246699	0.0670609
P36	CD8+ T cells	Central memory CD4+ T cell	1.22208	0.00227704
P39	CD8+ T cells	Effector memeory CD4+ T cell	0.31242	0.0326665
P55	Central memory CD4+ T cell	Effector memeory CD8+ T cell	-0.511226	0.0696949
P64	Central memory CD4+ T cell	Th17 cells	0.504482	0.00929898
P84	Cytotoxic cells	T cells CD4+ naive	0.19765	0.143255
P108	Effector memeory CD8+ T cell	T helper cells	-0.255323	0.11352
P117	T cells	T cells CD4+ naive	0.395576	0.017509
P123	T cells	Th1 cells	0.468792	0.0170339
P136	T helper cells	T_lymphocytes	0.386992	0.0134298
P166	Th1 cells	Th17 cells	-0.309751	0.0446535
P37	CD8+ T cells	Central memory CD8+ T cell	0.303793	0.126918

## Sheet: Table S6
Table S6: TCRPI score and clinical information for the 3134 BLCA patients.
Sample ID	Types	futime	fustat	Age	Gender	Stage	Grade	TCRPIscore	TCRPI group
GSM806926	Meta-testing cohort 1_1	3.37479	0	1	2	2	2	1.62444	high
BLCA_Nac_86	Meta-testing cohort 1_10	4.27397	0	2	1	3	2	1.54668	high
JMT1_66	Meta-testing cohort 1_100	3.9863	0	NA	NA	1	2	1.97416	high
GSM2454214	Meta-testing cohort 1_101	7.72603	1	2	2	0	2	0.648014	low
UCC14_primary	Meta-testing cohort 1_102	3.8589	1	1	1	3	NA	0.22608	low
GSM814229	Meta-testing cohort 1_103	4.73425	0	1	1	0	1	0.877173	low
U0585	Meta-testing cohort 1_104	3.31233	0	2	1	0	1	0.815569	low
GSM4974806	Meta-testing cohort 1_105	4.27397	0	NA	NA	0	1	0.193739	low
SAM3779e979db6b	Meta-testing cohort 1_106	0.108014	1	1	1	1	NA	1.12265	high
U1153	Meta-testing cohort 1_107	2.65479	0	2	1	0	1	0.427924	low
SAMa424c75831b4	Meta-testing cohort 1_108	0.291637	1	1	1	2	NA	0.34489	low
GSM2301904	Meta-testing cohort 1_109	5.05808	1	1	1	3	2	1.50934	high
GSM2301892	Meta-testing cohort 1_11	10.5855	0	2	2	2	2	0.692266	low
GSM4974693	Meta-testing cohort 1_110	4.93151	0	NA	NA	0	2	0.596732	low
JMT1_61	Meta-testing cohort 1_111	4.89041	1	NA	NA	1	2	2.10826	high
SAM7aa01fc49a80	Meta-testing cohort 1_112	0.175522	1	1	1	2	NA	3.27368	high
JMT1_26	Meta-testing cohort 1_113	5.45753	0	NA	NA	1	2	1.26814	high
GSM340679.y	Meta-testing cohort 1_114	6.01644	0	2	1	1	1	2.70828	high
U0618	Meta-testing cohort 1_115	3.13973	0	2	1	0	1	1.2693	high
GSM814322	Meta-testing cohort 1_116	1.24031	1	1	1	3	1	1.343	high
SAMe41b1e773582	Meta-testing cohort 1_117	0.070209	1	1	1	3	NA	1.35967	high
GSM1173957	Meta-testing cohort 1_118	2.63014	0	2	1	3	NA	0.705367	low
TCGA_ZF_AA4V	Meta-testing cohort 1_119	4.94795	0	2	1	3	2	0.471372	low
U0400	Meta-testing cohort 1_12	5.05479	0	2	1	1	2	0.376678	low
TCGA_G2_A2EF	Meta-testing cohort 1_120	5.16164	0	1	1	2	2	0.325751	low
GSM1709097	Meta-testing cohort 1_121	1.81479	0	1	NA	4	NA	2.10826	high
SAM3ee5dcd894f0	Meta-testing cohort 1_122	0.715592	1	1	1	1	NA	2.12671	high
GSM340726	Meta-testing cohort 1_123	2.76986	0	1	1	0	1	0.835186	low
TCGA_GC_A3OO	Meta-testing cohort 1_124	1.31781	0	2	1	2	2	1.62444	high
GSM3689151	Meta-testing cohort 1_125	0.000273973	0	NA	1	1	2	3.31888	high
GSM340740.y	Meta-testing cohort 1_126	1.45479	0	2	1	1	1	0.637133	low
GSM806831	Meta-testing cohort 1_127	8.06055	0	1	1	1	1	0.904233	low
TCGA_XF_A9T4	Meta-testing cohort 1_128	1.35616	1	1	1	4	2	1.88774	high
GSM119499	Meta-testing cohort 1_129	15.6164	0	NA	NA	3	NA	0.884403	low
GSM2301824	Meta-testing cohort 1_13	7.70712	0	1	1	1	1	5.19248	high
GSM4974801	Meta-testing cohort 1_130	3.45205	0	NA	NA	1	2	0.34489	low
JMT1_43	Meta-testing cohort 1_131	1.38904	0	NA	NA	1	2	0.735092	low
SAMd1bd63734394	Meta-testing cohort 1_132	0.15932	1	1	1	3	NA	1.64021	high
GSM814171	Meta-testing cohort 1_133	5.81242	0	2	2	1	1	0.115279	low
p1404_136_re.CEL	Meta-testing cohort 1_134	3.34532	0	NA	NA	2	2	2.57703	high
GSM1167335	Meta-testing cohort 1_135	4.93151	1	1	NA	3	NA	1.13843	high
GSM2301848	Meta-testing cohort 1_136	2.07205	1	2	1	3	2	0.340663	low
U0317	Meta-testing cohort 1_137	5.36712	0	2	2	0	1	0.542507	low
GSM3689053	Meta-testing cohort 1_138	1.00274	1	NA	1	2	2	1.2433	high
U0580	Meta-testing cohort 1_139	0.164384	0	1	1	1	2	2.75982	high
GSM3699751	Meta-testing cohort 1_14	1.31507	0	2	1	0	2	0.333578	low
GSM340713.y	Meta-testing cohort 1_140	4.29041	0	1	1	1	1	0.463912	low
SAM5b57e47fdcb3	Meta-testing cohort 1_141	0.31594	1	1	2	1	NA	1.05848	high
TCGA_HQ_A2OE	Meta-testing cohort 1_142	3.21644	0	NA	1	NA	NA	0.813093	low
GSM2454231	Meta-testing cohort 1_143	10.3562	1	1	1	0	2	2.73162	high
TCGA_ZF_AA5H	Meta-testing cohort 1_144	2.45753	0	1	2	4	2	1.02679	high
TCGA_DK_AA6L	Meta-testing cohort 1_145	3.1863	1	1	1	4	2	1.19885	high
GSM786545	Meta-testing cohort 1_146	5.36559	1	2	2	3	2	1.73509	high
U0502	Meta-testing cohort 1_147	3.85479	0	2	1	0	2	1.43423	high
GSM1167336	Meta-testing cohort 1_148	0.238356	0	2	NA	4	NA	2.86895	high
GSM71055	Meta-testing cohort 1_149	2.21918	0	NA	NA	0	1	2.89857	high
TCGA_GV_A3QF	Meta-testing cohort 1_15	1.69041	1	2	1	4	2	3.02072	high
U0514	Meta-testing cohort 1_150	0.090411	1	1	1	1	2	1.05268	high
GSM340608.x	Meta-testing cohort 1_151	2.21096	1	2	1	1	1	0.582756	low
TCGA_XF_A9SZ	Meta-testing cohort 1_152	2.35342	1	2	1	4	2	6.64531	high
U0307	Meta-testing cohort 1_153	4.92329	0	1	1	0	1	0.769863	low
GSM3699760	Meta-testing cohort 1_154	2.63014	0	2	2	0	1	1.42557	high
BLCA_Cx_280	Meta-testing cohort 1_155	9.53425	0	2	1	3	2	0.161349	low
UCC_EU2015_27	Meta-testing cohort 1_156	1.02411	1	2	1	0	NA	0.565831	low
GSM3699747	Meta-testing cohort 1_157	3.69863	0	1	2	0	2	1.62011	high
SAMae1690469964	Meta-testing cohort 1_158	1.73902	1	1	1	1	NA	0.804098	low
GSM4974690	Meta-testing cohort 1_159	4.93151	0	NA	NA	1	2	0.690253	low
TCGA_FJ_A3Z7	Meta-testing cohort 1_16	2.58904	0	2	1	4	2	0.211282	low
TCGA_BT_A20X	Meta-testing cohort 1_160	0.687671	1	1	1	4	2	2.34691	high
U0322	Meta-testing cohort 1_161	5.58082	0	1	1	0	1	0.316055	low
GSM4974704	Meta-testing cohort 1_162	0.986301	0	NA	NA	1	2	0.751274	low
U0129	Meta-testing cohort 1_163	2.42466	0	2	1	1	2	6.64531	high
GSM3699768	Meta-testing cohort 1_164	6.16438	0	1	2	0	2	1.09372	high
GSM814303	Meta-testing cohort 1_165	2.53196	0	1	1	0	2	2.00752	high
GSM1173973	Meta-testing cohort 1_166	0.780822	0	2	1	3	NA	0.395349	low
U1434	Meta-testing cohort 1_167	2.81096	0	2	1	0	1	0.173475	low
GSM4974822	Meta-testing cohort 1_168	1.31507	0	NA	NA	1	2	0.904233	low
BLCA_Nac_150	Meta-testing cohort 1_169	5.0137	0	1	2	2	2	0.535857	low
GSM1167466	Meta-testing cohort 1_17	2.49863	1	1	NA	2	NA	0.709395	low
SAMc97f35a29d16	Meta-testing cohort 1_170	0.0675087	0	1	1	2	NA	0.928711	low
GSM1173972	Meta-testing cohort 1_171	4.43836	1	1	1	0	NA	1.02679	high
GSM2301868	Meta-testing cohort 1_172	1.29616	1	2	1	4	2	1.1649	high
TCGA_DK_A3IT	Meta-testing cohort 1_173	1.77534	0	1	1	3	2	2.10826	high
GSM340736.y	Meta-testing cohort 1_174	2.88493	0	2	1	1	2	1.10214	high
BLCA_Cx_256	Meta-testing cohort 1_175	1.9726	1	1	1	3	2	1.88406	high
GSM3689173	Meta-testing cohort 1_176	7.98082	0	NA	1	1	2	1.62011	high
GSM3688995	Meta-testing cohort 1_177	1.8411	0	NA	1	1	2	1.43423	high
GSM1167354	Meta-testing cohort 1_178	8.70411	0	2	NA	2	NA	1.54527	high
JMT1_17	Meta-testing cohort 1_179	7.38082	0	NA	NA	1	2	1.07518	high
U1308	Meta-testing cohort 1_18	1.88219	0	1	2	0	1	0.17169	low
UCC_EU2015_33	Meta-testing cohort 1_180	3.18	0	2	2	3	NA	0.202843	low
GSM786509	Meta-testing cohort 1_181	2.57343	0	2	1	2	2	0.776658	low
GSM806918	Meta-testing cohort 1_182	4.05863	0	2	1	1	2	1.75021	high
GSM340753	Meta-testing cohort 1_183	1.74521	0	1	2	0	1	1.55139	high
GSM814086	Meta-testing cohort 1_184	5.62597	0	2	1	0	1	0.999074	low
FR_190_U133_2.CEL	Meta-testing cohort 1_185	4.43836	1	1	1	3	2	0.965657	low
GSM786527	Meta-testing cohort 1_186	7.49346	1	2	2	0	2	0.980958	low
GSM4974637	Meta-testing cohort 1_187	4.93151	0	NA	NA	1	2	2.10826	high
TCGA_FD_A43U	Meta-testing cohort 1_188	1.74247	0	2	1	4	2	1.08575	high
GSM340663.x	Meta-testing cohort 1_189	6.47123	0	2	1	1	2	1.35967	high
SAMe07c4560772d	Meta-testing cohort 1_19	0.172822	0	1	2	1	NA	2.10826	high
U1030	Meta-testing cohort 1_190	2.60548	0	2	2	1	1	1.54668	high
TCGA_BL_A5ZZ	Meta-testing cohort 1_191	1.03288	0	2	2	3	2	3.26058	high
GSM806830	Meta-testing cohort 1_192	2.66959	0	1	1	1	2	1.26591	high
JMT1_23	Meta-testing cohort 1_193	1.17534	0	NA	NA	1	2	1.13232	high
UCC_EU2015_59	Meta-testing cohort 1_194	1.15068	1	2	2	3	NA	0.466272	low
GSM3689079	Meta-testing cohort 1_195	0.000273973	0	NA	1	0	2	1.87419	high
GSM806835	Meta-testing cohort 1_196	2.42384	1	1	1	2	2	0.751274	low
JMT1_38	Meta-testing cohort 1_197	1.25753	0	NA	NA	1	2	0.084979	low
TCGA_ZF_AA4X	Meta-testing cohort 1_198	5.6	0	1	1	2	2	0.974273	low
U0074	Meta-testing cohort 1_199	3.12329	0	2	1	0	2	2.20398	high
U0062	Meta-testing cohort 1_2	1.07671	0	2	1	0	2	1.97944	high
GSM3689023	Meta-testing cohort 1_20	0.000273973	0	NA	1	1	2	0.626393	low
GSM814300	Meta-testing cohort 1_200	0.807956	1	1	1	2	2	1.87419	high
GSM340651.y	Meta-testing cohort 1_201	11.0959	1	2	1	1	1	0.463912	low
GSM806804	Meta-testing cohort 1_202	0.726575	1	2	1	2	1	2.82889	high
GSM3689018	Meta-testing cohort 1_203	1.04384	0	NA	1	1	1	0.639828	low
TCGA_ZF_A9R2	Meta-testing cohort 1_204	1.7589	0	2	1	2	2	1.4483	high
GSM1816537	Meta-testing cohort 1_205	14.9178	0	NA	NA	NA	NA	1.81664	high
BLCA_Cx_255	Meta-testing cohort 1_206	1.39726	1	1	1	3	2	0.705114	low
p1419_256.CEL	Meta-testing cohort 1_207	1.9726	1	NA	NA	2	2	1.73365	high
U0605	Meta-testing cohort 1_208	3.96986	0	1	1	0	1	0.476792	low
GSM806815	Meta-testing cohort 1_209	0.0887671	0	2	2	1	2	2.27756	high
U0114	Meta-testing cohort 1_21	3.13973	0	1	1	0	1	0.47763	low
U1413	Meta-testing cohort 1_210	2.50685	0	1	1	0	1	0.978099	low
JMT1_39	Meta-testing cohort 1_211	0.641096	0	NA	NA	1	2	1.99127	high
GSM786506	Meta-testing cohort 1_212	0.275435	1	2	1	3	2	1.4483	high
GSM1173915	Meta-testing cohort 1_213	6.50959	0	1	1	3	NA	1.86411	high
GSM2454221	Meta-testing cohort 1_214	11.589	0	2	1	0	2	0.551157	low
TCGA_E7_A7DU	Meta-testing cohort 1_215	0.0767123	0	2	1	3	1	0.648014	low
GSM2301784	Meta-testing cohort 1_216	2.74027	1	2	2	3	2	1.99283	high
GSM806879	Meta-testing cohort 1_217	6.18822	0	2	1	2	2	0.782934	low
SAM9fb814c22bdb	Meta-testing cohort 1_218	1.5716	1	1	2	3	NA	2.49351	high
UCC28_primary	Meta-testing cohort 1_219	4.0611	1	2	1	3	NA	0.141059	low
GSM1709089	Meta-testing cohort 1_22	1.50986	0	2	NA	3	NA	1.2693	high
GSM806862	Meta-testing cohort 1_220	7.05003	0	2	1	0	1	1.54256	high
GSM71032	Meta-testing cohort 1_221	4.93151	0	NA	NA	0	1	1.13167	high
U0071	Meta-testing cohort 1_222	3.36164	0	1	1	0	1	0.200282	low
GSM4974720	Meta-testing cohort 1_223	4.93151	0	NA	NA	0	1	0.488816	low
GSM340654	Meta-testing cohort 1_224	0.843836	1	1	1	3	2	1.31449	high
BLCA_Cx_143	Meta-testing cohort 1_225	0.0821918	1	2	1	3	2	2.75304	high
GSM1173939	Meta-testing cohort 1_226	3.13151	1	1	1	3	NA	1.81664	high
GSM814066	Meta-testing cohort 1_227	5.44492	0	2	1	0	1	1.96841	high
GSM4974769	Meta-testing cohort 1_228	4.93151	0	NA	NA	1	2	0.47763	low
JMT1_12	Meta-testing cohort 1_229	4.0274	0	NA	NA	1	2	1.62444	high
GSM4974844	Meta-testing cohort 1_23	2.38356	0	NA	NA	0	1	0.80503	low
GSM4974799	Meta-testing cohort 1_230	3.78082	0	NA	NA	1	2	2.86906	high
SAM7829a341b9f3	Meta-testing cohort 1_231	0.318641	1	1	1	4	NA	1.27499	high
UCC_EU2015_52	Meta-testing cohort 1_232	2.71397	0	2	2	2	NA	0.997493	low
GSM3689078	Meta-testing cohort 1_233	0.115068	0	NA	1	1	2	1.24615	high
BLCA_Nac_104	Meta-testing cohort 1_234	10.5205	0	1	2	3	2	0.72714	low
U0064	Meta-testing cohort 1_235	1.85753	0	2	1	0	2	0.233383	low
GSM71038	Meta-testing cohort 1_236	4.19178	0	NA	NA	1	2	2.10826	high
GSM1167451	Meta-testing cohort 1_237	2.28493	1	1	NA	2	NA	1.13511	high
GSM1173902	Meta-testing cohort 1_238	1.98904	0	1	1	3	NA	1.45277	high
U0475	Meta-testing cohort 1_239	3.34521	0	2	1	0	2	3.29228	high
GSM4974746	Meta-testing cohort 1_24	0.328767	0	NA	NA	0	1	0.920203	low
U0562	Meta-testing cohort 1_240	2.87671	0	1	2	0	1	0.124193	low
TCGA_DK_A3WY	Meta-testing cohort 1_241	13.6082	0	2	2	3	2	1.00199	low
GSM2301806	Meta-testing cohort 1_242	4.81808	1	2	1	1	2	0.536453	low
U0039	Meta-testing cohort 1_243	3.18082	0	1	2	0	2	1.49084	high
GSM2301902	Meta-testing cohort 1_244	1.22384	1	1	2	3	2	5.14789	high
GSM4974831	Meta-testing cohort 1_245	4.0274	0	NA	NA	1	2	0.685401	low
GSM1816522	Meta-testing cohort 1_246	16.1918	1	NA	NA	NA	NA	0.751274	low
GSM119495	Meta-testing cohort 1_247	6.24658	0	NA	NA	3	NA	1.92095	high
BLCA_Nac_42	Meta-testing cohort 1_248	1.31507	1	2	2	3	2	0.126074	low
GSM3689115	Meta-testing cohort 1_249	0.723288	0	NA	1	1	2	0.418203	low
GSM71056	Meta-testing cohort 1_25	4.52877	0	NA	NA	0	2	0.761943	low
GSM3689062	Meta-testing cohort 1_250	3.61644	1	NA	1	3	2	1.54617	high
GSM1709068	Meta-testing cohort 1_251	2.54384	0	2	NA	4	NA	1.8691	high
U0057	Meta-testing cohort 1_252	3.20548	0	2	1	0	1	0.877173	low
BLCA_Nac_2	Meta-testing cohort 1_253	5.09589	0	2	1	4	2	0.846258	low
SAM5fe7a81a39dd	Meta-testing cohort 1_254	1.40418	1	1	1	2	NA	0.470115	low
p1419_197.CEL	Meta-testing cohort 1_255	1.47945	1	NA	NA	2	2	2.24173	high
FR_32_U133_2.CEL	Meta-testing cohort 1_256	4.35616	0	2	1	3	2	1.343	high
BLCA_Nac_46	Meta-testing cohort 1_257	0.986301	1	2	1	3	2	0.466272	low
SAM2c9586161ce6	Meta-testing cohort 1_258	0.926219	1	1	1	1	NA	2.10212	high
GSM4974681	Meta-testing cohort 1_259	4.93151	0	NA	NA	1	2	1.38953	high
BLCA_Cx_197	Meta-testing cohort 1_26	1.47945	1	1	1	3	2	1.26591	high
GSM3689007	Meta-testing cohort 1_260	0.0575342	0	NA	2	1	2	1.04939	high
GSM1173907	Meta-testing cohort 1_261	5.99178	1	1	1	3	NA	2.95098	high
U1005	Meta-testing cohort 1_262	3.30411	0	1	1	0	1	0.294773	low
UCC_EU2015_6	Meta-testing cohort 1_263	10.5855	0	2	2	0	NA	0.289008	low
SAM36d87392593b	Meta-testing cohort 1_264	1.94695	0	1	1	3	NA	1.10214	high
GSM1167458	Meta-testing cohort 1_265	3.18082	1	2	NA	2	NA	3.49592	high
GSM2301835	Meta-testing cohort 1_266	2.12384	0	1	1	0	1	2.10826	high
GSM119727	Meta-testing cohort 1_267	22.6849	0	NA	NA	3	NA	1.50934	high
GSM340621.y	Meta-testing cohort 1_268	11.4082	0	1	1	1	1	1.09081	high
TCGA_BT_A0S7	Meta-testing cohort 1_269	0.547945	1	2	1	3	2	1.03859	high
UCC_EU2015_19	Meta-testing cohort 1_27	0.627945	1	1	2	3	NA	1.3502	high
TCGA_XF_AAMX	Meta-testing cohort 1_270	0.564384	1	2	2	3	2	3.25018	high
GSM3699756	Meta-testing cohort 1_271	0.0821918	0	2	1	0	2	2.94005	high
UCC8_primary_pelvis	Meta-testing cohort 1_272	7.97671	0	1	1	1	NA	0.27257	low
GSM814197	Meta-testing cohort 1_273	2.98593	0	2	1	0	2	1.07557	high
SAM47fc46c3d6be	Meta-testing cohort 1_274	1.5392	0	1	1	4	NA	1.48132	high
GSM119726	Meta-testing cohort 1_275	3.86301	0	NA	NA	3	NA	1.04764	high
GSM1173945	Meta-testing cohort 1_276	0.789041	0	2	2	3	NA	1.13167	high
SAM943df5cf15df	Meta-testing cohort 1_277	0.175522	1	1	1	3	NA	2.86895	high
GSM806928	Meta-testing cohort 1_278	2.70493	0	2	1	2	2	1.95172	high
FR_182_U133_2.CEL	Meta-testing cohort 1_279	1.23288	1	1	1	2	2	1.04939	high
GSM3699772	Meta-testing cohort 1_28	5.50685	0	2	1	0	2	1.14753	high
GSM4974633	Meta-testing cohort 1_280	0.575342	1	NA	NA	1	2	1.13366	high
TCGA_FJ_A3Z9	Meta-testing cohort 1_281	1.05479	1	2	1	NA	2	1.97944	high
GSM786537	Meta-testing cohort 1_282	1.39878	1	1	2	2	2	0.776658	low
SAM557dde1b9f3e	Meta-testing cohort 1_283	0.550871	1	1	1	1	NA	2.28734	high
GSM806888	Meta-testing cohort 1_284	5.84219	0	1	2	0	1	0.411076	low
U0645	Meta-testing cohort 1_285	0.246575	1	2	1	1	1	0.141311	low
GSM3689039	Meta-testing cohort 1_286	0.213699	0	NA	1	0	1	0.808598	low
GSM4974670	Meta-testing cohort 1_287	4.93151	0	NA	NA	0	1	0.625294	low
TCGA_XF_AAN8	Meta-testing cohort 1_288	0.323288	1	2	2	3	2	2.07903	high
GSM3689027	Meta-testing cohort 1_289	0.887671	0	NA	1	1	2	1.8691	high
BLCA_Nac_108	Meta-testing cohort 1_29	1.80822	1	1	1	3	2	1.4483	high
GSM1167473	Meta-testing cohort 1_290	1.38904	0	2	NA	2	NA	1.99127	high
U0195	Meta-testing cohort 1_291	3.01644	0	2	2	0	1	0.542507	low
GSM1816527	Meta-testing cohort 1_292	4.22466	0	NA	NA	NA	NA	2.69814	high
GSM786569	Meta-testing cohort 1_293	6.95069	0	2	2	3	2	1.11582	high
GSM806868	Meta-testing cohort 1_294	6.30164	0	2	1	2	2	0.420261	low
TCGA_H4_A2HQ	Meta-testing cohort 1_295	1.61644	0	1	2	4	2	1.13843	high
TCGA_ZF_A9R9	Meta-testing cohort 1_296	2.36712	1	1	1	4	2	2.73321	high
FR_96_U133_2.CEL	Meta-testing cohort 1_297	1.47945	0	1	2	3	2	0.944479	low
GSM340769	Meta-testing cohort 1_298	0.435616	0	1	1	2	2	4.51281	high
GSM786564	Meta-testing cohort 1_299	5.52761	1	2	1	3	2	0.985266	low
SAMe712352fb82a	Meta-testing cohort 1_3	1.81733	0	1	1	2	NA	1.1649	high
U0448	Meta-testing cohort 1_30	1.66027	0	2	2	1	2	0.49096	low
GSM340761	Meta-testing cohort 1_300	0.526027	1	2	1	3	2	5.14789	high
SAMf2ce197162ce	Meta-testing cohort 1_301	0.129617	1	1	1	4	NA	3.75264	high
TCGA_MV_A51V	Meta-testing cohort 1_302	1.12329	0	2	1	3	2	1.1908	high
FR_33_U133_2.CEL	Meta-testing cohort 1_303	3.20548	0	1	1	2	2	1.82932	high
BL103	Meta-testing cohort 1_304	3.13973	1	NA	NA	NA	NA	1.62011	high
U0256	Meta-testing cohort 1_305	2.05479	1	1	1	0	1	1.31926	high
FR_310_U133_2.CEL	Meta-testing cohort 1_306	7.06849	0	2	1	2	2	0.928711	low
SAMb15ad09d6e24	Meta-testing cohort 1_307	0.318641	1	1	2	4	NA	0.692897	low
U0614	Meta-testing cohort 1_308	3.85479	0	1	2	0	1	0.197773	low
U0142	Meta-testing cohort 1_309	3.83836	0	2	1	0	1	1.04633	high
SAMe97af0feefdf	Meta-testing cohort 1_31	0.912717	1	1	2	1	NA	1.09081	high
TCGA_UY_A8OB	Meta-testing cohort 1_310	5.77808	0	1	1	4	2	2.10283	high
GSM1709093	Meta-testing cohort 1_311	4.29863	1	1	NA	2	NA	1.1188	high
GSM1709085	Meta-testing cohort 1_312	5.08438	1	2	NA	4	NA	1.48392	high
GSM1816514	Meta-testing cohort 1_313	0.764384	0	NA	NA	NA	NA	1.73016	high
GSM1816550	Meta-testing cohort 1_314	8.24384	0	NA	NA	NA	NA	0.705367	low
GSM1173978	Meta-testing cohort 1_315	3.18082	1	2	1	0	NA	2.42174	high
TCGA_CU_A0YR	Meta-testing cohort 1_316	1.26027	1	2	1	4	2	1.11582	high
SAMb2e4a082541a	Meta-testing cohort 1_317	0.359146	1	1	2	4	NA	0.172229	low
GSM1173903	Meta-testing cohort 1_318	14.7945	1	1	1	3	NA	0.810178	low
TCGA_ZF_AA51	Meta-testing cohort 1_319	4.69589	0	2	2	2	2	1.3936	high
U0060	Meta-testing cohort 1_32	2.39178	0	2	1	0	1	0.835186	low
TCGA_FD_A6TH	Meta-testing cohort 1_320	0.358904	1	1	1	4	2	2.94005	high
U0378	Meta-testing cohort 1_321	3.44384	0	1	2	0	1	0.461476	low
p1404_143_re.CEL	Meta-testing cohort 1_322	0.0821918	1	NA	NA	2	2	3.76267	high
TCGA_DK_A1A5	Meta-testing cohort 1_323	0.178082	1	2	1	2	2	2.72366	high
GSM1167378	Meta-testing cohort 1_324	3.37808	1	2	NA	2	NA	2.75304	high
GSM806904	Meta-testing cohort 1_325	5.17973	0	2	1	1	2	0.810178	low
GSM4974725	Meta-testing cohort 1_326	4.93151	0	NA	NA	0	1	0.769863	low
GSM814325	Meta-testing cohort 1_327	1.1025	1	2	1	2	2	1.54668	high
GSM1816535	Meta-testing cohort 1_328	5.4	0	NA	NA	NA	NA	1.17159	high
GSM1173950	Meta-testing cohort 1_329	2.21096	1	2	1	3	NA	1.62011	high
TCGA_XF_AAMZ	Meta-testing cohort 1_33	3.69315	1	2	2	4	2	0.610195	low
TCGA_XF_AAML	Meta-testing cohort 1_330	0.635616	1	2	1	2	2	0.612053	low
BL100	Meta-testing cohort 1_331	1.28219	0	NA	NA	NA	NA	0.363804	low
GSM3689155	Meta-testing cohort 1_332	0.213699	0	NA	1	0	2	1.13167	high
TCGA_BT_A42C	Meta-testing cohort 1_333	2.39178	0	1	1	2	2	3.2782	high
GSM4974684	Meta-testing cohort 1_334	4.52055	0	NA	NA	1	2	0.481748	low
GSM786547	Meta-testing cohort 1_335	1.10714	1	2	1	3	2	4.02244	high
SAM203dcf14f927	Meta-testing cohort 1_336	1.5905	0	1	1	2	NA	0.841092	low
GSM340743.y	Meta-testing cohort 1_337	2.85205	0	2	1	1	1	2.34506	high
U1270	Meta-testing cohort 1_338	2.47397	0	1	1	0	1	0.547654	low
GSM814070	Meta-testing cohort 1_339	2.10231	0	2	2	2	2	0.778734	low
JMT1_65	Meta-testing cohort 1_34	4.28219	0	NA	NA	1	2	0.335402	low
U1283	Meta-testing cohort 1_340	1.52877	1	2	1	1	2	0.425382	low
U1288	Meta-testing cohort 1_341	2.11233	0	1	1	0	2	0.928711	low
GSM2301841	Meta-testing cohort 1_342	3.26055	0	1	1	1	2	3.49592	high
SAM415f36ad349e	Meta-testing cohort 1_343	1.47709	1	1	1	4	NA	1.73016	high
GSM3689066	Meta-testing cohort 1_344	7.26575	0	NA	2	1	2	0.590594	low
BL109	Meta-testing cohort 1_345	0.353425	0	NA	NA	NA	NA	2.69814	high
GSM806927	Meta-testing cohort 1_346	3.34521	0	2	2	2	2	1.52503	high
U0589	Meta-testing cohort 1_347	2.50685	0	2	2	0	2	0.264518	low
GSM1816530	Meta-testing cohort 1_348	5.98356	0	NA	NA	NA	NA	2.55787	high
TCGA_FT_A3EE	Meta-testing cohort 1_349	0.271233	1	2	2	3	2	1.87419	high
U1196	Meta-testing cohort 1_35	2.30959	0	2	1	0	1	0.646422	low
GSM786558	Meta-testing cohort 1_350	8.30086	0	2	2	1	1	0.877173	low
GSM340688.y	Meta-testing cohort 1_351	3.79726	0	2	1	1	1	1.96841	high
U0012	Meta-testing cohort 1_352	2.98356	0	2	2	0	1	1.15423	high
GSM3689118	Meta-testing cohort 1_353	4.60274	0	NA	1	1	2	0.861189	low
GSM4974847	Meta-testing cohort 1_354	4.27397	0	NA	NA	0	2	1.13511	high
SAM3f446449bf81	Meta-testing cohort 1_355	0.062108	1	1	1	1	NA	1.8583	high
TCGA_XF_A9SV	Meta-testing cohort 1_356	1.06301	1	2	1	4	2	1.2693	high
GSM814326	Meta-testing cohort 1_357	1.12141	0	2	1	0	1	1.02059	low
GSM806913	Meta-testing cohort 1_358	0.524384	1	2	1	2	2	0.800248	low
GSM340649	Meta-testing cohort 1_359	7.43562	0	1	1	1	1	2.69028	high
SAM1bcc62d8290c	Meta-testing cohort 1_36	1.5311	0	1	1	4	NA	0.354789	low
GSM814221	Meta-testing cohort 1_360	0.264815	0	2	1	0	1	0.590594	low
GSM340747	Meta-testing cohort 1_361	0.564384	1	2	1	4	1	1.32802	high
SAM45c8e6412c66	Meta-testing cohort 1_362	0.286237	1	1	1	3	NA	0.471372	low
U0384	Meta-testing cohort 1_363	2.63014	0	2	1	0	1	3.30771	high
GSM119711	Meta-testing cohort 1_364	2.46575	0	NA	NA	3	NA	1.343	high
TCGA_ZF_A9R7	Meta-testing cohort 1_365	1.82192	0	2	2	2	2	0.965514	low
U1338	Meta-testing cohort 1_366	2.02192	0	1	1	0	1	1.08213	high
GSM4974668	Meta-testing cohort 1_367	4.93151	0	NA	NA	1	2	0.19408	low
GSM4974699	Meta-testing cohort 1_368	0.739726	1	NA	NA	1	2	4.20901	high
GSM3689100	Meta-testing cohort 1_369	1.30685	0	NA	1	1	2	1.54668	high
U1232	Meta-testing cohort 1_37	2.67123	0	2	1	0	1	0.176139	low
p1404_66.CEL	Meta-testing cohort 1_370	2.28606	0	NA	NA	2	2	0.943628	low
TCGA_FD_A3N6	Meta-testing cohort 1_371	2.33151	0	1	2	2	2	1.49551	high
U0910	Meta-testing cohort 1_372	4.17534	0	2	1	1	2	1.10214	high
GSM786580	Meta-testing cohort 1_373	3.79939	0	2	1	2	2	1.62011	high
GSM3689147	Meta-testing cohort 1_374	1.09315	0	NA	1	0	1	2.40635	high
GSM3699755	Meta-testing cohort 1_375	11.8356	0	1	1	0	2	1.11582	high
BL114	Meta-testing cohort 1_376	0.40274	1	NA	NA	NA	NA	0.997493	low
BLCA_Cx_187	Meta-testing cohort 1_377	7.56164	0	2	1	2	2	0.129167	low
GSM4974744	Meta-testing cohort 1_378	4.93151	0	NA	NA	0	2	1.53999	high
GSM806932	Meta-testing cohort 1_379	2.21342	0	2	1	1	2	1.77992	high
BLCA_Nac_54	Meta-testing cohort 1_38	10.6027	0	1	2	3	2	0.461476	low
JMT1_84	Meta-testing cohort 1_380	8.87671	0	NA	NA	1	2	1.87287	high
U1025	Meta-testing cohort 1_381	3.30411	0	2	2	1	2	1.03768	high
GSM786543	Meta-testing cohort 1_382	6.52944	1	1	1	3	2	0.910543	low
GSM3689183	Meta-testing cohort 1_383	1.96438	0	NA	1	1	2	0.742065	low
p1419_248.CEL	Meta-testing cohort 1_384	2.63014	1	NA	NA	2	2	1.04764	high
GSM2301867	Meta-testing cohort 1_385	4.98247	0	1	1	1	2	2.21425	high
U1242	Meta-testing cohort 1_386	1.40548	0	2	1	0	2	0.246248	low
GSM814061	Meta-testing cohort 1_387	1.05386	0	2	1	0	1	1.62444	high
U0170	Meta-testing cohort 1_388	0.115068	0	1	2	3	2	0.840428	low
GSM4974708	Meta-testing cohort 1_389	4.93151	0	NA	NA	0	2	1.27688	high
GSM340731	Meta-testing cohort 1_39	0.758904	1	2	1	2	2	2.10212	high
GSM1167393	Meta-testing cohort 1_390	0.279452	0	2	NA	3	NA	0.987803	low
GSM3689013	Meta-testing cohort 1_391	3.50959	1	NA	1	4	2	2.10826	high
GSM1816526	Meta-testing cohort 1_392	17.7781	0	NA	NA	NA	NA	1.54256	high
FR_103_U133_2.CEL	Meta-testing cohort 1_393	4.43836	0	1	1	2	2	1.54668	high
GSM1167444	Meta-testing cohort 1_394	5.86849	1	2	NA	2	NA	0.843551	low
GSM786508	Meta-testing cohort 1_395	0.964023	1	1	1	3	2	0.928711	low
TCGA_GV_A40E	Meta-testing cohort 1_396	0.715068	1	2	1	2	2	6.25461	high
U0054	Meta-testing cohort 1_397	1.05205	0	2	2	0	1	1.22795	high
GSM340618	Meta-testing cohort 1_398	0.0849315	1	2	1	3	1	1.97944	high
FR_078_U133_2.CEL	Meta-testing cohort 1_399	1.72603	0	2	1	3	2	2.73162	high
U0144	Meta-testing cohort 1_4	3.82192	0	1	1	0	1	1.97416	high
SAM6662f5181f87	Meta-testing cohort 1_40	1.5851	0	1	1	1	NA	1.02912	high
U0654	Meta-testing cohort 1_400	3.29589	0	2	1	0	1	0.290719	low
GSM2301895	Meta-testing cohort 1_401	4.8937	0	2	1	3	2	0.854607	low
GSM806811	Meta-testing cohort 1_402	5.44521	0	2	1	0	1	1.96841	high
GSM806909	Meta-testing cohort 1_403	4.76959	0	1	1	2	2	1.86411	high
GSM4974679	Meta-testing cohort 1_404	2.87671	0	NA	NA	0	2	1.13167	high
TCGA_CU_A72E	Meta-testing cohort 1_405	1.13151	1	2	1	4	2	2.56151	high
U0128	Meta-testing cohort 1_406	2.65479	0	2	1	0	2	0.818599	low
GSM340715	Meta-testing cohort 1_407	3.20274	0	1	1	2	1	1.67395	high
TCGA_XF_AAN7	Meta-testing cohort 1_408	1.54795	1	1	1	4	2	1.62018	high
GSM340657.y	Meta-testing cohort 1_409	7.79178	0	2	1	1	1	0.839025	low
GSM2301860	Meta-testing cohort 1_41	4.23863	0	2	2	3	2	2.10826	high
p1404_68.CEL	Meta-testing cohort 1_410	4.62075	0	NA	NA	1	1	0.417591	low
SAM297c0301e861	Meta-testing cohort 1_411	0.664285	1	1	1	4	NA	2.84443	high
TCGA_FD_A3B6	Meta-testing cohort 1_412	2.75342	1	2	1	2	2	0.571183	low
GSM814064	Meta-testing cohort 1_413	6.24477	0	2	1	3	2	3.49592	high
GSM1173933	Meta-testing cohort 1_414	4.80822	1	2	2	2	NA	1.63851	high
UCC_EU2015_5	Meta-testing cohort 1_415	11.8085	0	2	1	0	NA	0.375501	low
GSM3699787	Meta-testing cohort 1_416	2.05479	0	2	2	0	1	0.810178	low
GSM3689010	Meta-testing cohort 1_417	0.000273973	0	NA	1	1	2	1.03859	high
GSM2301810	Meta-testing cohort 1_418	8.77397	0	1	1	1	2	1.09372	high
U1279	Meta-testing cohort 1_419	2.14521	0	1	2	0	1	0.625294	low
SAMbcb07ba81cee	Meta-testing cohort 1_42	0.207927	1	1	1	3	NA	0.144014	low
GSM1167377	Meta-testing cohort 1_420	4.23288	1	1	NA	3	NA	1.54527	high
SAM1f66db567eb5	Meta-testing cohort 1_421	1.36367	0	1	1	3	NA	1.60771	high
JMT1_63	Meta-testing cohort 1_422	1.94795	0	NA	NA	1	2	2.75982	high
GSM1816503	Meta-testing cohort 1_423	8.02192	1	NA	NA	NA	NA	0.702756	low
U0437	Meta-testing cohort 1_424	4.85753	0	1	1	0	1	0.290061	low
GSM1167346	Meta-testing cohort 1_425	0.649315	0	2	NA	2	NA	2.21425	high
GSM786511	Meta-testing cohort 1_426	2.02796	1	2	1	3	2	0.445212	low
GSM119731	Meta-testing cohort 1_427	3.0411	0	NA	NA	3	NA	1.47504	high
GSM806827	Meta-testing cohort 1_428	5.62603	0	2	1	0	1	1.42802	high
GSM1173921	Meta-testing cohort 1_429	6.75616	1	1	1	2	NA	0.655594	low
U1282	Meta-testing cohort 1_43	2.32603	0	1	1	0	1	0.0845055	low
GSM2454236	Meta-testing cohort 1_430	9.78082	1	2	1	0	1	1.62011	high
GSM3689073	Meta-testing cohort 1_431	4.20822	1	NA	1	1	2	1.54617	high
GSM4974739	Meta-testing cohort 1_432	4.60274	0	NA	NA	0	1	0.990236	low
GSM814175	Meta-testing cohort 1_433	2.76164	0	2	2	0	1	0.483837	low
BLCA_Cx_234	Meta-testing cohort 1_434	0.739726	1	1	1	3	2	1.58759	high
BLCA_Nac_5	Meta-testing cohort 1_435	5.50685	0	1	1	2	2	1.97416	high
GSM340693	Meta-testing cohort 1_436	4.6411	0	2	2	2	2	2.82064	high
GSM4974802	Meta-testing cohort 1_437	4.93151	0	NA	NA	0	1	0.369568	low
GSM3689083	Meta-testing cohort 1_438	0.000273973	0	NA	1	1	2	0.686607	low
TCGA_CU_A3QU	Meta-testing cohort 1_439	0.432877	0	1	1	4	2	0.234183	low
GSM340651.x	Meta-testing cohort 1_44	11.0932	1	2	1	1	1	1.4483	high
GSM1816513	Meta-testing cohort 1_440	5.7863	0	NA	NA	NA	NA	0.420261	low
U1052	Meta-testing cohort 1_441	2.17808	0	2	2	0	1	0.401775	low
GSM2301795	Meta-testing cohort 1_442	12.0132	0	1	2	0	1	2.56151	high
SAM1fa6bcb7fc48	Meta-testing cohort 1_443	1.86864	0	1	1	1	NA	0.500761	low
TCGA_G2_A2ES	Meta-testing cohort 1_444	2.75068	1	2	1	2	2	2.21411	high
BLCA_Nac_44	Meta-testing cohort 1_445	7.06849	0	2	1	2	2	3.10451	high
U0426	Meta-testing cohort 1_446	5.16164	0	2	2	0	1	0.191851	low
SAM3785587846ce	Meta-testing cohort 1_447	0.580574	1	1	2	1	NA	0.65597	low
U0316	Meta-testing cohort 1_448	4.79178	0	1	1	0	2	0.162304	low
GSM71061	Meta-testing cohort 1_449	4.93151	0	NA	NA	0	2	0.470115	low
TCGA_HQ_A5NE	Meta-testing cohort 1_45	1.0137	1	1	1	3	2	2.7066	high
TCGA_FD_A6TE	Meta-testing cohort 1_450	1.03014	0	1	1	4	2	0.288772	low
GSM4974848	Meta-testing cohort 1_451	4.10959	0	NA	NA	0	2	0.27257	low
GSM2301804	Meta-testing cohort 1_452	8.25699	1	1	1	0	2	1.19638	high
BL020	Meta-testing cohort 1_453	0.435616	1	NA	NA	NA	NA	3.7992	high
GSM3689011	Meta-testing cohort 1_454	1.14247	1	NA	1	2	2	1.34306	high
GSM2301799	Meta-testing cohort 1_455	3.87781	1	1	1	4	2	1.50934	high
GSM3689171	Meta-testing cohort 1_456	0.608219	0	NA	2	1	2	1.62444	high
GSM3689074	Meta-testing cohort 1_457	0.000273973	0	NA	1	1	2	0.55038	low
FR_186_U133_2.CEL	Meta-testing cohort 1_458	0.246575	0	2	2	3	2	1.06303	high
TCGA_ZF_A9R5	Meta-testing cohort 1_459	2.9863	0	1	1	3	2	0.0795737	low
SAMdab9ca8fb5de	Meta-testing cohort 1_46	0.0162021	0	1	1	1	NA	5.12884	high
GSM814306	Meta-testing cohort 1_460	2.42387	0	2	2	0	1	0.196449	low
SAMf28c01545593	Meta-testing cohort 1_461	0.526567	1	1	1	1	NA	1.06168	high
U0516	Meta-testing cohort 1_462	1.86575	0	1	2	0	1	0.245941	low
GSM1173926	Meta-testing cohort 1_463	3.20548	1	1	1	3	NA	2.05144	high
BLCA_Nac_48	Meta-testing cohort 1_464	10.0274	0	1	2	2	2	0.310159	low
JMT1_27	Meta-testing cohort 1_465	5.03014	1	NA	NA	1	2	0.689703	low
GSM340705	Meta-testing cohort 1_466	3.74795	0	2	1	3	2	2.32155	high
GSM2301872	Meta-testing cohort 1_467	0.655068	1	2	1	3	2	1.03686	high
U0430	Meta-testing cohort 1_468	4.8411	0	2	1	0	2	0.601955	low
U0179	Meta-testing cohort 1_469	3.02466	0	2	1	0	2	1.55593	high
GSM814357	Meta-testing cohort 1_47	1.6024	0	1	1	3	2	1.82396	high
TCGA_UY_A9PH	Meta-testing cohort 1_470	4.27671	0	2	1	2	2	0.893631	low
TCGA_XF_AAMG	Meta-testing cohort 1_471	9.21644	0	1	1	3	2	0.372977	low
U0046	Meta-testing cohort 1_472	2.81918	0	1	1	1	2	0.794513	low
U1301	Meta-testing cohort 1_473	1.94795	0	2	1	1	2	0.343574	low
BL048	Meta-testing cohort 1_474	0.254795	1	NA	NA	NA	NA	1.13167	high
TCGA_SY_A9G5	Meta-testing cohort 1_475	3.24932	0	2	1	3	2	0.972047	low
GSM3689126	Meta-testing cohort 1_476	3.87123	0	NA	1	0	1	0.973714	low
GSM4974794	Meta-testing cohort 1_477	4.93151	0	NA	NA	1	2	1.72983	high
GSM1173910	Meta-testing cohort 1_478	5.16164	1	2	1	3	NA	1.32919	high
GSM4974635	Meta-testing cohort 1_479	4.93151	0	NA	NA	1	2	3.07002	high
GSM1173946	Meta-testing cohort 1_48	5.07123	1	1	1	3	NA	3.49592	high
TCGA_XF_AAMQ	Meta-testing cohort 1_480	5.96438	0	1	2	2	2	0.999074	low
GSM3689161	Meta-testing cohort 1_481	5.4	1	NA	2	2	2	1.64749	high
U0130	Meta-testing cohort 1_482	2.46575	0	1	1	0	1	0.776658	low
GSM340682	Meta-testing cohort 1_483	4.94795	0	2	1	1	1	2.39857	high
GSM1173944	Meta-testing cohort 1_484	0.394521	0	2	1	3	NA	0.944479	low
GSM806924	Meta-testing cohort 1_485	1.49671	0	1	1	1	2	1.22135	high
U0118	Meta-testing cohort 1_486	3.3863	0	1	2	0	1	0.631793	low
GSM340698.y	Meta-testing cohort 1_487	2.34247	1	2	1	1	2	1.42221	high
TCGA_FD_A6TG	Meta-testing cohort 1_488	0.254795	1	2	1	4	2	1.02679	high
GSM4974754	Meta-testing cohort 1_489	4.93151	0	NA	NA	0	1	0.671604	low
TCGA_5N_A9KI	Meta-testing cohort 1_49	0.208219	1	2	2	3	2	1.54289	high
BLCA_Cx_240	Meta-testing cohort 1_490	6.65753	0	1	2	3	2	2.09504	high
U0904	Meta-testing cohort 1_491	2.76986	0	2	1	0	1	0.35017	low
BLCA_Nac_87	Meta-testing cohort 1_492	4.84932	0	1	1	2	2	0.34489	low
TCGA_ZF_A9R0	Meta-testing cohort 1_493	1.86301	1	2	1	3	2	2.03178	high
GSM1173917	Meta-testing cohort 1_494	2.07945	0	2	1	3	NA	0.969804	low
SAMdf3e42c8672a	Meta-testing cohort 1_495	0.602177	1	1	1	3	NA	0.572852	low
SAMbfdffb97c446	Meta-testing cohort 1_496	0.550871	1	1	2	4	NA	2.05401	high
TCGA_ZF_AA4N	Meta-testing cohort 1_497	0.241096	1	2	1	2	2	2.09136	high
p1419_269.CEL	Meta-testing cohort 1_498	9.20548	0	NA	NA	2	2	2.21425	high
GSM3689090	Meta-testing cohort 1_499	0.000273973	0	NA	1	1	2	0.251111	low
GSM2301842	Meta-testing cohort 1_5	0.619726	1	2	1	2	2	2.39956	high
TCGA_CF_A3MH	Meta-testing cohort 1_50	1.09041	0	2	1	2	1	1.54668	high
GSM786517	Meta-testing cohort 1_500	4.6797	0	1	1	1	2	0.774464	low
BLCA_Cx_247	Meta-testing cohort 1_501	1.72603	1	1	2	3	2	2.10826	high
GSM340751.y	Meta-testing cohort 1_502	5.67123	0	1	1	1	1	1.6446	high
TCGA_BT_A42F	Meta-testing cohort 1_503	2.36712	0	1	1	4	2	1.00773	low
TCGA_FD_A3B3	Meta-testing cohort 1_504	2.66849	1	2	2	3	2	1.21086	high
U0458	Meta-testing cohort 1_505	5.5726	0	1	1	0	1	0.208739	low
GSM2301884	Meta-testing cohort 1_506	4.86986	0	1	2	3	2	0.634645	low
TCGA_CF_A8HX	Meta-testing cohort 1_507	0.945205	0	1	2	2	2	0.930462	low
GSM340611.y	Meta-testing cohort 1_508	1.52055	1	2	1	1	1	2.69814	high
SAMb963dda93cfd	Meta-testing cohort 1_509	0.226829	1	1	1	4	NA	2.91481	high
GSM806898	Meta-testing cohort 1_51	2.46411	0	2	1	2	2	0.896019	low
GSM3689160	Meta-testing cohort 1_510	0.000273973	0	NA	2	1	2	0.195739	low
TCGA_E7_A5KE	Meta-testing cohort 1_511	0.0465753	0	2	2	2	2	0.491886	low
GSM1173929	Meta-testing cohort 1_512	2.05479	0	1	1	3	NA	2.72151	high
TCGA_GC_A3BM	Meta-testing cohort 1_513	1.78356	1	2	1	2	2	1.11582	high
TCGA_YF_AA3L	Meta-testing cohort 1_514	0.99726	0	1	2	2	2	0.274684	low
SAMd135d5867fe3	Meta-testing cohort 1_515	0.297038	1	1	1	4	NA	1.60125	high
p1404_73.CEL	Meta-testing cohort 1_516	1.06849	1	NA	NA	2	2	1.73016	high
SAM3b15b4c6311d	Meta-testing cohort 1_517	1.76333	0	1	1	3	NA	1.31408	high
TCGA_GU_A766	Meta-testing cohort 1_518	1.31507	0	1	1	2	2	2.4979	high
TCGA_CF_A1HS	Meta-testing cohort 1_519	1.04658	0	2	2	3	2	2.20719	high
SAM698d8d76b934	Meta-testing cohort 1_52	0.0351045	1	1	2	4	NA	1.04939	high
GSM340617	Meta-testing cohort 1_520	10.7342	0	2	1	1	1	0.74375	low
BL073	Meta-testing cohort 1_521	1.71781	1	NA	NA	NA	NA	2.09922	high
GSM806912	Meta-testing cohort 1_522	1.12685	0	2	2	0	1	0.991363	low
JMT1_14	Meta-testing cohort 1_523	0.756164	0	NA	NA	1	2	1.05219	high
GSM3688993	Meta-testing cohort 1_524	0.139726	0	NA	1	1	2	0.406761	low
GSM4974715	Meta-testing cohort 1_525	3.45205	0	NA	NA	1	2	0.466272	low
GSM1816511	Meta-testing cohort 1_526	8.39178	0	NA	NA	NA	NA	1.11582	high
GSM340666	Meta-testing cohort 1_527	6.19151	0	1	1	1	1	1.87419	high
BLCA_Nac_288	Meta-testing cohort 1_528	0.575342	1	2	1	3	2	1.31926	high
U0558	Meta-testing cohort 1_529	3.44384	0	1	1	0	1	0.774464	low
GSM71064	Meta-testing cohort 1_53	4.43836	0	NA	NA	0	2	0.375635	low
GSM1167454	Meta-testing cohort 1_530	3.55068	1	2	NA	2	NA	0.68258	low
GSM814193	Meta-testing cohort 1_531	4.76938	0	2	1	0	1	2.69028	high
GSM1173977	Meta-testing cohort 1_532	3.24658	1	2	1	0	NA	0.34489	low
GSM814131	Meta-testing cohort 1_533	6.90681	0	1	1	1	2	1.19065	high
GSM806916	Meta-testing cohort 1_534	1.24301	0	2	1	2	2	0.753282	low
GSM1173901	Meta-testing cohort 1_535	1.93151	0	2	1	3	NA	2.28734	high
U0977	Meta-testing cohort 1_536	4.35616	0	1	1	1	1	0.109891	low
GSM786565	Meta-testing cohort 1_537	3.52395	0	1	1	1	1	0.320738	low
GSM814343	Meta-testing cohort 1_538	0.964684	0	1	1	1	1	2.10826	high
GSM340746	Meta-testing cohort 1_539	1.83014	0	2	1	2	2	2.85833	high
GSM2301862	Meta-testing cohort 1_54	19.8173	1	1	1	3	2	0.471372	low
GSM814231	Meta-testing cohort 1_540	3.88035	0	2	1	0	1	2.85833	high
GSM1173920	Meta-testing cohort 1_541	4.23288	1	2	1	3	NA	0.596756	low
GSM3699762	Meta-testing cohort 1_542	7.47945	1	2	2	0	1	0.313937	low
TCGA_G2_A3IB	Meta-testing cohort 1_543	0.60274	1	2	1	2	2	1.54668	high
BLCA_Cx_268	Meta-testing cohort 1_544	9.20548	0	2	1	3	2	1.75021	high
FR_259_U133_2.CEL	Meta-testing cohort 1_545	10.8493	1	2	1	2	2	0.518343	low
U0965	Meta-testing cohort 1_546	4.55342	0	2	1	0	1	0.820516	low
U1207	Meta-testing cohort 1_547	2.63014	0	2	1	1	1	1.13843	high
GSM3689041	Meta-testing cohort 1_548	0.000273973	0	NA	1	0	1	1.73016	high
GSM806933	Meta-testing cohort 1_549	2.79945	0	2	1	2	2	3.26058	high
GSM119728	Meta-testing cohort 1_55	2.71233	0	NA	NA	3	NA	2.69814	high
GSM4974824	Meta-testing cohort 1_550	1.64384	0	NA	NA	0	1	0.506975	low
U1106	Meta-testing cohort 1_551	2.6137	0	2	1	0	1	0.66495	low
U1233	Meta-testing cohort 1_552	3.03288	0	1	1	1	2	3.48298	high
U1256	Meta-testing cohort 1_553	1.17534	0	2	1	0	1	0.246061	low
GSM340692	Meta-testing cohort 1_554	2.98356	1	1	1	1	1	0.223572	low
GSM3699746	Meta-testing cohort 1_555	16.4384	1	1	2	0	1	0.957019	low
GSM814156	Meta-testing cohort 1_556	6.46365	0	2	2	0	1	0.613184	low
SAM5fc9ae0aed1f	Meta-testing cohort 1_557	0.0513066	1	1	1	4	NA	1.02238	low
p1404_63.CEL	Meta-testing cohort 1_558	0.524226	1	NA	NA	2	2	2.09504	high
GSM786557	Meta-testing cohort 1_559	8.5358	1	2	1	3	2	1.7222	high
GSM340703	Meta-testing cohort 1_56	3.90411	0	1	1	0	1	0.421541	low
GSM2454218	Meta-testing cohort 1_560	12.411	1	1	2	0	1	1.05219	high
GSM2301776	Meta-testing cohort 1_561	11.9219	0	1	1	2	2	1.53806	high
U1337	Meta-testing cohort 1_562	2.03014	0	2	1	0	1	1.89912	high
GSM3699759	Meta-testing cohort 1_563	6.41096	0	2	1	0	1	1.53429	high
BLCA_Nac_201	Meta-testing cohort 1_564	0.0821918	1	2	2	3	2	1.04137	high
GSM1167465	Meta-testing cohort 1_565	0.715068	0	2	NA	2	NA	1.4697	high
GSM340689.y	Meta-testing cohort 1_566	5.72055	0	2	2	1	1	0.572852	low
FR_44_U133_2.CEL	Meta-testing cohort 1_567	0.739726	1	1	2	3	2	1.50633	high
GSM3689048	Meta-testing cohort 1_568	2.76164	1	NA	2	3	2	2.70038	high
U0642	Meta-testing cohort 1_569	1.8	0	2	1	0	1	0.586624	low
U0772	Meta-testing cohort 1_57	3.48493	0	1	1	0	1	0.259372	low
GSM4974837	Meta-testing cohort 1_570	4.0274	0	NA	NA	1	2	1.83918	high
UCC_EU2015_58	Meta-testing cohort 1_571	3.42	1	2	1	1	NA	0.651051	low
U0036	Meta-testing cohort 1_572	2.71233	0	1	1	0	2	0.544401	low
U0392	Meta-testing cohort 1_573	4.66849	0	2	1	0	1	0.507866	low
JMT1_86	Meta-testing cohort 1_574	8.87671	0	NA	NA	1	2	0.915743	low
UCC_EU2015_28	Meta-testing cohort 1_575	4.0611	1	2	1	2	NA	1.45952	high
U0091	Meta-testing cohort 1_576	1.15068	1	2	1	0	2	0.969804	low
U0200	Meta-testing cohort 1_577	4.84932	0	1	1	0	2	0.487661	low
GSM786514	Meta-testing cohort 1_578	0.602177	1	1	1	3	2	0.818599	low
U1212	Meta-testing cohort 1_579	1.56164	0	1	2	0	2	0.490499	low
U0383	Meta-testing cohort 1_58	1.85753	0	2	1	0	2	2.29117	high
p1404_178.CEL	Meta-testing cohort 1_580	1.23288	1	NA	NA	2	1	1.48826	high
GSM340676	Meta-testing cohort 1_581	5.51233	0	2	1	0	1	1.33274	high
GSM2301787	Meta-testing cohort 1_582	9.5663	1	1	1	3	2	0.34489	low
BL019	Meta-testing cohort 1_583	0.221918	0	NA	NA	NA	NA	0.928711	low
GSM3689054	Meta-testing cohort 1_584	0.000273973	0	NA	1	1	2	0.661246	low
GSM1167422	Meta-testing cohort 1_585	4.70959	1	2	NA	2	NA	2.24173	high
GSM814142	Meta-testing cohort 1_586	0.618803	1	1	1	2	2	0.728947	low
GSM814249	Meta-testing cohort 1_587	3.40747	0	1	1	1	1	0.962455	low
U0573	Meta-testing cohort 1_588	3.29589	0	1	1	1	1	1.54256	high
GSM4974840	Meta-testing cohort 1_589	0.410959	1	NA	NA	1	2	0.458403	low
TCGA_XF_A9SM	Meta-testing cohort 1_59	2.87123	0	2	1	3	2	0.507866	low
GSM2301797	Meta-testing cohort 1_590	0.816164	1	2	1	0	1	3.49592	high
U0141	Meta-testing cohort 1_591	3.40274	0	1	1	0	1	1.14753	high
TCGA_XF_AAN0	Meta-testing cohort 1_592	4.70685	1	2	1	4	2	1.70435	high
GSM1709094	Meta-testing cohort 1_593	3.56712	1	2	NA	2	NA	0.818599	low
SAMb8101c538753	Meta-testing cohort 1_594	1.10174	1	1	1	4	NA	1.99143	high
GSM2301863	Meta-testing cohort 1_595	4.10959	1	2	1	3	2	1.13232	high
GSM814230	Meta-testing cohort 1_596	4.1803	0	1	1	0	2	0.631793	low
U1272	Meta-testing cohort 1_597	2.58904	0	1	1	0	2	0.0609421	low
GSM814254	Meta-testing cohort 1_598	2.7049	0	2	1	2	2	1.95172	high
JMT1_33	Meta-testing cohort 1_599	2.30137	1	NA	NA	1	2	1.06887	high
GSM2454227	Meta-testing cohort 1_6	10.9315	1	1	1	0	2	1.62011	high
BLCA_Nac_53	Meta-testing cohort 1_60	5.09589	0	1	2	2	2	2.09504	high
GSM3689068	Meta-testing cohort 1_600	12.1479	1	NA	2	0	1	0.461476	low
UCC_EU2015_15	Meta-testing cohort 1_601	6.5211	0	2	1	0	NA	0.835186	low
GSM814136	Meta-testing cohort 1_602	1.02143	0	2	1	0	1	0.464353	low
SAMff41c4e8c08f	Meta-testing cohort 1_603	0.202526	1	1	1	1	NA	0.476792	low
GSM814075	Meta-testing cohort 1_604	1.62402	0	2	1	1	1	0.572852	low
GSM4974667	Meta-testing cohort 1_605	1.31507	0	NA	NA	1	2	0.574383	low
GSM340641	Meta-testing cohort 1_606	8.07397	0	1	1	1	2	0.833972	low
TCGA_GD_A6C6	Meta-testing cohort 1_607	0.183562	0	1	1	3	2	0.174626	low
TCGA_DK_AA6X	Meta-testing cohort 1_608	1.27945	0	1	1	2	2	1.41534	high
BLCA_Nac_31	Meta-testing cohort 1_609	2.79452	1	1	2	2	2	0.886766	low
GSM786501	Meta-testing cohort 1_61	13.7799	0	2	1	1	1	1.26591	high
TCGA_XF_A9SL	Meta-testing cohort 1_610	5.53425	1	2	1	4	2	2.16087	high
GSM814192	Meta-testing cohort 1_611	5.2936	0	1	1	0	2	0.629031	low
BLCA_Cx_262	Meta-testing cohort 1_612	1.80822	1	2	1	3	2	2.71449	high
GSM814318	Meta-testing cohort 1_613	1.94828	0	2	1	0	1	1.35069	high
GSM806867	Meta-testing cohort 1_614	6.90658	0	1	1	1	2	1.19065	high
BLCA_Nac_45	Meta-testing cohort 1_615	0.410959	1	2	1	3	2	3.07963	high
GSM2301871	Meta-testing cohort 1_616	1.30932	0	1	1	4	2	3.48298	high
UCC31_primary	Meta-testing cohort 1_617	4.96685	1	2	1	0	NA	0.173475	low
GSM814351	Meta-testing cohort 1_618	0.459373	0	1	1	0	1	0.928711	low
TCGA_UY_A78K	Meta-testing cohort 1_619	1.46849	1	1	1	4	2	0.896019	low
U0290	Meta-testing cohort 1_62	5.81096	0	2	1	0	2	3.23976	high
GSM71066	Meta-testing cohort 1_620	4.93151	0	NA	NA	0	1	0.685401	low
GSM814135	Meta-testing cohort 1_621	5.96375	0	1	1	0	1	1.20874	high
BL038	Meta-testing cohort 1_622	2.12055	0	NA	NA	NA	NA	0.572852	low
BLCA_Nac_127	Meta-testing cohort 1_623	0.493151	1	2	1	3	2	1.35967	high
GSM1709076	Meta-testing cohort 1_624	4.8337	1	2	NA	0	NA	2.95098	high
GSM4974766	Meta-testing cohort 1_625	3.20548	0	NA	NA	1	2	0.888435	low
U0431	Meta-testing cohort 1_626	0.772603	1	2	1	1	2	0.305988	low
U0476	Meta-testing cohort 1_627	4.61096	0	2	1	1	2	0.481448	low
U0638	Meta-testing cohort 1_628	3.14795	0	2	1	0	1	0.457278	low
U0954	Meta-testing cohort 1_629	4.6274	0	2	1	0	1	0.569121	low
TCGA_SY_A9G0	Meta-testing cohort 1_63	2.76164	1	2	1	4	2	3.97314	high
GSM3689072	Meta-testing cohort 1_630	2.75342	0	NA	1	0	1	2.86895	high
SAM81b71522417a	Meta-testing cohort 1_631	0.175522	1	1	2	1	NA	2.10826	high
BLCA_Nac_125	Meta-testing cohort 1_632	0.657534	1	2	1	4	2	2.10826	high
GSM71063	Meta-testing cohort 1_633	1.87397	1	NA	NA	0	2	1.09081	high
SAMe0c49ea0df5d	Meta-testing cohort 1_634	0.340244	1	1	2	3	NA	4.8622	high
U0184	Meta-testing cohort 1_635	3.09863	0	2	1	0	1	0.25533	low
U0832	Meta-testing cohort 1_636	0.879452	0	1	1	0	1	1.54668	high
U0045	Meta-testing cohort 1_637	1.52877	0	2	1	0	1	0.466272	low
GSM3689125	Meta-testing cohort 1_638	3.72329	0	NA	1	1	2	2.10826	high
U0623	Meta-testing cohort 1_639	2.14521	1	2	1	0	1	1.98665	high
JMT1_20	Meta-testing cohort 1_64	1.26575	0	NA	NA	1	2	0.389786	low
GSM3699789	Meta-testing cohort 1_640	0.986301	0	2	1	0	2	0.925166	low
JMT1_15	Meta-testing cohort 1_641	4.99726	0	NA	NA	1	2	0.568169	low
SAMe9ae8beb82fa	Meta-testing cohort 1_642	0.450958	1	1	1	3	NA	5.14789	high
GSM3689037	Meta-testing cohort 1_643	1.3726	1	NA	1	2	2	0.445212	low
GSM2301906	Meta-testing cohort 1_644	8.26192	0	2	1	0	1	3.80936	high
U0515	Meta-testing cohort 1_645	0.0739726	1	1	1	1	2	0.370454	low
GSM3689026	Meta-testing cohort 1_646	0.000273973	0	NA	1	0	2	0.962455	low
U1304	Meta-testing cohort 1_647	2.14521	0	2	1	1	1	0.121477	low
SAM032c642382a7	Meta-testing cohort 1_648	0.205226	1	1	2	4	NA	0.789951	low
GSM340711	Meta-testing cohort 1_649	3.43562	0	1	2	1	1	3.00859	high
SAM2dc578e0165f	Meta-testing cohort 1_65	0.162021	1	1	1	4	NA	1.54668	high
GSM814102	Meta-testing cohort 1_650	5.93402	0	2	2	0	1	0.841195	low
GSM806828	Meta-testing cohort 1_651	2.87514	0	1	1	0	1	3.77665	high
GSM1173976	Meta-testing cohort 1_652	3.30411	0	2	1	3	NA	4.02244	high
U0766	Meta-testing cohort 1_653	1.9726	0	2	2	0	2	0.261749	low
GSM4974809	Meta-testing cohort 1_654	1.31507	0	NA	NA	0	1	0.685401	low
GSM1709088	Meta-testing cohort 1_655	3.12164	1	1	NA	0	NA	3.49592	high
BLCA_Nac_94	Meta-testing cohort 1_656	5.83562	0	2	1	2	2	0.631793	low
TCGA_FD_A3B4	Meta-testing cohort 1_657	1.39726	1	1	2	3	2	2.35377	high
GSM340619.y	Meta-testing cohort 1_658	10.874	0	2	1	1	1	0.928711	low
p1404_163.CEL	Meta-testing cohort 1_659	4.76938	0	NA	NA	2	2	1.74475	high
p1404_123_re.CEL	Meta-testing cohort 1_66	6.9863	0	NA	NA	2	2	1.48565	high
JMT1_16	Meta-testing cohort 1_660	1.22466	0	NA	NA	1	2	0.656663	low
GSM1709070	Meta-testing cohort 1_661	4.2937	1	1	NA	0	NA	1.02679	high
BLCA_Nac_121	Meta-testing cohort 1_662	0.328767	1	1	1	3	NA	1.04939	high
U0329	Meta-testing cohort 1_663	5.17808	0	2	1	0	1	0.928711	low
UCC_EU2015_49	Meta-testing cohort 1_664	0.598356	0	1	1	1	NA	0.0853838	low
U1002	Meta-testing cohort 1_665	2.87671	0	2	2	0	1	0.352926	low
U0912	Meta-testing cohort 1_666	3.47671	0	2	1	0	1	0.769863	low
p1404_172.CEL	Meta-testing cohort 1_667	0.618803	1	NA	NA	2	2	0.533352	low
GSM1167388	Meta-testing cohort 1_668	0.665753	0	2	NA	3	NA	2.86895	high
SAM59f392864f5d	Meta-testing cohort 1_669	1.46089	1	1	1	2	NA	0.751274	low
GSM814172	Meta-testing cohort 1_67	1.69428	1	1	2	2	1	2.58692	high
GSM806856	Meta-testing cohort 1_670	5.86356	0	2	1	1	2	1.73558	high
TCGA_ZF_A9RF	Meta-testing cohort 1_671	5.33973	0	2	1	2	2	1.08575	high
BLCA_Nac_113	Meta-testing cohort 1_672	4.52055	0	2	2	2	2	1.54668	high
U0059	Meta-testing cohort 1_673	2.95068	0	1	1	0	2	1.54668	high
GSM1167436	Meta-testing cohort 1_674	3.92055	1	2	NA	2	NA	1.09372	high
U1343	Meta-testing cohort 1_675	2.20274	0	2	1	1	2	0.476792	low
SAMce39dd79b441	Meta-testing cohort 1_676	0.515766	1	1	1	4	NA	1.04939	high
TCGA_XF_A9SJ	Meta-testing cohort 1_677	0.268493	1	2	1	4	2	0.893631	low
GSM4974743	Meta-testing cohort 1_678	4.76712	0	NA	NA	0	1	0.764263	low
UCC_EU2015_3	Meta-testing cohort 1_679	12.2375	0	1	2	1	NA	0.162019	low
U0011	Meta-testing cohort 1_68	3.04932	0	2	1	0	2	0.631793	low
SAM166a419a4e5a	Meta-testing cohort 1_680	0.442857	1	1	1	4	NA	1.84025	high
p1419_294.CEL	Meta-testing cohort 1_681	1.34569	0	NA	NA	2	2	0.883483	low
UCC_EU2015_1	Meta-testing cohort 1_682	17.0047	0	1	1	0	NA	0.134806	low
GSM2301889	Meta-testing cohort 1_683	0.318082	1	2	2	2	2	1.4483	high
TCGA_DK_A3IN	Meta-testing cohort 1_684	0.684932	1	2	1	3	2	2.20719	high
SAMe94c30c30616	Meta-testing cohort 1_685	1.26376	1	1	1	1	NA	4.8622	high
U0608	Meta-testing cohort 1_686	3.36986	0	2	1	1	2	0.930344	low
U0459	Meta-testing cohort 1_687	4.88219	0	1	1	1	1	1.54256	high
GSM3689129	Meta-testing cohort 1_688	0.945205	1	NA	1	4	2	0.542507	low
GSM1173969	Meta-testing cohort 1_689	2.90959	0	1	1	4	NA	1.42938	high
GSM3689108	Meta-testing cohort 1_69	0.567123	0	NA	1	1	2	0.34489	low
TCGA_BT_A20R	Meta-testing cohort 1_690	0.421918	1	2	2	4	2	0.861189	low
GSM340667.x	Meta-testing cohort 1_691	6.22192	0	1	2	1	1	0.56183	low
GSM340733	Meta-testing cohort 1_692	1.40822	1	1	1	2	1	1.24115	high
SAMe50d15fde368	Meta-testing cohort 1_693	1.5527	0	1	2	1	NA	1.2693	high
U1100	Meta-testing cohort 1_694	2.84384	0	2	1	0	2	0.172531	low
GSM814059	Meta-testing cohort 1_695	4.52348	0	2	1	1	1	1.93504	high
GSM1167428	Meta-testing cohort 1_696	5.39178	0	2	NA	2	NA	1.97944	high
U0032	Meta-testing cohort 1_697	2.98356	0	1	1	0	1	0.422773	low
GSM1709092	Meta-testing cohort 1_698	1.48274	0	2	NA	4	NA	0.854607	low
p1419_216.CEL	Meta-testing cohort 1_699	0.899831	1	NA	NA	2	2	2.11732	high
TCGA_S5_A6DX	Meta-testing cohort 1_7	0.153425	1	2	1	4	2	0.247192	low
GSM340678	Meta-testing cohort 1_70	0.983562	1	2	1	3	2	1.97944	high
GSM4974841	Meta-testing cohort 1_700	2.63014	0	NA	NA	0	1	0.461476	low
U0120	Meta-testing cohort 1_701	2.21096	0	2	2	0	2	1.1056	high
GSM4974753	Meta-testing cohort 1_702	2.63014	0	NA	NA	0	1	1.42557	high
U0346	Meta-testing cohort 1_703	5.11233	0	2	2	0	2	2.09136	high
SAM30cf07d4874f	Meta-testing cohort 1_704	0.958623	1	1	1	2	NA	1.41186	high
GSM3689038	Meta-testing cohort 1_705	0.000273973	0	NA	1	1	2	0.34489	low
GSM4974783	Meta-testing cohort 1_706	4.93151	0	NA	NA	1	2	1.84242	high
U0611	Meta-testing cohort 1_707	3.13973	0	1	1	0	1	0.665391	low
FR_267_U133_2.CEL	Meta-testing cohort 1_708	7.47945	1	2	2	2	1	0.798865	low
GSM806889	Meta-testing cohort 1_709	4.57726	0	2	1	1	2	0.41511	low
GSM786528	Meta-testing cohort 1_71	0.23223	1	2	2	3	2	1.73016	high
GSM786525	Meta-testing cohort 1_710	0.437456	1	2	2	3	2	2.10826	high
U0779	Meta-testing cohort 1_711	3.27945	0	2	1	0	1	0.529878	low
BLCA_Nac_269	Meta-testing cohort 1_712	0.986301	1	2	1	3	2	1.10519	high
U0847	Meta-testing cohort 1_713	2.64658	0	1	1	0	1	0.877173	low
GSM2301838	Meta-testing cohort 1_714	2.66548	1	2	2	4	1	2.21425	high
GSM2301859	Meta-testing cohort 1_715	3.85068	0	1	1	0	1	1.73365	high
U0001	Meta-testing cohort 1_716	2.65479	0	2	1	0	1	0.631793	low
GSM4974808	Meta-testing cohort 1_717	4.93151	0	NA	NA	0	1	2.11732	high
GSM340736.x	Meta-testing cohort 1_718	2.47397	0	2	1	1	2	1.63173	high
BLCA_Nac_58	Meta-testing cohort 1_719	10.1918	0	1	1	2	2	1.99143	high
GSM340629	Meta-testing cohort 1_72	4.14521	1	2	1	1	1	2.21425	high
SAM491e341d5a82	Meta-testing cohort 1_720	0.15392	1	1	2	2	NA	1.49084	high
TCGA_DK_AA6S	Meta-testing cohort 1_721	13.8356	0	1	1	3	2	0.711476	low
TCGA_G2_AA3C	Meta-testing cohort 1_722	0.578082	1	2	1	4	2	2.36253	high
GSM1167433	Meta-testing cohort 1_723	5.95068	1	2	NA	3	NA	0.911702	low
GSM2454239	Meta-testing cohort 1_724	8.71233	0	2	1	0	1	0.0856334	low
GSM4974791	Meta-testing cohort 1_725	3.78082	1	NA	NA	1	2	3.77193	high
GSM2301865	Meta-testing cohort 1_726	5.84795	0	1	1	3	2	1.58528	high
BLCA_Nac_32	Meta-testing cohort 1_727	7.64384	0	1	1	3	2	1.343	high
GSM2301820	Meta-testing cohort 1_728	4.54603	0	2	2	0	1	1.09081	high
GSM3689181	Meta-testing cohort 1_729	1.20822	0	NA	1	0	2	0.647558	low
FR_138_U133_2.CEL	Meta-testing cohort 1_73	0.246575	1	2	1	3	2	0.975131	low
GSM814165	Meta-testing cohort 1_730	5.58274	0	2	1	1	2	0.0756141	low
TCGA_DK_A6B6	Meta-testing cohort 1_731	3.05479	0	1	1	2	2	0.323562	low
FR_79_U133_2.CEL	Meta-testing cohort 1_732	0.0821918	0	1	1	2	2	2.69375	high
TCGA_FD_A5C0	Meta-testing cohort 1_733	1.50685	1	1	1	4	2	1.10729	high
GSM2454211	Meta-testing cohort 1_734	8.63014	1	2	1	0	1	0.631793	low
GSM2301839	Meta-testing cohort 1_735	1.29616	1	1	2	1	2	0.470115	low
GSM4974767	Meta-testing cohort 1_736	4.93151	0	NA	NA	0	1	0.685401	low
GSM814052	Meta-testing cohort 1_737	9.06587	0	1	1	2	2	0.630712	low
GSM1709096	Meta-testing cohort 1_738	2.53808	0	2	NA	3	NA	1.90132	high
GSM814228	Meta-testing cohort 1_739	4.46673	0	1	2	0	1	1.62444	high
GSM806890	Meta-testing cohort 1_74	5.7263	0	2	1	0	1	1.54919	high
GSM806910	Meta-testing cohort 1_740	4.42356	0	1	1	1	2	0.651645	low
SAM00b9e5c52da9	Meta-testing cohort 1_741	0.15662	1	1	1	3	NA	2.22315	high
TCGA_E7_A6MF	Meta-testing cohort 1_742	2.05479	0	1	1	2	1	0.764263	low
TCGA_G2_A3IE	Meta-testing cohort 1_743	1.67671	1	1	1	2	2	0.502565	low
U0109	Meta-testing cohort 1_744	1.95616	0	2	1	1	1	1.3633	high
GSM3689159	Meta-testing cohort 1_745	0.756164	1	NA	1	2	2	1.41711	high
U0053	Meta-testing cohort 1_746	2.49041	0	2	1	0	1	0.741459	low
SAMa535fcdf18a0	Meta-testing cohort 1_747	1.42038	0	1	1	1	NA	2.69814	high
U0332	Meta-testing cohort 1_748	4.83288	0	1	2	0	2	0.694116	low
GSM340638.y	Meta-testing cohort 1_749	5.50685	1	2	1	1	1	0.614939	low
GSM814077	Meta-testing cohort 1_75	8.08497	0	2	1	1	2	2.79979	high
GSM814186	Meta-testing cohort 1_750	4.0641	0	2	1	1	1	1.10371	high
p1419_241.CEL	Meta-testing cohort 1_751	1.06849	1	NA	NA	2	2	0.808565	low
BLCA_Nac_116	Meta-testing cohort 1_752	2.63014	1	2	1	3	1	2.12297	high
BLCA_Nac_50	Meta-testing cohort 1_753	5.91781	0	1	1	3	2	1.10434	high
GSM1709069	Meta-testing cohort 1_754	3.8211	1	1	NA	0	NA	1.64749	high
GSM2301846	Meta-testing cohort 1_755	1.05123	1	2	2	3	2	0.362834	low
GSM1173983	Meta-testing cohort 1_756	2.27671	1	1	1	3	NA	3.30104	high
GSM806847	Meta-testing cohort 1_757	6.5258	0	2	2	0	1	0.500761	low
GSM814153	Meta-testing cohort 1_758	3.72633	0	2	1	0	1	1.18856	high
U0115	Meta-testing cohort 1_759	3.51781	0	2	2	0	2	0.620737	low
GSM1816546	Meta-testing cohort 1_76	1.20822	0	NA	NA	NA	NA	3.49592	high
UCC6_primary	Meta-testing cohort 1_760	10.5855	0	2	2	0	NA	0.454466	low
TCGA_GC_A6I3	Meta-testing cohort 1_761	1.1589	0	2	2	4	2	1.11582	high
U1037	Meta-testing cohort 1_762	1.04384	0	2	1	1	2	0.836454	low
TCGA_4Z_AA7S	Meta-testing cohort 1_763	2.91507	1	2	1	3	2	1.07921	high
BLCA_Nac_24	Meta-testing cohort 1_764	3.45205	1	2	1	3	2	1.54668	high
TCGA_BL_A0C8	Meta-testing cohort 1_765	3.33973	0	2	1	1	2	0.854607	low
GSM340721	Meta-testing cohort 1_766	0.323288	1	2	1	2	2	3.2782	high
GSM2301812	Meta-testing cohort 1_767	2.01288	0	1	1	1	2	2.10212	high
GSM340737	Meta-testing cohort 1_768	2.44356	0	1	1	1	1	0.888248	low
FR_262_U133_2.CEL	Meta-testing cohort 1_769	0.493151	1	1	2	3	2	1.31408	high
GSM3689015	Meta-testing cohort 1_77	0.123288	0	NA	1	1	2	0.655594	low
U0121	Meta-testing cohort 1_770	2.45753	0	2	2	0	1	0.441389	low
SAM8e43e9caf307	Meta-testing cohort 1_771	0.0405052	1	1	2	2	NA	1.81664	high
GSM119497	Meta-testing cohort 1_772	34.5205	0	NA	NA	3	NA	1.10124	high
SAMd98bac0a070f	Meta-testing cohort 1_773	0.170122	1	1	1	3	NA	3.07963	high
TCGA_BT_A2LA	Meta-testing cohort 1_774	1.43014	0	1	1	3	2	1.11582	high
GSM2301818	Meta-testing cohort 1_775	9.96575	0	2	1	0	2	0.843551	low
GSM3699765	Meta-testing cohort 1_776	6.73973	0	2	1	0	1	0.764263	low
TCGA_K4_A5RH	Meta-testing cohort 1_777	0.756164	0	2	1	3	2	1.14672	high
GSM814246	Meta-testing cohort 1_778	4.41539	0	1	1	2	2	0.471372	low
GSM1816536	Meta-testing cohort 1_779	1.69315	0	NA	NA	NA	NA	1.26591	high
FR_12_U133_2.CEL	Meta-testing cohort 1_78	2.13699	1	2	1	3	2	0.606862	low
GSM1173954	Meta-testing cohort 1_780	3.82192	1	1	1	2	NA	0.629031	low
GSM3689021	Meta-testing cohort 1_781	2.23562	0	NA	1	0	1	0.542507	low
U0139	Meta-testing cohort 1_782	0.0739726	0	1	1	1	2	2.004	high
U1249	Meta-testing cohort 1_783	1.10959	0	2	2	1	1	0.196449	low
U0559	Meta-testing cohort 1_79	2.08767	0	1	1	1	2	0.340663	low
GSM4974813	Meta-testing cohort 1_8	4.93151	0	NA	NA	1	2	0.329389	low
UCC_EU2015_21	Meta-testing cohort 1_80	6.10685	1	2	1	3	NA	0.196449	low
TCGA_CF_A9FF	Meta-testing cohort 1_81	0.989041	0	1	1	2	2	0.564181	low
BLCA_Cx_123	Meta-testing cohort 1_82	6.9863	0	2	1	2	2	0.741459	low
BL124	Meta-testing cohort 1_83	0.69863	1	NA	NA	NA	NA	1.3633	high
GSM3689112	Meta-testing cohort 1_84	2.11233	0	NA	1	0	1	0.810178	low
GSM4974763	Meta-testing cohort 1_85	4.93151	0	NA	NA	1	2	0.835186	low
SAM04c589eb3fb3	Meta-testing cohort 1_86	0.0567073	0	1	1	3	NA	0.818599	low
GSM340695	Meta-testing cohort 1_87	4.35342	0	1	1	1	1	2.42834	high
FR_39_U133_2_2.CEL	Meta-testing cohort 1_88	1.89041	1	1	1	2	2	0.692897	low
GSM340717	Meta-testing cohort 1_89	3.06575	0	1	1	1	1	0.478243	low
GSM4974651	Meta-testing cohort 1_9	4.93151	0	NA	NA	1	2	1.53806	high
U1240	Meta-testing cohort 1_90	2.8274	0	2	1	1	1	1.27688	high
GSM340765	Meta-testing cohort 1_91	0.969863	0	1	1	3	2	1.97944	high
GSM3689000	Meta-testing cohort 1_92	1.5863	1	NA	2	2	2	1.81664	high
U0439	Meta-testing cohort 1_93	4.77534	0	2	2	0	1	0.407508	low
GSM340669	Meta-testing cohort 1_94	6.17534	0	1	1	1	1	0.975131	low
GSM340666.y	Meta-testing cohort 1_95	7.20822	1	1	1	1	1	0.68902	low
BLCA_Nac_55	Meta-testing cohort 1_96	2.46575	1	2	2	3	2	1.26591	high
TCGA_G2_AA3B	Meta-testing cohort 1_97	5.50137	0	2	2	2	2	0.0735732	low
GSM340663	Meta-testing cohort 1_98	6.47096	0	2	1	1	2	1.46627	high
TCGA_DK_A2I1	Meta-testing cohort 1_99	1.49589	0	2	2	2	2	1.21086	high
GSM340742.x	Meta-testing cohort 2_1	1.96438	0	1	2	1	1	1.63414	high
GSM806908	Meta-testing cohort 2_10	4.76959	0	2	1	0	1	1.62444	high
SAM36851bc8b9ae	Meta-testing cohort 2_100	0.291637	1	1	1	1	NA	1.43243	high
TCGA_E7_A3X6	Meta-testing cohort 2_101	2.47671	1	2	1	2	1	0.420261	low
TCGA_GU_AATP	Meta-testing cohort 2_102	2.74795	0	2	1	4	2	2.55288	high
BLCA_Nac_59	Meta-testing cohort 2_103	4.52055	0	2	1	3	2	1.60342	high
TCGA_R3_A69X	Meta-testing cohort 2_104	1.1863	0	2	1	3	2	1.81134	high
TCGA_FD_A5BX	Meta-testing cohort 2_105	0.473973	1	2	1	4	2	2.09504	high
TCGA_KQ_A41Q	Meta-testing cohort 2_106	3.91507	0	2	1	3	2	0.391257	low
U0190	Meta-testing cohort 2_107	2.93425	0	2	1	0	1	1.30232	high
GSM806838	Meta-testing cohort 2_108	7.44725	0	2	2	0	1	1.62011	high
U0768	Meta-testing cohort 2_109	3.94521	0	1	1	0	1	0.427924	low
U0446	Meta-testing cohort 2_11	5.2274	0	2	1	0	1	1.08056	high
GSM4974779	Meta-testing cohort 2_110	4.93151	0	NA	NA	1	2	1.52503	high
GSM2454223	Meta-testing cohort 2_111	2.05479	1	1	1	0	2	1.26591	high
GSM340647	Meta-testing cohort 2_112	7.63014	0	1	1	1	1	0.887448	low
BL001	Meta-testing cohort 2_113	0.263014	1	NA	NA	NA	NA	0.343574	low
GSM814055	Meta-testing cohort 2_114	1.26463	0	2	1	1	1	6.64531	high
GSM3689080	Meta-testing cohort 2_115	0.246575	0	NA	1	0	2	1.1743	high
GSM3689116	Meta-testing cohort 2_116	1.01096	1	NA	1	1	2	0.30251	low
GSM4974826	Meta-testing cohort 2_117	4.93151	0	NA	NA	0	2	3.70346	high
TCGA_K4_A54R	Meta-testing cohort 2_118	2.30685	0	1	1	2	2	1.11582	high
TCGA_BT_A20W	Meta-testing cohort 2_119	0.69589	1	2	1	2	2	1.11582	high
U1480	Meta-testing cohort 2_12	0.715068	1	2	2	1	2	1.54527	high
GSM814203	Meta-testing cohort 2_120	5.36926	0	1	2	0	1	0.928711	low
GSM3689025	Meta-testing cohort 2_121	0.534247	0	NA	1	0	1	0.266186	low
GSM4974731	Meta-testing cohort 2_122	1.9726	0	NA	NA	1	2	1.51199	high
GSM1173924	Meta-testing cohort 2_123	4.29041	1	1	1	3	NA	0.34489	low
U1099	Meta-testing cohort 2_124	2.36712	0	2	2	1	2	0.767971	low
TCGA_FD_A3SR	Meta-testing cohort 2_125	1.64932	1	2	1	4	2	1.07677	high
SAM8533e5e261d6	Meta-testing cohort 2_126	1.05313	1	1	1	1	NA	1.96841	high
BL060	Meta-testing cohort 2_127	0.460274	1	NA	NA	NA	NA	0.265323	low
GSM786530	Meta-testing cohort 2_128	0.815504	1	2	2	3	2	0.822293	low
GSM2301881	Meta-testing cohort 2_129	1.20493	1	2	2	3	2	1.10434	high
GSM1173932	Meta-testing cohort 2_13	4.70959	1	2	1	2	NA	2.24173	high
GSM2301873	Meta-testing cohort 2_130	0.406849	1	2	1	3	2	3.08786	high
JMT1_34	Meta-testing cohort 2_131	2.13699	0	NA	NA	1	2	1.3936	high
BLCA_Nac_9	Meta-testing cohort 2_132	7.9726	0	1	1	3	2	1.62011	high
GSM1173911	Meta-testing cohort 2_133	0.468493	0	2	1	3	NA	1.2693	high
GSM814198	Meta-testing cohort 2_134	4.42349	0	1	1	1	2	1.54668	high
TCGA_ZF_A9RM	Meta-testing cohort 2_135	3.9863	0	2	1	2	2	1.49084	high
U0177	Meta-testing cohort 2_136	1.04384	0	1	2	0	2	0.817826	low
TCGA_DK_AA6U	Meta-testing cohort 2_137	1.58356	0	1	1	2	NA	3.2782	high
GSM4974730	Meta-testing cohort 2_138	4.93151	0	NA	NA	1	2	0.0743031	low
TCGA_PQ_A6FN	Meta-testing cohort 2_139	1.38904	0	2	2	3	2	2.23013	high
GSM340636	Meta-testing cohort 2_14	9.96164	0	2	2	2	2	0.470115	low
TCGA_XF_A9T2	Meta-testing cohort 2_140	1.57534	1	1	1	3	2	1.99127	high
GSM340690	Meta-testing cohort 2_141	4.7726	0	2	1	1	1	0.147811	low
SAMf2aae1443f67	Meta-testing cohort 2_142	0.850609	1	1	2	3	NA	0.733438	low
U0454	Meta-testing cohort 2_143	4.84932	0	2	1	0	2	0.343644	low
GSM786494	Meta-testing cohort 2_144	1.35017	1	1	1	3	2	1.73016	high
GSM4974785	Meta-testing cohort 2_145	4.76712	0	NA	NA	0	1	0.88477	low
GSM71028	Meta-testing cohort 2_146	0.682192	1	NA	NA	0	2	1.26591	high
TCGA_DK_A6B0	Meta-testing cohort 2_147	6.38356	0	1	1	2	2	0.288772	low
SAMdb3f50c9129c	Meta-testing cohort 2_148	1.29887	1	1	1	4	NA	1.27688	high
GSM4974732	Meta-testing cohort 2_149	1.15068	0	NA	NA	1	2	0.853096	low
GSM806816	Meta-testing cohort 2_15	4.62904	1	2	2	0	1	0.928711	low
SAM07a93a28f801	Meta-testing cohort 2_150	1.05584	0	1	1	2	NA	1.26814	high
GSM340720	Meta-testing cohort 2_151	2.30959	0	1	1	2	2	3.70346	high
U0555	Meta-testing cohort 2_152	1.5863	0	1	1	0	1	0.363804	low
SAMeb587a68006b	Meta-testing cohort 2_153	1.70122	0	1	1	2	NA	2.69814	high
GSM4974643	Meta-testing cohort 2_154	4.93151	0	NA	NA	0	1	0.839025	low
U0598	Meta-testing cohort 2_155	2.67945	0	2	2	1	2	0.172531	low
GSM786540	Meta-testing cohort 2_156	3.67247	0	1	1	3	2	1.97416	high
GSM3689060	Meta-testing cohort 2_157	1.28219	0	NA	1	1	2	0.877173	low
GSM806905	Meta-testing cohort 2_158	2.53479	0	2	2	0	1	1.13167	high
GSM4974650	Meta-testing cohort 2_159	2.13699	0	NA	NA	1	2	0.741459	low
TCGA_LT_A5Z6	Meta-testing cohort 2_16	1.29863	0	1	1	2	2	0.283569	low
p1419_200.CEL	Meta-testing cohort 2_160	7.15068	0	NA	NA	2	1	1.73016	high
GSM1167372	Meta-testing cohort 2_161	3.45205	1	2	NA	2	NA	1.05394	high
UCC_EU2015_37	Meta-testing cohort 2_162	3.06411	1	2	1	3	NA	0.244407	low
FR_99_U133_2.CEL	Meta-testing cohort 2_163	1.89041	1	1	1	3	2	0.928711	low
GSM2301861	Meta-testing cohort 2_164	1.38493	1	2	1	3	2	3.2708	high
BL130	Meta-testing cohort 2_165	0.279452	1	NA	NA	NA	NA	1.81134	high
GSM2301791	Meta-testing cohort 2_166	3.05342	1	2	1	3	2	1.83382	high
GSM814091	Meta-testing cohort 2_167	2.93729	0	2	1	0	1	2.69028	high
SAM1e9c4d1d39ae	Meta-testing cohort 2_168	1.02073	1	1	2	2	NA	0.11894	low
GSM4974776	Meta-testing cohort 2_169	4.43836	0	NA	NA	0	2	1.09372	high
GSM806813	Meta-testing cohort 2_17	6.08548	0	1	1	0	1	1.86411	high
FR_84_U133_2.CEL	Meta-testing cohort 2_170	0.739726	1	2	2	3	2	1.42802	high
U1265	Meta-testing cohort 2_171	2.4	0	2	2	0	1	0.0749901	low
BLCA_Cx_201	Meta-testing cohort 2_172	9.78082	0	2	2	3	2	0.442126	low
GSM4974714	Meta-testing cohort 2_173	2.21918	0	NA	NA	0	2	0.37296	low
GSM340723	Meta-testing cohort 2_174	1.2411	1	2	2	3	2	3.48573	high
GSM814241	Meta-testing cohort 2_175	0.532333	1	2	1	2	2	0.915985	low
JMT1_81	Meta-testing cohort 2_176	4.93151	0	NA	NA	1	2	1.47332	high
TCGA_K4_A6FZ	Meta-testing cohort 2_177	0.150685	0	2	2	3	2	1.41186	high
GSM814094	Meta-testing cohort 2_178	2.42387	1	1	1	2	2	2.2578	high
TCGA_ZF_A9RE	Meta-testing cohort 2_179	0.290411	1	2	2	2	2	2.69814	high
GSM814090	Meta-testing cohort 2_18	6.44744	0	1	1	2	2	1.69472	high
U0963	Meta-testing cohort 2_180	4.14247	0	2	2	3	2	1.22135	high
UCC22_primary	Meta-testing cohort 2_181	2.71644	0	2	2	2	NA	0.115279	low
U0583	Meta-testing cohort 2_182	3.34521	0	2	1	0	1	0.466272	low
BLCA_Nac_14	Meta-testing cohort 2_183	6.90411	0	1	1	3	2	0.34489	low
BLCA_Nac_90	Meta-testing cohort 2_184	6.16438	0	2	1	3	2	1.17553	high
BLCA_Nac_38	Meta-testing cohort 2_185	7.89041	0	2	1	2	2	1.53806	high
GSM2454222	Meta-testing cohort 2_186	11.5068	1	2	1	0	2	1.13167	high
GSM2454217	Meta-testing cohort 2_187	1.06849	1	2	2	0	1	0.782934	low
GSM2301887	Meta-testing cohort 2_188	10.4778	0	2	1	3	2	1.2693	high
SAM9681450bbc90	Meta-testing cohort 2_189	0.407752	1	1	1	3	NA	0.961476	low
GSM806825	Meta-testing cohort 2_19	5.48301	0	2	1	0	1	0.980958	low
GSM3699784	Meta-testing cohort 2_190	3.36986	0	2	1	0	2	3.70346	high
UCC_EU2015_55	Meta-testing cohort 2_191	2.0211	1	2	2	2	NA	0.347216	low
GSM814287	Meta-testing cohort 2_192	2.76975	0	2	1	2	2	0.601651	low
TCGA_GV_A3JX	Meta-testing cohort 2_193	1.59178	0	1	1	3	2	2.24173	high
U0080	Meta-testing cohort 2_194	3.28767	0	1	2	0	2	0.512244	low
GSM1709077	Meta-testing cohort 2_195	0.923836	0	2	NA	4	NA	0.906286	low
GSM814107	Meta-testing cohort 2_196	6.79872	0	1	1	1	2	1.6431	high
GSM814265	Meta-testing cohort 2_197	3.5696	0	2	2	1	2	1.52503	high
GSM1816515	Meta-testing cohort 2_198	21.4767	0	NA	NA	NA	NA	0.854607	low
SAMb470eb8f04be	Meta-testing cohort 2_199	1.64991	0	1	1	1	NA	0.634645	low
p1419_219.CEL	Meta-testing cohort 2_2	7.80822	0	NA	NA	2	2	0.34489	low
GSM1173931	Meta-testing cohort 2_20	0.452055	0	1	1	3	NA	1.2693	high
U0844	Meta-testing cohort 2_200	3.43562	0	1	1	0	1	0.934261	low
SAM6780ed436b55	Meta-testing cohort 2_201	0.513066	1	1	2	3	NA	0.470115	low
p1419_255.CEL	Meta-testing cohort 2_202	1.39726	1	NA	NA	2	2	0.705114	low
GSM3689002	Meta-testing cohort 2_203	1.87397	1	NA	1	3	2	5.11389	high
FR_179_U133_2.CEL	Meta-testing cohort 2_204	1.06849	1	2	1	3	2	1.02238	low
JMT1_4	Meta-testing cohort 2_205	3.27945	0	NA	NA	1	2	1.13511	high
U0587	Meta-testing cohort 2_206	1.95616	0	1	2	0	1	0.934261	low
GSM2454212	Meta-testing cohort 2_207	12.9863	0	1	2	0	1	2.21425	high
TCGA_ZF_A9RN	Meta-testing cohort 2_208	1.68493	1	2	2	3	2	0.474189	low
U0907	Meta-testing cohort 2_209	4.63562	0	2	2	1	2	0.608484	low
TCGA_FJ_A871	Meta-testing cohort 2_21	0.745205	1	1	1	3	2	2.15117	high
TCGA_BT_A3PH	Meta-testing cohort 2_210	0.389041	1	2	1	4	2	4.02244	high
TCGA_E7_A97Q	Meta-testing cohort 2_211	0.673973	1	1	2	4	2	2.43621	high
GSM2301833	Meta-testing cohort 2_212	2.80027	1	2	2	0	1	1.63414	high
GSM4974838	Meta-testing cohort 2_213	4.93151	0	NA	NA	0	1	0.711476	low
p1404_71.CEL	Meta-testing cohort 2_214	4.41539	0	NA	NA	1	1	1.41333	high
GSM786548	Meta-testing cohort 2_215	8.98945	1	2	1	2	2	1.26591	high
GSM2301850	Meta-testing cohort 2_216	3.79726	1	2	1	3	2	3.49592	high
BLCA_Cx_73	Meta-testing cohort 2_217	1.06849	1	2	1	3	2	0.164103	low
GSM4974770	Meta-testing cohort 2_218	4.93151	0	NA	NA	1	2	0.829416	low
GSM2454228	Meta-testing cohort 2_219	2.9589	0	2	2	0	1	1.20331	high
GSM1167429	Meta-testing cohort 2_22	3.09863	1	2	NA	3	NA	2.56151	high
BLCA_Nac_92	Meta-testing cohort 2_220	5.09589	0	2	1	3	2	1.11582	high
GSM3689165	Meta-testing cohort 2_221	3.65753	0	NA	1	0	2	3.2782	high
FR_36_U133_2_2.CEL	Meta-testing cohort 2_222	3.61644	0	1	1	2	2	0.328572	low
GSM786570	Meta-testing cohort 2_223	1.44739	1	2	1	3	2	0.808565	low
TCGA_XF_A9SP	Meta-testing cohort 2_224	1.24384	1	1	1	3	2	1.97416	high
U0037	Meta-testing cohort 2_225	2.97534	0	2	1	0	1	0.818599	low
GSM2301840	Meta-testing cohort 2_226	9.54493	0	1	1	0	2	0.961476	low
GSM4974734	Meta-testing cohort 2_227	3.53425	0	NA	NA	0	1	0.420261	low
U0590	Meta-testing cohort 2_228	3.55068	0	2	1	0	1	0.227506	low
TCGA_DK_A1AE	Meta-testing cohort 2_229	1.34521	0	2	1	3	2	1.1649	high
GSM806866	Meta-testing cohort 2_23	1.07836	0	2	1	1	1	0.928711	low
SAMb2f1d0e54ece	Meta-testing cohort 2_230	0.93702	1	1	1	4	NA	3.70998	high
GSM814109	Meta-testing cohort 2_231	5.71244	0	2	1	2	2	0.569779	low
GSM2301883	Meta-testing cohort 2_232	1.67096	1	2	2	3	2	5.19248	high
UCC_EU2015_64	Meta-testing cohort 2_233	0.738082	0	2	1	3	NA	0.166268	low
U0754	Meta-testing cohort 2_234	3.30411	0	1	1	0	1	0.288772	low
U0973	Meta-testing cohort 2_235	3.63288	0	2	1	0	1	0.160635	low
p1419_244.CEL	Meta-testing cohort 2_236	7.72603	0	NA	NA	2	2	1.20331	high
GSM1816540	Meta-testing cohort 2_237	13.2	0	NA	NA	NA	NA	1.6446	high
TCGA_BT_A20O	Meta-testing cohort 2_238	1.0137	1	2	1	3	2	0.603259	low
BLCA_Cx_101	Meta-testing cohort 2_239	8.54795	0	1	1	3	1	1.73016	high
GSM814293	Meta-testing cohort 2_24	2.25093	0	2	1	1	2	0.829416	low
GSM814181	Meta-testing cohort 2_240	0.0513417	0	2	1	1	2	0.90391	low
GSM71043	Meta-testing cohort 2_241	1.36438	1	NA	NA	0	2	1.09081	high
GSM340701	Meta-testing cohort 2_242	3.98082	0	1	2	3	2	1.04759	high
U1280	Meta-testing cohort 2_243	2.27671	0	1	2	0	1	0.470115	low
FR_97_U133_2_2.CEL	Meta-testing cohort 2_244	0.328767	0	2	2	3	2	0.980596	low
GSM4974658	Meta-testing cohort 2_245	4.93151	0	NA	NA	0	2	0.426911	low
SAM5a2347c0498a	Meta-testing cohort 2_246	0.402352	1	1	1	2	NA	0.232006	low
U0119	Meta-testing cohort 2_247	1.96438	0	2	1	0	1	1.49084	high
U1211	Meta-testing cohort 2_248	4.36438	0	2	1	3	2	0.631793	low
SAM1a87df750b9d	Meta-testing cohort 2_249	0.442857	1	1	1	3	NA	1.25118	high
SAMae4da274eded	Meta-testing cohort 2_25	0.410453	1	1	2	2	NA	0.616563	low
GSM1709079	Meta-testing cohort 2_250	3.02137	1	2	NA	0	NA	1.26591	high
GSM71033	Meta-testing cohort 2_251	3.36986	0	NA	NA	0	2	2.36031	high
GSM4974634	Meta-testing cohort 2_252	2.30137	0	NA	NA	0	1	1.62011	high
p1419_327.CEL	Meta-testing cohort 2_253	2.05479	1	NA	NA	2	2	2.73162	high
U0855	Meta-testing cohort 2_254	1.50411	0	2	1	1	2	0.790615	low
TCGA_YC_A9TC	Meta-testing cohort 2_255	0.0547945	1	2	1	4	2	0.239641	low
GSM814195	Meta-testing cohort 2_256	4.76938	0	1	1	3	2	1.86411	high
SAM5d1dfd5207f5	Meta-testing cohort 2_257	0.896515	1	1	1	1	NA	1.62444	high
U1179	Meta-testing cohort 2_258	2.92603	0	2	1	1	2	1.13167	high
TCGA_CF_A5U8	Meta-testing cohort 2_259	1.09315	0	1	1	2	1	0.710305	low
FR_242_U133_2.CEL	Meta-testing cohort 2_26	0.90411	1	1	1	3	2	2.56151	high
GSM3689152	Meta-testing cohort 2_260	0.830137	0	NA	1	1	2	1.63054	high
U0344	Meta-testing cohort 2_261	4.27397	0	2	1	0	1	0.34501	low
U0183	Meta-testing cohort 2_262	3.14795	0	2	2	1	1	0.233778	low
U1011	Meta-testing cohort 2_263	1.11781	0	1	1	0	2	0.382544	low
GSM1709087	Meta-testing cohort 2_264	4.11288	1	2	NA	0	NA	0.854607	low
GSM2301814	Meta-testing cohort 2_265	4.29863	1	2	1	2	2	1.32531	high
BLCA_Nac_91	Meta-testing cohort 2_266	6.65753	0	1	2	2	2	0.894447	low
GSM806826	Meta-testing cohort 2_267	8.03096	0	2	2	2	2	0.685608	low
GSM340732	Meta-testing cohort 2_268	0.583562	1	2	2	3	2	1.8434	high
TCGA_CF_A47W	Meta-testing cohort 2_269	1.00822	0	1	1	2	1	0.291773	low
U0433	Meta-testing cohort 2_27	1.98082	0	2	1	0	2	3.10516	high
p1419_262.CEL	Meta-testing cohort 2_270	1.80822	1	NA	NA	2	2	2.71449	high
GSM340767	Meta-testing cohort 2_271	0.824658	0	2	2	2	1	2.85833	high
GSM2301855	Meta-testing cohort 2_272	11.6984	0	2	1	1	2	0.537848	low
GSM1173979	Meta-testing cohort 2_273	1.01918	0	2	2	3	NA	0.74375	low
TCGA_ZF_A9R4	Meta-testing cohort 2_274	2.52329	0	2	1	2	2	1.13346	high
FR_127_U133_2_2.CEL	Meta-testing cohort 2_275	7.72603	1	2	1	2	2	1.96862	high
GSM1709095	Meta-testing cohort 2_276	3.84822	1	2	NA	0	NA	1.31926	high
GSM1173952	Meta-testing cohort 2_277	3.40274	1	2	2	3	NA	1.97944	high
GSM3699767	Meta-testing cohort 2_278	6.24658	1	1	1	0	2	0.425382	low
GSM814202	Meta-testing cohort 2_279	0.524226	1	2	1	2	2	0.39046	low
GSM4974647	Meta-testing cohort 2_28	3.86301	1	NA	NA	1	2	1.26591	high
GSM3689137	Meta-testing cohort 2_280	0.000273973	0	NA	1	1	2	1.02262	low
BLCA_Nac_57	Meta-testing cohort 2_281	6.65753	0	2	1	2	2	0.651645	low
GSM1816524	Meta-testing cohort 2_282	2.37534	0	NA	NA	NA	NA	1.63415	high
SAM771445e92421	Meta-testing cohort 2_283	1.5959	0	1	1	3	NA	1.15155	high
GSM340691.y	Meta-testing cohort 2_284	5.67123	0	1	2	1	1	1.40151	high
GSM4974726	Meta-testing cohort 2_285	2.79452	0	NA	NA	0	1	0.692897	low
GSM1709078	Meta-testing cohort 2_286	0.980548	0	1	NA	4	NA	0.859515	low
TCGA_E7_A678	Meta-testing cohort 2_287	2.1863	0	1	1	3	1	0.286831	low
U0538	Meta-testing cohort 2_288	3.57534	0	2	1	0	1	1.19886	high
GSM1173925	Meta-testing cohort 2_289	5.46575	1	1	1	3	NA	2.24173	high
U1403	Meta-testing cohort 2_29	2.70411	0	1	2	0	1	0.225871	low
GSM340719.y	Meta-testing cohort 2_290	3.92055	0	1	1	1	1	1.62011	high
BLCA_Nac_95	Meta-testing cohort 2_291	5.75342	0	1	1	2	2	2.10826	high
GSM1173940	Meta-testing cohort 2_292	11.1205	1	2	1	3	NA	3.28882	high
U1412	Meta-testing cohort 2_293	0.871233	0	1	1	0	1	1.07341	high
GSM4974786	Meta-testing cohort 2_294	4.93151	0	NA	NA	0	1	0.72859	low
TCGA_DK_AA6W	Meta-testing cohort 2_295	1.13699	1	2	1	2	2	2.56151	high
GSM340698	Meta-testing cohort 2_296	2.34493	1	2	1	1	2	3.77665	high
GSM3689098	Meta-testing cohort 2_297	0.000273973	0	NA	1	0	1	1.54668	high
FR_252_U133_2.CEL	Meta-testing cohort 2_298	7.15068	1	1	1	2	2	1.55333	high
GSM3689033	Meta-testing cohort 2_299	0.000273973	0	NA	2	1	2	1.46299	high
GSM814134	Meta-testing cohort 2_3	2.9562	0	2	1	0	1	0.478243	low
GSM3689047	Meta-testing cohort 2_30	0.000273973	0	NA	2	1	2	0.692897	low
U1305	Meta-testing cohort 2_300	2.26849	0	1	1	0	1	0.244407	low
GSM806818	Meta-testing cohort 2_301	0.837681	0	2	1	0	1	1.87527	high
U0915	Meta-testing cohort 2_302	3.69041	0	1	2	0	1	0.427994	low
SAM3894ac3956a5	Meta-testing cohort 2_303	0.172822	0	1	1	1	NA	2.21425	high
U1297	Meta-testing cohort 2_304	1.13425	0	2	1	0	2	0.466272	low
TCGA_UY_A78O	Meta-testing cohort 2_305	6.33425	0	2	2	2	2	1.96841	high
GSM1709103	Meta-testing cohort 2_306	4.91425	1	1	NA	1	NA	2.56471	high
BL118	Meta-testing cohort 2_307	0.29589	1	NA	NA	NA	NA	2.69814	high
GSM806872	Meta-testing cohort 2_308	0.507945	1	2	1	2	2	2.72175	high
TCGA_2F_A9KT	Meta-testing cohort 2_309	9.07945	0	2	1	2	2	2.75982	high
GSM119714	Meta-testing cohort 2_31	3.12329	0	NA	NA	3	NA	0.861189	low
GSM340694	Meta-testing cohort 2_310	4.56164	0	2	1	2	2	1.14753	high
SAM1dda30f1c5be	Meta-testing cohort 2_311	1.74712	0	1	1	2	NA	6.64531	high
TCGA_4Z_AA83	Meta-testing cohort 2_312	5.54521	0	1	1	2	2	1.45271	high
GSM814201	Meta-testing cohort 2_313	5.01798	0	2	1	0	1	1.20602	high
GSM1709102	Meta-testing cohort 2_314	3.14877	1	2	NA	2	NA	0.751274	low
GSM814057	Meta-testing cohort 2_315	8.57947	0	2	1	1	1	0.961476	low
GSM1167376	Meta-testing cohort 2_316	3.80548	0	2	NA	3	NA	1.53346	high
TCGA_GD_A2C5	Meta-testing cohort 2_317	2.22466	0	1	2	4	2	1.11582	high
TCGA_XF_AAN5	Meta-testing cohort 2_318	6.28219	0	1	2	3	2	1.77992	high
UCC_EU2015_17	Meta-testing cohort 2_319	2.94	0	1	1	2	NA	0.835186	low
BLCA_Cx_156	Meta-testing cohort 2_32	0.493151	1	2	1	3	2	0.467053	low
GSM814261	Meta-testing cohort 2_320	3.46151	0	2	2	0	1	0.931282	low
TCGA_XF_A9SW	Meta-testing cohort 2_321	0.991781	1	2	1	4	2	1.93164	high
GSM2301830	Meta-testing cohort 2_322	15.7266	0	1	2	3	2	1.09081	high
GSM2301851	Meta-testing cohort 2_323	1.79753	1	2	1	0	2	0.289279	low
GSM806874	Meta-testing cohort 2_324	4.94466	1	1	1	1	2	1.62011	high
TCGA_GV_A3JW	Meta-testing cohort 2_325	1.77808	0	2	1	2	2	1.53806	high
GSM814112	Meta-testing cohort 2_326	6.97977	0	2	1	0	1	0.877173	low
GSM1167339	Meta-testing cohort 2_327	0.624658	0	2	NA	3	NA	1.02679	high
U0067	Meta-testing cohort 2_328	2.63014	0	2	1	1	2	1.73016	high
U0615	Meta-testing cohort 2_329	3.08219	0	2	1	0	1	0.197773	low
GSM3689077	Meta-testing cohort 2_33	0.000273973	0	NA	1	1	2	1.83382	high
TCGA_FD_A3B7	Meta-testing cohort 2_330	0.334247	1	2	1	3	2	1.68563	high
GSM1816529	Meta-testing cohort 2_331	3.3863	0	NA	NA	NA	NA	1.11582	high
GSM340699	Meta-testing cohort 2_332	1.44932	1	2	1	1	1	0.420505	low
BL035	Meta-testing cohort 2_333	1.48767	0	NA	NA	NA	NA	0.302938	low
JMT1_46	Meta-testing cohort 2_334	2.60548	0	NA	NA	1	2	0.968684	low
U1231	Meta-testing cohort 2_335	2.30137	0	1	2	0	1	0.125878	low
U0330	Meta-testing cohort 2_336	4.00274	0	2	1	0	2	0.658914	low
SAMba1a34b5a060	Meta-testing cohort 2_337	1.05584	1	1	1	3	NA	0.950763	low
GSM340646.y	Meta-testing cohort 2_338	4.25753	0	2	2	1	2	2.10212	high
GSM4974724	Meta-testing cohort 2_339	4.93151	0	NA	NA	0	1	1.53806	high
TCGA_ZF_A9RL	Meta-testing cohort 2_34	7.40548	0	1	1	2	2	1.04137	high
GSM1816519	Meta-testing cohort 2_340	1.19178	0	NA	NA	NA	NA	0.85233	low
GSM3689114	Meta-testing cohort 2_341	0.254795	0	NA	1	1	2	0.894447	low
GSM340608.y	Meta-testing cohort 2_342	2.21096	0	2	1	1	1	0.562325	low
BLCA_Cx_204	Meta-testing cohort 2_343	0.986301	1	1	1	4	2	0.944479	low
GSM814307	Meta-testing cohort 2_344	2.17527	0	1	1	0	2	1.73016	high
GSM814308	Meta-testing cohort 2_345	2.30497	0	2	1	0	1	0.694297	low
GSM786581	Meta-testing cohort 2_346	5.90566	0	2	2	2	2	1.96841	high
GSM806808	Meta-testing cohort 2_347	1.0537	0	2	1	0	1	0.534777	low
TCGA_HQ_A2OF	Meta-testing cohort 2_348	5.33425	0	1	2	3	2	1.53806	high
GSM814212	Meta-testing cohort 2_349	5.13958	0	2	1	0	1	1.62444	high
GSM1816532	Meta-testing cohort 2_35	13.989	0	NA	NA	NA	NA	2.91481	high
U0553	Meta-testing cohort 2_350	3.46027	0	2	1	1	2	0.326295	low
GSM4974772	Meta-testing cohort 2_351	4.93151	0	NA	NA	0	1	0.764263	low
GSM119721	Meta-testing cohort 2_352	13.1507	0	NA	NA	3	NA	1.13843	high
GSM340624	Meta-testing cohort 2_353	5.41918	1	2	1	1	1	0.648014	low
U0204	Meta-testing cohort 2_354	4.98082	0	1	1	0	1	0.55721	low
U1248	Meta-testing cohort 2_355	3.37808	0	1	2	0	1	0.137372	low
GSM1173934	Meta-testing cohort 2_356	2.79452	0	2	2	3	NA	1.99866	high
GSM2301805	Meta-testing cohort 2_357	3.40603	0	1	1	0	1	1.73016	high
TCGA_YC_A89H	Meta-testing cohort 2_358	1.56986	0	2	2	2	2	1.20331	high
GSM1816541	Meta-testing cohort 2_359	1.29041	0	NA	NA	NA	NA	1.19886	high
GSM340754.y	Meta-testing cohort 2_36	2.59726	0	1	1	1	1	1.18856	high
GSM3689189	Meta-testing cohort 2_360	1.53699	0	NA	1	1	NA	0.400377	low
GSM3689138	Meta-testing cohort 2_361	0.147945	0	NA	1	1	2	1.99127	high
GSM4974707	Meta-testing cohort 2_362	3.20548	0	NA	NA	1	2	0.784932	low
TCGA_FD_A43Y	Meta-testing cohort 2_363	1.29863	1	2	1	3	2	1.7401	high
TCGA_FD_A3B8	Meta-testing cohort 2_364	1.05205	0	1	1	2	2	1.56308	high
GSM4974823	Meta-testing cohort 2_365	3.20548	0	NA	NA	1	2	0.382382	low
U0624	Meta-testing cohort 2_366	2.36712	0	1	1	1	1	1.4483	high
U0655	Meta-testing cohort 2_367	2.23562	0	1	1	1	2	0.453141	low
GSM71067	Meta-testing cohort 2_368	4.93151	0	NA	NA	1	2	0.273615	low
GSM3689182	Meta-testing cohort 2_369	1.70959	0	NA	1	1	2	0.544401	low
TCGA_DK_A6B2	Meta-testing cohort 2_37	1.30685	0	2	1	4	2	1.39079	high
SAMaec7380f9ab0	Meta-testing cohort 2_370	1.71472	0	1	1	4	NA	0.289008	low
GSM340764	Meta-testing cohort 2_371	1.26301	0	1	1	3	1	1.49084	high
BLCA_Nac_25	Meta-testing cohort 2_372	6	0	2	1	2	2	1.83918	high
GSM4974780	Meta-testing cohort 2_373	2.30137	0	NA	NA	1	2	0.537848	low
GSM814286	Meta-testing cohort 2_374	2.79947	0	2	1	1	1	0.704486	low
GSM340749.y	Meta-testing cohort 2_375	1.77534	0	1	1	1	1	0.822462	low
FR_254_U133_2.CEL	Meta-testing cohort 2_376	1.72603	1	1	1	3	2	1.34928	high
GSM4974711	Meta-testing cohort 2_377	0.739726	1	NA	NA	1	2	0.631793	low
GSM2454210	Meta-testing cohort 2_378	13.5616	0	2	2	0	1	0.627919	low
BLCA_Nac_26	Meta-testing cohort 2_379	4.84932	0	2	1	2	2	1.50934	high
TCGA_GD_A3OP	Meta-testing cohort 2_38	0.175342	0	2	2	4	2	1.11582	high
GSM4974654	Meta-testing cohort 2_380	4.93151	0	NA	NA	0	1	0.877173	low
GSM814354	Meta-testing cohort 2_381	1.40244	0	2	1	2	2	2.4979	high
GSM1816533	Meta-testing cohort 2_382	3.41096	1	NA	NA	NA	NA	2.21425	high
TCGA_GU_A764	Meta-testing cohort 2_383	1.67123	0	2	1	2	2	2.18122	high
TCGA_DK_A3WW	Meta-testing cohort 2_384	1.73425	0	1	1	3	2	0.776658	low
GSM1173982	Meta-testing cohort 2_385	1.9726	1	2	2	0	NA	1.73016	high
GSM786559	Meta-testing cohort 2_386	7.51776	0	2	2	1	2	0.957917	low
U0839	Meta-testing cohort 2_387	1.49589	0	2	1	0	2	2.69814	high
GSM1816547	Meta-testing cohort 2_388	1.59452	0	NA	NA	NA	NA	1.4483	high
GSM814226	Meta-testing cohort 2_389	1.74021	0	1	2	0	1	0.671155	low
U0328	Meta-testing cohort 2_39	5.99178	0	2	1	0	2	0.428785	low
GSM814266	Meta-testing cohort 2_390	3.39126	0	1	2	0	1	0.617767	low
U1150	Meta-testing cohort 2_391	2.23562	0	1	1	0	1	1.0539	high
GSM2301877	Meta-testing cohort 2_392	7.1063	1	1	1	3	2	1.62011	high
GSM814297	Meta-testing cohort 2_393	2.57519	0	2	1	0	1	0.685401	low
SAM0ce9c983b20f	Meta-testing cohort 2_394	0.54277	1	1	1	3	NA	1.24655	high
U0560	Meta-testing cohort 2_395	3.40274	0	1	2	0	1	0.340663	low
FR_106_U133_2.CEL	Meta-testing cohort 2_396	0.986301	1	1	1	3	2	1.71537	high
GSM4974686	Meta-testing cohort 2_397	4.76712	0	NA	NA	1	2	1.83552	high
GSM3689092	Meta-testing cohort 2_398	2.33425	0	NA	1	0	1	0.340663	low
U0126	Meta-testing cohort 2_399	2.41644	0	2	2	0	2	0.742065	low
GSM3689102	Meta-testing cohort 2_4	0.000273973	0	NA	1	NA	NA	0.877173	low
SAM39eb94fa504d	Meta-testing cohort 2_40	1.47169	1	1	1	3	NA	1.8238	high
GSM1173942	Meta-testing cohort 2_400	4.3726	1	2	1	3	NA	2.09695	high
BLCA_Cx_244	Meta-testing cohort 2_401	7.72603	0	2	1	3	2	0.467734	low
TCGA_GU_A42R	Meta-testing cohort 2_402	1.58082	1	2	1	4	2	0.835186	low
GSM1173974	Meta-testing cohort 2_403	3.90411	0	2	1	3	NA	3.2782	high
GSM4974762	Meta-testing cohort 2_404	4.93151	0	NA	NA	0	1	1.47074	high
U0551	Meta-testing cohort 2_405	1.47945	0	2	1	1	2	0.685401	low
BLCA_Nac_123	Meta-testing cohort 2_406	5.0137	1	1	1	3	2	0.150607	low
GSM4974803	Meta-testing cohort 2_407	4.93151	0	NA	NA	0	1	0.401775	low
GSM4974846	Meta-testing cohort 2_408	3.28767	0	NA	NA	0	1	0.861189	low
GSM340685	Meta-testing cohort 2_409	4.92055	1	2	1	1	1	0.611344	low
GSM340652.x	Meta-testing cohort 2_41	5.41918	1	2	1	1	1	1.2693	high
GSM814196	Meta-testing cohort 2_410	4.16679	0	2	2	0	1	1.73016	high
GSM786505	Meta-testing cohort 2_411	0.256533	1	2	2	3	2	2.35377	high
U1206	Meta-testing cohort 2_412	2.14521	0	2	1	0	1	1.01379	low
GSM1173930	Meta-testing cohort 2_413	2.6137	0	1	1	3	NA	0.631793	low
U0434	Meta-testing cohort 2_414	0.263014	1	2	1	1	2	0.6665	low
SAM14938611a2d3	Meta-testing cohort 2_415	1.76063	0	1	1	2	NA	0.516612	low
GSM4974677	Meta-testing cohort 2_416	4.93151	0	NA	NA	0	2	0.912786	low
GSM806921	Meta-testing cohort 2_417	4.6126	0	2	1	1	2	1.83918	high
GSM2301900	Meta-testing cohort 2_418	8.9737	1	2	2	3	2	0.705367	low
GSM1173908	Meta-testing cohort 2_419	3.80548	1	1	1	3	NA	1.14672	high
GSM2301828	Meta-testing cohort 2_42	9.77671	0	2	1	0	1	0.704486	low
TCGA_CF_A27C	Meta-testing cohort 2_420	1.16438	0	1	1	3	2	2.56151	high
TCGA_GC_A3WC	Meta-testing cohort 2_421	1.47945	0	2	2	3	2	1.11582	high
GSM3699749	Meta-testing cohort 2_422	6.41096	1	2	1	0	1	0.778734	low
GSM340623	Meta-testing cohort 2_423	0.257534	1	2	2	4	2	1.07921	high
GSM1816534	Meta-testing cohort 2_424	1.59452	0	NA	NA	NA	NA	2.86895	high
JMT1_77	Meta-testing cohort 2_425	3.94521	0	NA	NA	1	2	0.840571	low
GSM4974710	Meta-testing cohort 2_426	3.53425	0	NA	NA	0	2	2.48622	high
GSM806836	Meta-testing cohort 2_427	7.54993	0	2	1	0	2	1.54256	high
U1415	Meta-testing cohort 2_428	0.106849	1	2	1	1	2	0.114504	low
TCGA_CF_A47Y	Meta-testing cohort 2_429	1.02192	0	1	1	2	1	1.13511	high
TCGA_XF_A9SK	Meta-testing cohort 2_43	1.33151	1	2	1	4	2	5.14789	high
BLCA_Nac_98	Meta-testing cohort 2_430	0.657534	1	2	1	3	2	1.25118	high
p1419_242.CEL	Meta-testing cohort 2_431	0.807956	1	NA	NA	2	2	1.53629	high
GSM786531	Meta-testing cohort 2_432	8.43588	1	2	1	3	2	6.64531	high
U0765	Meta-testing cohort 2_433	1.86575	0	1	1	1	1	0.613842	low
GSM814170	Meta-testing cohort 2_434	6.08805	0	2	1	1	2	1.73016	high
GSM3689162	Meta-testing cohort 2_435	0.616438	0	NA	1	0	1	1.4483	high
SAMbda79f955628	Meta-testing cohort 2_436	1.69582	0	1	2	2	NA	0.346951	low
GSM3689036	Meta-testing cohort 2_437	0.000273973	0	NA	1	1	2	0.648075	low
U0556	Meta-testing cohort 2_438	3.46027	0	1	1	1	2	0.29977	low
SAM49d48750e294	Meta-testing cohort 2_439	0.810104	1	1	1	2	NA	3.76267	high
GSM3699788	Meta-testing cohort 2_44	1.89041	0	1	2	0	1	0.961476	low
GSM806893	Meta-testing cohort 2_440	6.10932	0	2	1	1	2	1.22135	high
GSM340683.x	Meta-testing cohort 2_441	4.89863	0	1	1	1	1	2.69814	high
TCGA_XF_A9SI	Meta-testing cohort 2_442	6.63836	0	2	2	2	2	0.608484	low
GSM1167398	Meta-testing cohort 2_443	0.534247	0	1	NA	4	NA	2.55787	high
BLCA_Nac_124	Meta-testing cohort 2_444	5.17808	1	2	2	3	1	0.910217	low
GSM814118	Meta-testing cohort 2_445	4.46403	0	1	1	0	1	0.450332	low
GSM1167410	Meta-testing cohort 2_446	2.3589	0	2	NA	2	NA	6.64531	high
GSM814087	Meta-testing cohort 2_447	6.73387	1	1	1	0	1	1.04454	high
GSM4974749	Meta-testing cohort 2_448	4.93151	0	NA	NA	1	2	4.00755	high
GSM340750	Meta-testing cohort 2_449	1.7589	0	2	1	0	1	1.88224	high
GSM1816506	Meta-testing cohort 2_45	22.5699	1	NA	NA	NA	NA	0.544401	low
U0497	Meta-testing cohort 2_450	4.98082	0	2	2	0	1	0.397794	low
GSM340751.x	Meta-testing cohort 2_451	4.75616	0	1	1	1	1	1.55139	high
GSM3689154	Meta-testing cohort 2_452	0.000273973	0	NA	1	1	2	2.78721	high
GSM1167361	Meta-testing cohort 2_453	4.36438	1	1	NA	3	NA	3.70346	high
GSM806871	Meta-testing cohort 2_454	5.39096	0	2	1	1	1	0.806446	low
TCGA_XF_A9T6	Meta-testing cohort 2_455	0.175342	0	2	2	3	2	0.260368	low
U0181	Meta-testing cohort 2_456	1.45479	0	2	1	0	2	1.62011	high
GSM814069	Meta-testing cohort 2_457	6.08534	0	1	1	0	1	0.27525	low
GSM806922	Meta-testing cohort 2_458	4.62082	0	1	1	2	2	0.422773	low
UCC_EU2015_57	Meta-testing cohort 2_459	4.4063	1	2	1	3	NA	0.329754	low
GSM806814	Meta-testing cohort 2_46	2.10247	0	2	2	2	2	1.56308	high
GSM814117	Meta-testing cohort 2_460	3.11293	0	2	2	1	1	1.45696	high
BLCA_Nac_109	Meta-testing cohort 2_461	2.21918	1	2	1	3	2	0.425382	low
GSM1173947	Meta-testing cohort 2_462	2.80274	1	1	1	3	NA	1.73016	high
GSM814267	Meta-testing cohort 2_463	3.62094	0	2	1	0	1	2.23343	high
GSM814138	Meta-testing cohort 2_464	0.508013	1	2	1	3	2	2.72175	high
GSM4974842	Meta-testing cohort 2_465	2.63014	0	NA	NA	1	2	1.13167	high
SAM4581bac493af	Meta-testing cohort 2_466	1.64721	0	1	1	2	NA	0.571183	low
GSM340683.y	Meta-testing cohort 2_467	5.81918	0	1	1	1	1	3.97314	high
GSM2301827	Meta-testing cohort 2_468	3.1989	0	1	1	3	2	0.985266	low
GSM2301844	Meta-testing cohort 2_469	10.8625	0	2	1	0	1	0.441389	low
SAMbc8dc3a7b54e	Meta-testing cohort 2_47	1.21246	1	1	2	2	NA	1.87419	high
GSM814280	Meta-testing cohort 2_470	2.90756	0	2	2	1	2	0.81502	low
GSM4974778	Meta-testing cohort 2_471	4.43836	0	NA	NA	1	2	2.10826	high
GSM1167468	Meta-testing cohort 2_472	5.02192	1	2	NA	2	NA	1.41434	high
GSM340651	Meta-testing cohort 2_473	11.0934	1	2	1	1	1	3.2782	high
GSM4974748	Meta-testing cohort 2_474	1.72603	0	NA	NA	0	2	1.97944	high
U1396	Meta-testing cohort 2_475	0.164384	1	2	1	1	2	0.228171	low
GSM786539	Meta-testing cohort 2_476	9.92647	0	2	2	0	2	1.10214	high
BLCA_Nac_6	Meta-testing cohort 2_477	0.328767	1	2	1	3	2	0.850823	low
SAM961d04c42bd9	Meta-testing cohort 2_478	0.483362	1	1	1	1	NA	0.425382	low
BLCA_Nac_19	Meta-testing cohort 2_479	0.90411	1	2	2	3	2	1.62444	high
GSM2454209	Meta-testing cohort 2_48	15.0411	0	1	1	0	1	1.00345	low
TCGA_CF_A1HR	Meta-testing cohort 2_480	1.06575	0	1	1	3	2	0.954229	low
U1006	Meta-testing cohort 2_481	1.20822	0	2	1	0	1	1.32919	high
U0648	Meta-testing cohort 2_482	3.64932	0	2	1	0	1	0.376678	low
U0427	Meta-testing cohort 2_483	4.8411	0	2	1	0	2	0.548072	low
GSM340760	Meta-testing cohort 2_484	1.09041	1	2	1	3	2	2.10212	high
GSM1709091	Meta-testing cohort 2_485	4.43096	1	1	NA	0	NA	1.31711	high
GSM71059	Meta-testing cohort 2_486	4.93151	0	NA	NA	0	1	1.04633	high
GSM71065	Meta-testing cohort 2_487	0.739726	1	NA	NA	0	2	1.27499	high
BL033	Meta-testing cohort 2_488	2.47397	0	NA	NA	NA	NA	0.471372	low
FR_269_U133_2.CEL	Meta-testing cohort 2_489	1.72603	1	2	1	3	1	0.608484	low
GSM340609	Meta-testing cohort 2_49	7.15616	1	2	1	1	1	0.651645	low
U0709	Meta-testing cohort 2_490	0.29589	1	2	1	1	2	1.8691	high
TCGA_DK_A3IU	Meta-testing cohort 2_491	1.93425	1	1	1	2	2	1.14672	high
FR_15_U133_2.CEL	Meta-testing cohort 2_492	4.35616	0	2	2	3	2	3.9902	high
U0219	Meta-testing cohort 2_493	3.36986	0	2	1	0	1	0.616957	low
GSM814140	Meta-testing cohort 2_494	4.94502	1	1	1	1	2	1.49084	high
GSM340686.y	Meta-testing cohort 2_495	5.76986	0	2	1	1	1	0.359377	low
GSM814062	Meta-testing cohort 2_496	0.540439	0	2	1	1	1	1.14672	high
BLCA_Nac_111	Meta-testing cohort 2_497	4.60274	1	1	1	3	2	0.928711	low
TCGA_FD_A3SO	Meta-testing cohort 2_498	0.460274	1	2	1	4	2	2.23458	high
GSM814174	Meta-testing cohort 2_499	1.20788	0	2	2	0	1	0.369568	low
GSM814342	Meta-testing cohort 2_5	0.705273	0	2	1	0	1	0.325751	low
GSM814084	Meta-testing cohort 2_50	5.48275	0	2	1	0	1	1.20367	high
SAM6cbc10abddb0	Meta-testing cohort 2_500	0.488763	1	1	1	3	NA	0.844321	low
U0412	Meta-testing cohort 2_501	2.83562	0	2	1	0	1	0.792005	low
TCGA_CU_A3YL	Meta-testing cohort 2_502	2.48219	0	2	1	3	2	0.769587	low
GSM786499	Meta-testing cohort 2_503	8.91384	1	1	1	2	2	1.73016	high
GSM340706	Meta-testing cohort 2_504	3.70959	0	2	1	2	2	1.83918	high
GSM2301897	Meta-testing cohort 2_505	0.603288	1	1	1	2	2	1.07677	high
U1346	Meta-testing cohort 2_506	2.07945	0	2	2	0	2	1.20331	high
GSM3688999	Meta-testing cohort 2_507	1.25753	0	NA	2	1	2	1.2975	high
U1303	Meta-testing cohort 2_508	2.16164	0	1	1	0	2	0.794272	low
BL126	Meta-testing cohort 2_509	3.08219	0	NA	NA	NA	NA	1.19566	high
UCC17_primary	Meta-testing cohort 2_51	2.94	0	1	1	2	NA	0.521526	low
TCGA_DK_AA6R	Meta-testing cohort 2_510	13.811	0	2	1	4	2	2.69871	high
GSM340659.x	Meta-testing cohort 2_511	5.83014	1	1	1	1	1	0.440838	low
BL051	Meta-testing cohort 2_512	0.115068	1	NA	NA	NA	NA	1.31408	high
BL121	Meta-testing cohort 2_513	3.13973	0	NA	NA	NA	NA	1.35464	high
SAM9725303dce0c	Meta-testing cohort 2_514	0.731794	0	1	1	2	NA	0.474695	low
GSM340660	Meta-testing cohort 2_515	6.70959	0	1	1	2	1	2.21425	high
JMT1_44	Meta-testing cohort 2_516	1.29863	0	NA	NA	1	2	1.26077	high
GSM340628	Meta-testing cohort 2_517	9.90411	0	1	1	3	2	2.11419	high
GSM1173981	Meta-testing cohort 2_518	2.08767	0	1	2	3	NA	1.26345	high
TCGA_GV_A3JV	Meta-testing cohort 2_519	1.18904	1	2	1	4	2	0.510902	low
BLCA_Nac_129	Meta-testing cohort 2_52	6	0	2	1	3	2	0.649153	low
GSM2454234	Meta-testing cohort 2_520	10.1918	1	1	1	0	2	1.54256	high
TCGA_DK_A3IV	Meta-testing cohort 2_521	0.805479	1	1	1	2	2	1.69472	high
GSM4974832	Meta-testing cohort 2_522	1.56164	0	NA	NA	0	1	0.625294	low
GSM3689179	Meta-testing cohort 2_523	0.000273973	0	NA	1	1	2	0.892599	low
BLCA_Nac_3	Meta-testing cohort 2_524	3.78082	1	2	1	3	2	0.635569	low
BLCA_Nac_27	Meta-testing cohort 2_525	5.67123	0	1	1	2	2	0.800248	low
JMT1_13	Meta-testing cohort 2_526	5.46575	0	NA	NA	1	2	2.73162	high
U1277	Meta-testing cohort 2_527	1.94795	0	2	1	0	2	0.901598	low
GSM2301822	Meta-testing cohort 2_528	1.32329	1	1	1	1	1	1.54668	high
BL128	Meta-testing cohort 2_529	0.394521	0	NA	NA	NA	NA	2.004	high
TCGA_E7_A7XN	Meta-testing cohort 2_53	1.1726	0	2	1	3	2	1.57153	high
TCGA_BT_A0YX	Meta-testing cohort 2_530	1.09589	1	2	2	3	2	0.90524	low
BLCA_Nac_138	Meta-testing cohort 2_531	3.69863	1	1	2	2	2	2.10826	high
GSM1167360	Meta-testing cohort 2_532	0.863014	0	2	NA	4	NA	2.15116	high
TCGA_GD_A3OS	Meta-testing cohort 2_533	1.74795	0	1	2	2	2	3.2782	high
SAM065890737112	Meta-testing cohort 2_534	1.64991	0	1	1	2	NA	0.601651	low
GSM340622	Meta-testing cohort 2_535	10.2356	0	1	1	0	1	2.69028	high
TCGA_XF_AAN3	Meta-testing cohort 2_536	7.19178	0	2	1	4	2	1.99658	high
BL108	Meta-testing cohort 2_537	5.92603	0	NA	NA	NA	NA	2.73162	high
GSM806833	Meta-testing cohort 2_538	2.93753	0	2	1	0	1	1.18856	high
U1032	Meta-testing cohort 2_539	4.44658	0	1	2	0	1	1.26814	high
BLCA_Nac_15	Meta-testing cohort 2_54	5.75342	0	1	1	3	2	1.33274	high
GSM786538	Meta-testing cohort 2_540	5.29268	1	2	1	2	2	2.55787	high
GSM814085	Meta-testing cohort 2_541	8.03093	0	2	2	2	2	0.507866	low
SAM7bff231634e9	Meta-testing cohort 2_542	0.842508	1	1	1	3	NA	1.25118	high
U0199	Meta-testing cohort 2_543	6.03288	0	1	1	0	2	0.325206	low
TCGA_XF_AAMW	Meta-testing cohort 2_544	0.693151	1	2	2	4	2	2.55521	high
GSM2301849	Meta-testing cohort 2_545	9.43151	1	1	1	0	2	1.62444	high
GSM814345	Meta-testing cohort 2_546	0.540439	0	2	1	0	1	0.685401	low
GSM340632.x	Meta-testing cohort 2_547	9.91233	0	1	1	1	1	2.05136	high
JMT1_11	Meta-testing cohort 2_548	4.84932	0	NA	NA	1	2	0.587124	low
GSM3689042	Meta-testing cohort 2_549	0.263014	0	NA	1	0	1	1.2693	high
GSM340670	Meta-testing cohort 2_55	6.09589	0	1	1	0	1	1.2673	high
U0600	Meta-testing cohort 2_550	4.10959	0	2	1	0	1	0.430053	low
U0110	Meta-testing cohort 2_551	2.93425	0	2	1	0	1	0.140736	low
GSM806848	Meta-testing cohort 2_552	7.32295	0	2	1	0	1	0.975131	low
GSM814071	Meta-testing cohort 2_553	5.49897	0	1	2	1	1	1.41534	high
GSM340632.y	Meta-testing cohort 2_554	10.8329	0	1	1	1	1	0.974273	low
GSM786551	Meta-testing cohort 2_555	8.43048	0	2	2	3	2	1.7401	high
GSM786510	Meta-testing cohort 2_556	0.675086	1	1	1	3	2	1.27499	high
TCGA_2F_A9KO	Meta-testing cohort 2_557	2.01096	1	1	1	4	2	1.31711	high
GSM1167373	Meta-testing cohort 2_558	3.92877	1	2	NA	2	NA	0.573184	low
U1162	Meta-testing cohort 2_559	1.21644	0	1	1	0	2	0.808565	low
GSM3689190	Meta-testing cohort 2_56	2.95068	1	NA	1	2	2	0.86696	low
U0089	Meta-testing cohort 2_560	2.68767	0	2	1	0	1	1.99126	high
U1458	Meta-testing cohort 2_561	0.534247	0	2	1	1	1	0.256694	low
SAMdad5c29dc105	Meta-testing cohort 2_562	0.199826	1	1	1	2	NA	1.54668	high
TCGA_4Z_AA82	Meta-testing cohort 2_563	4.26301	1	1	1	4	2	1.50375	high
GSM806930	Meta-testing cohort 2_564	3.79644	0	1	1	1	2	1.81664	high
GSM4974752	Meta-testing cohort 2_565	1.72603	1	NA	NA	1	2	0.471372	low
TCGA_UY_A8OC	Meta-testing cohort 2_566	0.252055	1	2	1	4	2	1.99127	high
U0125	Meta-testing cohort 2_567	1.61096	0	2	1	0	1	0.818599	low
GSM806844	Meta-testing cohort 2_568	3.53753	0	1	1	1	2	1.20331	high
GSM786532	Meta-testing cohort 2_569	0.272735	1	2	2	3	2	1.41333	high
GSM814072	Meta-testing cohort 2_57	0.0891725	0	2	2	1	2	2.27756	high
GSM806870	Meta-testing cohort 2_570	2.95644	0	2	1	0	1	0.288772	low
GSM1167461	Meta-testing cohort 2_571	0.123288	0	2	NA	4	NA	1.25118	high
U0641	Meta-testing cohort 2_572	3.14795	0	2	1	0	1	0.596732	low
GSM340710.y	Meta-testing cohort 2_573	2.59151	1	2	1	1	2	0.773496	low
U0606	Meta-testing cohort 2_574	3.32055	0	2	1	1	2	0.658418	low
U1189	Meta-testing cohort 2_575	3.13151	0	2	1	1	1	0.34489	low
GSM3689003	Meta-testing cohort 2_576	0.000273973	0	NA	1	1	2	0.49328	low
BLCA_Nac_28	Meta-testing cohort 2_577	8.13699	0	2	1	3	2	0.881393	low
GSM340673	Meta-testing cohort 2_578	0.923288	1	1	2	2	1	1.2693	high
GSM3689121	Meta-testing cohort 2_579	4.04384	1	NA	1	2	2	2.10826	high
BLCA_Nac_103	Meta-testing cohort 2_58	0.493151	1	2	1	3	2	0.964045	low
GSM786521	Meta-testing cohort 2_580	1.03963	1	1	1	3	2	1.62011	high
GSM340645.x	Meta-testing cohort 2_581	2.93425	1	2	1	1	2	1.54425	high
GSM4974727	Meta-testing cohort 2_582	4.93151	0	NA	NA	1	2	1.97952	high
GSM340713.x	Meta-testing cohort 2_583	3.37534	0	1	1	1	1	1.97416	high
SAM025b45c27e05	Meta-testing cohort 2_584	0.720992	1	1	1	3	NA	1.97416	high
U0093	Meta-testing cohort 2_585	0.427397	1	1	1	1	2	0.818599	low
GSM4974818	Meta-testing cohort 2_586	3.20548	0	NA	NA	0	1	0.273208	low
GSM2301894	Meta-testing cohort 2_587	0.37726	1	2	2	4	2	0.571183	low
GSM71034	Meta-testing cohort 2_588	4.93151	0	NA	NA	0	2	1.26591	high
SAM675a12a09c15	Meta-testing cohort 2_589	0.23763	1	1	1	1	NA	1.4483	high
GSM119733	Meta-testing cohort 2_59	3.45205	0	NA	NA	3	NA	1.11582	high
GSM3689184	Meta-testing cohort 2_590	2.23562	1	NA	1	1	2	0.961779	low
U1363	Meta-testing cohort 2_591	1.94795	0	2	1	0	1	0.182535	low
TCGA_UY_A78P	Meta-testing cohort 2_592	6.52055	0	2	2	2	2	0.608484	low
GSM3689020	Meta-testing cohort 2_593	1.93151	0	NA	1	0	2	0.407508	low
FR_80_U133_2.CEL	Meta-testing cohort 2_594	0.410959	1	2	1	3	2	2.01598	high
TCGA_ZF_AA5P	Meta-testing cohort 2_595	1.01918	0	2	1	4	2	1.62018	high
GSM4974696	Meta-testing cohort 2_596	1.9726	0	NA	NA	0	2	0.877173	low
U0450	Meta-testing cohort 2_597	1.29863	0	2	1	0	1	0.420261	low
U0140	Meta-testing cohort 2_598	3.32877	0	2	1	0	1	0.420261	low
GSM814304	Meta-testing cohort 2_599	2.16176	0	2	1	0	1	1.31926	high
GSM3689186	Meta-testing cohort 2_6	0.263014	0	NA	1	0	1	0.810178	low
GSM2301837	Meta-testing cohort 2_60	4.14493	1	1	1	1	2	1.23865	high
U1188	Meta-testing cohort 2_600	0.353425	0	2	1	1	2	1.27688	high
U0612	Meta-testing cohort 2_601	3.78904	0	1	2	0	1	0.663372	low
GSM340698.x	Meta-testing cohort 2_602	2.34521	1	2	1	1	2	1.54668	high
GSM4974817	Meta-testing cohort 2_603	4.93151	0	NA	NA	0	2	0.445212	low
GSM806877	Meta-testing cohort 2_604	6.67479	0	2	1	1	1	1.38995	high
GSM814276	Meta-testing cohort 2_605	3.33451	0	1	1	0	1	0.652701	low
GSM1173975	Meta-testing cohort 2_606	3.57534	1	1	2	0	NA	1.76537	high
GSM814292	Meta-testing cohort 2_607	2.74273	0	2	2	1	2	1.33274	high
GSM814333	Meta-testing cohort 2_608	1.45378	0	2	1	0	1	1.53806	high
GSM814110	Meta-testing cohort 2_609	4.46673	0	2	1	2	2	1.81134	high
GSM806920	Meta-testing cohort 2_61	0.302466	1	1	1	2	2	2.72175	high
GSM4974663	Meta-testing cohort 2_610	4.27397	0	NA	NA	0	1	1.13653	high
GSM71029	Meta-testing cohort 2_611	0.90411	0	NA	NA	0	1	0.331566	low
GSM4974706	Meta-testing cohort 2_612	4.93151	0	NA	NA	0	1	0.685401	low
U1295	Meta-testing cohort 2_613	1.93973	0	1	1	0	2	0.466272	low
GSM2301781	Meta-testing cohort 2_614	0.0353425	0	2	1	0	1	1.73016	high
BLCA_Nac_144	Meta-testing cohort 2_615	0.90411	1	1	1	3	2	0.505986	low
GSM2301821	Meta-testing cohort 2_616	13.9997	1	2	1	1	1	0.997493	low
GSM2301836	Meta-testing cohort 2_617	8.19452	0	2	1	4	1	0.985266	low
GSM806817	Meta-testing cohort 2_618	1.62411	0	2	1	1	1	0.572852	low
GSM3699752	Meta-testing cohort 2_619	13.0685	1	2	1	0	2	1.82765	high
U0147	Meta-testing cohort 2_62	3.47671	0	1	1	1	2	1.54256	high
UCC_EU2015_13	Meta-testing cohort 2_620	4.99068	1	2	2	2	NA	0.345698	low
U0408	Meta-testing cohort 2_621	0.509589	1	2	2	0	2	0.621131	low
TCGA_DK_AA76	Meta-testing cohort 2_622	1.00274	0	1	2	2	2	1.62893	high
GSM814149	Meta-testing cohort 2_623	0.829574	0	2	1	0	2	1.97952	high
TCGA_C4_A0F0	Meta-testing cohort 2_624	0.161644	0	1	1	2	2	1.23584	high
GSM71044	Meta-testing cohort 2_625	4.93151	0	NA	NA	0	2	0.404485	low
GSM806859	Meta-testing cohort 2_626	6.80959	0	2	1	0	1	0.932446	low
GSM3699776	Meta-testing cohort 2_627	4.93151	1	1	1	0	1	0.500761	low
GSM4974742	Meta-testing cohort 2_628	4.93151	0	NA	NA	0	2	0.928711	low
GSM3689055	Meta-testing cohort 2_629	1.83288	1	NA	1	2	2	0.64252	low
GSM340650.y	Meta-testing cohort 2_63	7.98904	0	1	1	1	1	0.569779	low
TCGA_DK_A3IS	Meta-testing cohort 2_630	4.18904	0	2	1	2	2	0.928711	low
GSM786512	Meta-testing cohort 2_631	1.09364	1	2	1	3	2	1.54256	high
GSM340607	Meta-testing cohort 2_632	11.2082	0	1	1	0	1	1.6932	high
GSM119491	Meta-testing cohort 2_633	2.9589	0	NA	NA	3	NA	1.10214	high
GSM806823	Meta-testing cohort 2_634	2.65356	1	2	1	0	1	0.90969	low
TCGA_XF_A8HB	Meta-testing cohort 2_635	3.75342	0	1	2	2	2	1.13167	high
GSM340712	Meta-testing cohort 2_636	0.534247	1	2	1	3	2	1.97944	high
UCC40_primary	Meta-testing cohort 2_637	3.67562	0	2	2	1	NA	0.432963	low
GSM1167387	Meta-testing cohort 2_638	0.484932	0	2	NA	3	NA	2.35377	high
GSM806819	Meta-testing cohort 2_639	2.36137	0	2	1	0	1	0.663372	low
GSM814189	Meta-testing cohort 2_64	4.73154	0	1	2	2	2	0.754533	low
GSM814353	Meta-testing cohort 2_640	0.899831	1	2	2	2	2	1.44424	high
TCGA_S5_AA26	Meta-testing cohort 2_641	1.37808	0	1	1	3	2	2.9203	high
GSM4974687	Meta-testing cohort 2_642	2.05479	0	NA	NA	0	1	1.71431	high
TCGA_DK_A6AW	Meta-testing cohort 2_643	4.4411	0	2	1	2	2	0.635569	low
GSM340737.x	Meta-testing cohort 2_644	2.44384	0	1	1	1	1	1.03859	high
TCGA_FJ_A3ZF	Meta-testing cohort 2_645	1.43562	0	2	1	3	2	0.700006	low
GSM1167457	Meta-testing cohort 2_646	3.66575	1	1	NA	4	NA	0.521441	low
GSM2301870	Meta-testing cohort 2_647	2.08849	1	1	1	2	2	2.10826	high
U1023	Meta-testing cohort 2_648	0.854795	0	1	1	0	1	1.79215	high
GSM1816538	Meta-testing cohort 2_649	17.8274	0	NA	NA	NA	NA	0.34489	low
GSM2301857	Meta-testing cohort 2_65	9.56959	1	2	1	0	1	0.362834	low
U0041	Meta-testing cohort 2_650	3.34521	0	2	1	0	2	0.611684	low
U0438	Meta-testing cohort 2_651	4.38904	0	2	1	0	1	1.99283	high
FR_30_U133_2.CEL	Meta-testing cohort 2_652	0.90411	1	2	1	3	2	0.34489	low
GSM340722.x	Meta-testing cohort 2_653	1.93425	1	2	2	1	1	2.39857	high
GSM2301866	Meta-testing cohort 2_654	8.68274	0	1	2	0	1	0.579832	low
GSM340696	Meta-testing cohort 2_655	0.945205	1	2	1	3	2	1.20874	high
U1286	Meta-testing cohort 2_656	2.25205	0	2	1	0	2	0.813398	low
FR_181_U133_2.CEL	Meta-testing cohort 2_657	1.64384	0	1	1	2	2	2.73162	high
GSM1709080	Meta-testing cohort 2_658	2.53808	0	1	NA	3	NA	2.69814	high
JMT1_7	Meta-testing cohort 2_659	3.14795	0	NA	NA	1	2	0.835186	low
GSM3689070	Meta-testing cohort 2_66	0.854795	0	NA	1	0	2	0.58991	low
GSM3689153	Meta-testing cohort 2_660	7.38082	0	NA	1	1	2	1.10729	high
TCGA_E5_A4U1	Meta-testing cohort 2_661	3.23562	0	2	1	2	2	2.15117	high
SAM54e58f1b0230	Meta-testing cohort 2_662	0.359146	1	1	1	1	NA	2.39857	high
TCGA_XF_A8HG	Meta-testing cohort 2_663	1.27945	1	2	1	3	2	1.23535	high
UCC_EU2015_43	Meta-testing cohort 2_664	0.0353425	1	1	1	3	NA	0.171886	low
U0457	Meta-testing cohort 2_665	5.21096	0	2	1	0	2	0.185991	low
GSM814289	Meta-testing cohort 2_666	0.675549	1	1	2	2	2	1.10214	high
GSM3699781	Meta-testing cohort 2_667	5.09589	1	2	1	0	1	3.49592	high
GSM814348	Meta-testing cohort 2_668	0.753913	0	2	1	0	1	0.925702	low
GSM3689132	Meta-testing cohort 2_669	1.03562	1	NA	1	2	2	1.46885	high
GSM340727	Meta-testing cohort 2_67	0.909589	1	2	1	3	1	1.55333	high
GSM786520	Meta-testing cohort 2_670	0.764198	1	1	2	3	2	2.86895	high
U0455	Meta-testing cohort 2_671	5.04658	0	2	1	1	2	0.588866	low
GSM814347	Meta-testing cohort 2_672	0.818765	0	1	1	2	2	0.137941	low
GSM814272	Meta-testing cohort 2_673	2.14825	0	2	1	1	1	0.34489	low
BL030	Meta-testing cohort 2_674	3.00822	0	NA	NA	NA	NA	0.441389	low
GSM119494	Meta-testing cohort 2_675	6.82192	0	NA	NA	3	NA	2.19532	high
GSM1167419	Meta-testing cohort 2_676	5.46575	1	1	NA	2	NA	3.31888	high
GSM1167381	Meta-testing cohort 2_677	0.657534	0	2	NA	2	NA	0.861189	low
SAM30b5c6c54cf7	Meta-testing cohort 2_678	0.761498	1	1	2	4	NA	0.985266	low
GSM340710.x	Meta-testing cohort 2_679	2.59178	1	2	1	1	2	3.97314	high
U1307	Meta-testing cohort 2_68	1.78356	0	2	1	0	1	0.466272	low
U1243	Meta-testing cohort 2_680	2.49041	0	1	1	0	1	0.14836	low
GSM786549	Meta-testing cohort 2_681	9.15958	0	1	1	3	2	3.11784	high
TCGA_XF_AAMJ	Meta-testing cohort 2_682	4.57534	1	2	1	3	2	5.45352	high
GSM786522	Meta-testing cohort 2_683	5.96236	0	1	1	3	2	1.83552	high
GSM3689149	Meta-testing cohort 2_684	4.9726	1	NA	1	2	2	0.242615	low
GSM3689134	Meta-testing cohort 2_685	0.172603	0	NA	2	0	1	2.69814	high
JMT1_59	Meta-testing cohort 2_686	6.36164	1	NA	NA	1	2	1.83591	high
GSM2454225	Meta-testing cohort 2_687	11.0959	0	2	1	0	2	0.813398	low
U0264	Meta-testing cohort 2_688	5.83562	0	1	2	0	1	0.769863	low
U1192	Meta-testing cohort 2_689	0.690411	0	1	1	1	2	1.12272	high
SAMd215b503f99a	Meta-testing cohort 2_69	0.140418	0	1	1	1	NA	5.12884	high
TCGA_ZF_A9R3	Meta-testing cohort 2_690	2.6	1	1	2	2	2	1.96841	high
BLCA_Nac_10	Meta-testing cohort 2_691	4.27397	1	1	1	3	2	1.16695	high
U1271	Meta-testing cohort 2_692	1.99726	0	2	1	0	1	0.461476	low
JMT1_30	Meta-testing cohort 2_693	4.52055	0	NA	NA	1	2	0.629031	low
SAMb419a8fcbfcd	Meta-testing cohort 2_694	1.86864	0	1	1	4	NA	0.335402	low
TCGA_E5_A2PC	Meta-testing cohort 2_695	3.63288	0	1	2	4	2	1.00053	low
U1354	Meta-testing cohort 2_696	1.92329	0	2	1	1	2	0.318193	low
GSM3689087	Meta-testing cohort 2_697	0.000273973	0	NA	1	0	2	1.13167	high
SAM18bc1078bc15	Meta-testing cohort 2_698	0.567073	1	1	1	2	NA	0.2478	low
GSM340668	Meta-testing cohort 2_699	6.17534	0	1	1	0	1	0.907992	low
GSM340658	Meta-testing cohort 2_7	6.87397	0	2	1	1	1	1.14984	high
FR_67_U133_2.CEL	Meta-testing cohort 2_70	1.56164	1	1	1	3	2	1.13167	high
GSM786498	Meta-testing cohort 2_700	14.2524	0	2	1	3	2	2.00217	high
GSM3689124	Meta-testing cohort 2_701	2.52329	0	NA	1	0	1	1.50286	high
GSM71030	Meta-testing cohort 2_702	0.739726	0	NA	NA	0	2	1.03859	high
TCGA_GU_A42Q	Meta-testing cohort 2_703	0.942466	1	2	1	3	2	1.97416	high
GSM806864	Meta-testing cohort 2_704	0.738082	1	2	1	2	2	2.56237	high
U0267	Meta-testing cohort 2_705	0.345205	1	2	1	0	1	0.484627	low
TCGA_DK_AA77	Meta-testing cohort 2_706	1.69315	0	1	1	2	2	1.10729	high
BLCA_Nac_93	Meta-testing cohort 2_707	5.0137	0	2	1	2	2	0.915454	low
GSM3689133	Meta-testing cohort 2_708	0.000273973	0	NA	2	1	2	0.685401	low
SAM52500cabdd36	Meta-testing cohort 2_709	1.68232	0	1	2	2	NA	2.56471	high
FR_65_U133_2.CEL	Meta-testing cohort 2_71	1.06849	0	2	1	2	2	1.97763	high
GSM3689148	Meta-testing cohort 2_710	2.06301	0	NA	1	0	1	1.54256	high
GSM2301817	Meta-testing cohort 2_711	10.2756	0	2	1	3	2	1.2693	high
BLCA_Nac_110	Meta-testing cohort 2_712	1.89041	1	2	1	2	1	1.2693	high
U1292	Meta-testing cohort 2_713	1.88219	0	2	1	1	2	1.97944	high
GSM2301794	Meta-testing cohort 2_714	10.3184	1	1	1	1	1	2.69814	high
TCGA_CU_A0YN	Meta-testing cohort 2_715	1.07671	1	1	1	3	2	0.861189	low
U1266	Meta-testing cohort 2_716	2.33425	0	2	1	0	1	0.324357	low
GSM119498	Meta-testing cohort 2_717	2.9589	0	NA	NA	3	NA	1.2693	high
GSM3689169	Meta-testing cohort 2_718	0.131507	0	NA	2	1	1	0.793789	low
GSM814056	Meta-testing cohort 2_719	2.98849	1	1	1	3	2	1.10509	high
U1043	Meta-testing cohort 2_72	2.36712	0	1	2	1	2	0.142249	low
GSM340657.x	Meta-testing cohort 2_720	6.87397	0	2	1	1	1	0.943628	low
GSM786568	Meta-testing cohort 2_721	6.96419	0	2	1	3	2	2.35377	high
GSM4974640	Meta-testing cohort 2_722	4.93151	0	NA	NA	1	2	2.70289	high
U1171	Meta-testing cohort 2_723	0.263014	1	2	2	1	2	1.05258	high
BLCA_Nac_41	Meta-testing cohort 2_724	1.15068	1	2	1	3	NA	1.04759	high
TCGA_BL_A13J	Meta-testing cohort 2_725	0.221918	1	2	1	4	2	0.861189	low
JMT1_25	Meta-testing cohort 2_726	0.731507	1	NA	NA	1	2	0.704486	low
SAMa1e62d323e1d	Meta-testing cohort 2_727	0.869511	1	1	2	2	NA	0.422773	low
TCGA_FJ_A3ZE	Meta-testing cohort 2_728	0.887671	1	2	1	4	2	0.335402	low
GSM1167399	Meta-testing cohort 2_729	14.7288	1	1	NA	2	NA	2.85833	high
GSM806849	Meta-testing cohort 2_73	4.46712	0	2	1	2	2	1.33274	high
GSM806923	Meta-testing cohort 2_730	0.532603	1	2	1	2	2	1.24115	high
TCGA_FD_A6TB	Meta-testing cohort 2_731	1.56712	0	2	1	3	2	1.47548	high
GSM3699764	Meta-testing cohort 2_732	7.15068	0	1	1	0	1	1.53806	high
SAMbd8ee73983b8	Meta-testing cohort 2_733	0.070209	1	1	1	2	NA	2.90704	high
JMT1_2	Meta-testing cohort 2_734	4.47123	0	NA	NA	1	2	0.0969901	low
TCGA_FD_A3SN	Meta-testing cohort 2_735	2.43014	0	2	1	3	2	1.72068	high
U0007	Meta-testing cohort 2_736	3.5589	0	2	1	0	1	1.04633	high
GSM340642.x	Meta-testing cohort 2_737	8.71507	0	2	1	1	1	1.73712	high
GSM3689103	Meta-testing cohort 2_738	8.20274	0	NA	1	1	2	1.7268	high
SAM8f2275c36e8c	Meta-testing cohort 2_739	1.70392	0	1	1	1	NA	1.53806	high
UCC_EU2015_25	Meta-testing cohort 2_74	11.7896	0	2	1	0	NA	0.257145	low
GSM4974757	Meta-testing cohort 2_740	3.12329	0	NA	NA	1	2	3.49606	high
GSM786561	Meta-testing cohort 2_741	1.23946	1	2	1	3	2	2.69375	high
TCGA_K4_A3WU	Meta-testing cohort 2_742	0.287671	0	2	1	3	2	1.51588	high
SAM7f0d9cc7f001	Meta-testing cohort 2_743	0.380749	1	1	1	2	NA	0.957574	low
GSM1173936	Meta-testing cohort 2_744	3.86301	0	2	1	3	NA	2.41278	high
U0550	Meta-testing cohort 2_745	3.54247	0	2	1	0	2	0.772206	low
SAMabc151b01ea3	Meta-testing cohort 2_746	0.0459059	1	1	2	4	NA	2.57251	high
SAMe9475f77504b	Meta-testing cohort 2_747	1.5338	0	1	1	4	NA	0.709582	low
UCC_EU2015_30	Meta-testing cohort 2_748	9.8063	0	2	1	1	NA	0.156614	low
GSM4974761	Meta-testing cohort 2_749	3.28767	0	NA	NA	1	2	0.169893	low
GSM1816539	Meta-testing cohort 2_75	10.4712	0	NA	NA	NA	NA	0.601651	low
GSM814285	Meta-testing cohort 2_750	2.7022	0	1	1	1	1	0.447872	low
U0161	Meta-testing cohort 2_751	3.36986	0	2	1	0	1	1.63415	high
GSM1173928	Meta-testing cohort 2_752	2.3589	0	2	1	3	NA	2.56471	high
TCGA_FD_A3SJ	Meta-testing cohort 2_753	2.02466	1	1	1	4	2	2.67508	high
BLCA_Nac_97	Meta-testing cohort 2_754	6.90411	1	2	1	3	2	0.863888	low
GSM3689009	Meta-testing cohort 2_755	0.550685	1	NA	2	2	2	0.861189	low
GSM814248	Meta-testing cohort 2_756	3.37504	0	1	2	2	2	1.18856	high
U1264	Meta-testing cohort 2_757	2.45753	0	2	1	1	2	1.89854	high
GSM1167342	Meta-testing cohort 2_758	1.67671	0	2	NA	3	NA	3.58837	high
U0038	Meta-testing cohort 2_759	3.41096	0	1	1	1	2	0.253721	low
GSM2301778	Meta-testing cohort 2_76	1.90274	1	1	1	1	2	1.26591	high
JMT1_42	Meta-testing cohort 2_760	3.12329	0	NA	NA	1	2	0.114504	low
GSM340689.x	Meta-testing cohort 2_761	4.80274	0	2	2	1	1	0.108756	low
GSM3689061	Meta-testing cohort 2_762	2.05479	0	NA	1	1	1	0.863406	low
GSM786542	Meta-testing cohort 2_763	0.364547	1	2	2	3	2	1.54256	high
FR_1_U133_2.CEL	Meta-testing cohort 2_764	0.0821918	1	2	1	3	2	1.50934	high
GSM3689035	Meta-testing cohort 2_765	0.723288	1	NA	2	2	2	0.778734	low
GSM814103	Meta-testing cohort 2_766	3.65877	0	2	1	1	1	0.625294	low
GSM3689146	Meta-testing cohort 2_767	0.000273973	0	NA	1	0	1	1.54256	high
GSM786513	Meta-testing cohort 2_768	0.0891114	1	2	1	3	2	1.26591	high
GSM2301890	Meta-testing cohort 2_769	0.139726	1	2	1	4	2	0.818599	low
TCGA_BL_A13I	Meta-testing cohort 2_77	0.610959	1	1	2	3	2	1.07845	high
U0143	Meta-testing cohort 2_770	1.2411	0	1	1	0	2	0.307091	low
UCC_EU2015_36	Meta-testing cohort 2_771	1.40959	1	2	1	3	NA	0.182736	low
GSM1173955	Meta-testing cohort 2_772	3.59178	1	1	1	1	NA	2.73162	high
GSM2301825	Meta-testing cohort 2_773	1.01342	1	2	2	0	1	1.95172	high
SAMe3d4266775a9	Meta-testing cohort 2_774	1.15035	0	1	1	1	NA	1.75021	high
TCGA_ZF_AA53	Meta-testing cohort 2_775	4.82466	0	1	1	2	2	2.22056	high
U0348	Meta-testing cohort 2_776	3.91233	0	2	1	0	1	0.629031	low
TCGA_BT_A3PK	Meta-testing cohort 2_777	0.830137	1	2	1	2	2	4.24748	high
GSM340691.x	Meta-testing cohort 2_778	4.73699	0	1	2	1	1	0.648751	low
GSM340627.x	Meta-testing cohort 2_779	1.86301	1	2	2	1	1	0.679805	low
GSM1816510	Meta-testing cohort 2_78	1.03562	0	NA	NA	NA	NA	1.2693	high
GSM340744.x	Meta-testing cohort 2_780	1.14521	1	2	1	1	2	0.363804	low
GSM806914	Meta-testing cohort 2_781	5.24795	0	2	2	1	2	1.98383	high
GSM4974789	Meta-testing cohort 2_782	4.93151	0	NA	NA	0	1	0.776658	low
U0154	Meta-testing cohort 2_783	3.52603	0	2	1	0	1	0.255001	low
GSM4974836	Meta-testing cohort 2_784	2.38356	0	NA	NA	0	1	0.625294	low
TCGA_XF_A9SX	Meta-testing cohort 2_79	1.96986	1	1	2	4	2	0.893631	low
GSM1816548	Meta-testing cohort 2_8	3.86301	0	NA	NA	NA	NA	1.50934	high
GSM119713	Meta-testing cohort 2_80	29.3425	0	NA	NA	3	NA	3.67181	high
GSM814204	Meta-testing cohort 2_81	1.98882	1	2	1	3	2	1.14366	high
GSM4974792	Meta-testing cohort 2_82	4.93151	0	NA	NA	0	2	0.619648	low
GSM4974821	Meta-testing cohort 2_83	4.93151	0	NA	NA	1	2	1.97944	high
GSM2301815	Meta-testing cohort 2_84	1.50904	1	2	1	4	2	1.62444	high
GSM4974729	Meta-testing cohort 2_85	4.93151	0	NA	NA	1	2	1.97416	high
GSM340631	Meta-testing cohort 2_86	9.87671	0	1	1	0	1	0.614939	low
GSM340626	Meta-testing cohort 2_87	9.91233	0	1	1	1	1	0.3155	low
GSM2301880	Meta-testing cohort 2_88	4.98575	1	1	1	3	2	0.822293	low
UCC42_primary	Meta-testing cohort 2_89	2.6326	0	2	1	0	NA	0.659512	low
GSM3688998	Meta-testing cohort 2_9	0.550685	0	NA	2	1	2	1.49084	high
GSM3689069	Meta-testing cohort 2_90	0.000273973	0	NA	1	0	1	0.815569	low
GSM340645.y	Meta-testing cohort 2_91	2.93425	1	2	1	1	2	0.463912	low
GSM4974698	Meta-testing cohort 2_92	3.69863	0	NA	NA	1	2	0.509759	low
GSM806873	Meta-testing cohort 2_93	4.1589	0	2	1	1	2	0.518343	low
JMT1_56	Meta-testing cohort 2_94	1.63562	0	NA	NA	1	2	3.13469	high
SAMd43f8933066b	Meta-testing cohort 2_95	1.64451	0	1	1	2	NA	0.659512	low
GSM1167455	Meta-testing cohort 2_96	11.5644	1	1	NA	2	NA	0.782934	low
GSM2301893	Meta-testing cohort 2_97	3.70521	0	2	2	3	2	3.76267	high
FR_139_U133_2.CEL	Meta-testing cohort 2_98	0.821918	1	2	1	2	2	1.54668	high
SAM110501d0eedb	Meta-testing cohort 2_99	0.351045	1	1	1	2	NA	1.09831	high
U1084	Meta-testing cohort 3_1	3.44384	0	2	1	1	1	0.0695527	low
U1408	Meta-testing cohort 3_10	1.19178	0	1	2	0	1	0.109405	low
U0394	Meta-testing cohort 3_100	5.30137	0	1	1	0	1	0.351856	low
GSM4974717	Meta-testing cohort 3_101	0.410959	0	NA	NA	1	2	0.352133	low
BLCA_Cx_200	Meta-testing cohort 3_102	7.15068	0	2	1	2	1	0.352263	low
GSM806882	Meta-testing cohort 3_103	3.25315	0	2	1	0	1	0.369568	low
GSM814150	Meta-testing cohort 3_104	3.25344	0	2	1	0	1	0.369568	low
GSM4974760	Meta-testing cohort 3_105	4.93151	0	NA	NA	0	1	0.369568	low
SAM34430ef08e5b	Meta-testing cohort 3_106	1.49329	0	1	1	4	NA	0.371347	low
GSM71053	Meta-testing cohort 3_107	4.93151	0	NA	NA	1	2	0.37296	low
U1374	Meta-testing cohort 3_108	2.16164	0	2	1	1	2	0.373957	low
GSM4974793	Meta-testing cohort 3_109	4.93151	0	NA	NA	1	2	0.376192	low
TCGA_DK_AA75	Meta-testing cohort 3_11	0.931507	1	2	1	3	2	0.112305	low
U1026	Meta-testing cohort 3_110	1.38082	0	1	1	0	1	0.380634	low
U0023	Meta-testing cohort 3_111	2.94247	0	2	1	0	2	0.391282	low
TCGA_UY_A9PA	Meta-testing cohort 3_112	0.326027	0	1	1	3	2	0.392509	low
GSM3689058	Meta-testing cohort 3_113	7.07671	1	NA	1	2	2	0.394995	low
TCGA_FD_A3SS	Meta-testing cohort 3_114	1.07123	1	2	1	4	2	0.396113	low
JMT1_40	Meta-testing cohort 3_115	2.06301	0	NA	NA	1	2	0.397686	low
GSM71049	Meta-testing cohort 3_116	4.93151	0	NA	NA	0	1	0.405318	low
UCC51_primary	Meta-testing cohort 3_117	4.23616	1	1	1	3	NA	0.407508	low
U1103	Meta-testing cohort 3_118	2.09589	0	2	2	0	1	0.407508	low
U1113	Meta-testing cohort 3_119	1.79178	0	2	1	0	2	0.409504	low
UCC_EU2015_14	Meta-testing cohort 3_12	3.8589	1	1	1	3	NA	0.112305	low
GSM340606	Meta-testing cohort 3_120	11.2575	0	1	2	0	1	0.411161	low
GSM814163	Meta-testing cohort 3_121	4.57752	0	2	1	1	2	0.41511	low
GSM4974683	Meta-testing cohort 3_122	4.93151	0	NA	NA	1	2	0.41511	low
FR_91_U133_2.CEL	Meta-testing cohort 3_123	0.739726	0	2	1	2	2	0.41511	low
SAM753d4bb52dbe	Meta-testing cohort 3_124	0.93432	1	1	1	1	NA	0.41511	low
GSM814331	Meta-testing cohort 3_125	1.45378	0	2	2	0	1	0.420261	low
GSM3699761	Meta-testing cohort 3_126	8.54795	0	2	1	0	1	0.420261	low
GSM806906	Meta-testing cohort 3_127	5.4179	0	1	2	1	2	0.421485	low
GSM1167453	Meta-testing cohort 3_128	1.53699	0	2	NA	4	NA	0.422523	low
GSM1167384	Meta-testing cohort 3_129	0.969863	0	2	NA	3	NA	0.422773	low
TCGA_GU_A763	Meta-testing cohort 3_13	2.73151	0	2	1	3	2	0.114504	low
TCGA_CF_A7I0	Meta-testing cohort 3_130	1.00822	0	1	1	2	1	0.425229	low
U0268	Meta-testing cohort 3_131	5.67123	0	2	1	0	2	0.425382	low
GSM3699773	Meta-testing cohort 3_132	3.36986	0	2	1	0	1	0.439887	low
GSM1709075	Meta-testing cohort 3_133	4.15315	1	2	NA	0	NA	0.441389	low
TCGA_4Z_AA7W	Meta-testing cohort 3_134	2.30137	0	1	1	2	2	0.44222	low
GSM3699783	Meta-testing cohort 3_135	4.84932	1	2	1	0	2	0.445212	low
U1136	Meta-testing cohort 3_136	1.84932	0	2	2	1	1	0.445212	low
GSM786518	Meta-testing cohort 3_137	4.79311	1	2	1	3	2	0.445212	low
GSM340643.x	Meta-testing cohort 3_138	7.83288	0	2	1	1	1	0.449935	low
TCGA_CF_A3MI	Meta-testing cohort 3_139	1.0137	0	1	1	2	1	0.455013	low
GSM4974797	Meta-testing cohort 3_14	3.28767	0	NA	NA	0	1	0.115107	low
U1300	Meta-testing cohort 3_140	2.2274	0	2	1	0	2	0.45589	low
U1148	Meta-testing cohort 3_141	2.25205	0	2	1	0	1	0.461476	low
GSM806842	Meta-testing cohort 3_142	3.65918	0	2	1	1	1	0.461476	low
GSM340663.y	Meta-testing cohort 3_143	7.38904	0	2	1	1	2	0.463912	low
GSM340717.y	Meta-testing cohort 3_144	3.9863	0	1	1	1	1	0.463912	low
U1228	Meta-testing cohort 3_145	2.93425	0	2	1	0	1	0.466272	low
BL065	Meta-testing cohort 3_146	0.558904	1	NA	NA	NA	NA	0.470115	low
BLCA_Nac_34	Meta-testing cohort 3_147	5.34247	0	1	1	3	2	0.471372	low
U0152	Meta-testing cohort 3_148	0.123288	0	1	2	3	2	0.471372	low
SAM18b9351e265a	Meta-testing cohort 3_149	1.30427	1	1	1	3	NA	0.471372	low
TCGA_GV_A6ZA	Meta-testing cohort 3_15	1.89315	0	1	1	2	2	0.115107	low
U0397	Meta-testing cohort 3_150	5.0137	0	2	1	1	1	0.474695	low
SAMf275eb859a39	Meta-testing cohort 3_151	2.01176	0	1	1	1	NA	0.477068	low
p1404_64.CEL	Meta-testing cohort 3_152	1.98882	1	NA	NA	2	2	0.477907	low
JMT1_28	Meta-testing cohort 3_153	3.70685	0	NA	NA	1	2	0.478243	low
GSM4974660	Meta-testing cohort 3_154	4.68493	0	NA	NA	0	2	0.478243	low
TCGA_4Z_AA7Q	Meta-testing cohort 3_155	1.39726	1	2	1	3	2	0.479127	low
U0100	Meta-testing cohort 3_156	2.35068	0	2	1	0	1	0.482988	low
GSM3689136	Meta-testing cohort 3_157	1.87397	1	NA	1	2	2	0.483837	low
GSM340662.y	Meta-testing cohort 3_158	6.47918	0	2	1	1	2	0.491738	low
BLCA_Nac_33	Meta-testing cohort 3_159	1.39726	1	2	1	2	2	0.500761	low
U0380	Meta-testing cohort 3_16	5.40822	0	2	1	0	2	0.116331	low
U0182	Meta-testing cohort 3_160	3.14795	0	2	1	0	1	0.506918	low
GSM340740.x	Meta-testing cohort 3_161	1.45205	1	2	1	1	1	0.506975	low
U0975	Meta-testing cohort 3_162	1.39726	0	2	2	1	1	0.507151	low
GSM340739	Meta-testing cohort 3_163	2.4137	0	2	1	1	1	0.507552	low
BL117	Meta-testing cohort 3_164	0.624658	1	NA	NA	NA	NA	0.507866	low
U0018	Meta-testing cohort 3_165	2.90959	0	2	1	0	2	0.511368	low
U0998	Meta-testing cohort 3_166	4.30685	0	1	1	0	1	0.513662	low
U0913	Meta-testing cohort 3_167	4.71781	0	2	1	0	1	0.514816	low
U0856	Meta-testing cohort 3_168	2.97534	0	2	1	0	2	0.518643	low
GSM1816516	Meta-testing cohort 3_169	5.43288	0	NA	NA	NA	NA	0.534289	low
GSM4974796	Meta-testing cohort 3_17	3.28767	0	NA	NA	0	1	0.117822	low
GSM2301829	Meta-testing cohort 3_170	5.28493	1	2	1	0	1	0.534289	low
U1311	Meta-testing cohort 3_171	2.28493	0	2	1	0	1	0.534777	low
GSM2301796	Meta-testing cohort 3_172	0.183288	0	2	1	1	2	0.534777	low
SAM91c47b054ffb	Meta-testing cohort 3_173	1.39878	1	1	1	2	NA	0.537848	low
BL093	Meta-testing cohort 3_174	2.65479	0	NA	NA	NA	NA	0.542507	low
GSM3689140	Meta-testing cohort 3_175	0.000273973	0	NA	1	1	2	0.544401	low
GSM3699777	Meta-testing cohort 3_176	4.93151	0	2	1	0	1	0.544401	low
TCGA_E7_A541	Meta-testing cohort 3_177	2.13151	1	2	1	2	2	0.545268	low
TCGA_DK_A1A7	Meta-testing cohort 3_178	1.53425	0	2	2	4	2	0.549862	low
GSM1816544	Meta-testing cohort 3_179	17.8356	1	NA	NA	NA	NA	0.551157	low
U1356	Meta-testing cohort 3_18	1.27397	0	2	1	0	2	0.130286	low
GSM1173922	Meta-testing cohort 3_180	5.86849	1	2	1	3	NA	0.551157	low
GSM806925	Meta-testing cohort 3_181	4.41534	0	1	1	2	2	0.551157	low
GSM814271	Meta-testing cohort 3_182	3.35613	0	2	1	0	1	0.565831	low
TCGA_E7_A519	Meta-testing cohort 3_183	1.39178	0	2	1	2	2	0.56595	low
GSM71042	Meta-testing cohort 3_184	4.93151	0	NA	NA	0	1	0.568169	low
U1033	Meta-testing cohort 3_185	4.57808	0	2	2	0	1	0.569779	low
GSM340650.x	Meta-testing cohort 3_186	7.07397	0	1	1	1	1	0.569779	low
TCGA_K4_A5RJ	Meta-testing cohort 3_187	1.47671	0	2	1	2	2	0.571183	low
SAMc919aebc7fdd	Meta-testing cohort 3_188	1.70392	0	1	1	4	NA	0.572852	low
GSM340711.y	Meta-testing cohort 3_189	3.43562	0	1	2	1	1	0.574307	low
U0261	Meta-testing cohort 3_19	5.11233	0	1	1	0	1	0.131784	low
SAM9b9d48b0b02c	Meta-testing cohort 3_190	0.23763	1	1	1	2	NA	0.579832	low
GSM4974839	Meta-testing cohort 3_191	3.69863	0	NA	NA	1	2	0.579832	low
TCGA_E7_A4XJ	Meta-testing cohort 3_192	0.186301	1	2	1	2	2	0.581622	low
U0494	Meta-testing cohort 3_193	4.66027	0	2	2	0	1	0.58217	low
TCGA_XF_A8HI	Meta-testing cohort 3_194	1.49041	1	1	2	4	2	0.582756	low
TCGA_UY_A78N	Meta-testing cohort 3_195	7.23562	1	2	1	4	2	0.586662	low
GSM4974758	Meta-testing cohort 3_196	3.45205	0	NA	NA	0	1	0.590594	low
U1177	Meta-testing cohort 3_197	2.46575	0	1	1	0	1	0.590594	low
GSM4974713	Meta-testing cohort 3_198	3.69863	0	NA	NA	0	1	0.590594	low
U1205	Meta-testing cohort 3_199	3.28767	0	2	1	0	1	0.590594	low
U1146	Meta-testing cohort 3_2	2.29315	0	2	1	0	2	0.0742104	low
SAM63b2189c36d7	Meta-testing cohort 3_20	0.326742	1	1	1	1	NA	0.132676	low
JMT1_85	Meta-testing cohort 3_200	2.13699	0	NA	NA	1	2	0.596732	low
U0312	Meta-testing cohort 3_201	0.756164	1	2	1	1	1	0.601955	low
JMT1_87	Meta-testing cohort 3_202	5.91781	0	NA	NA	1	2	0.603533	low
U0006	Meta-testing cohort 3_203	3.11507	0	2	1	0	2	0.604267	low
GSM814334	Meta-testing cohort 3_204	1.45919	0	1	1	2	2	0.606862	low
GSM3689012	Meta-testing cohort 3_205	0.994521	0	NA	1	1	2	0.616563	low
U1426	Meta-testing cohort 3_206	0.838356	0	2	2	0	1	0.617412	low
TCGA_KQ_A41S	Meta-testing cohort 3_207	0.0958904	0	2	2	3	2	0.61767	low
p1419_198.CEL	Meta-testing cohort 3_208	0.493151	1	NA	NA	2	2	0.617767	low
GSM3689052	Meta-testing cohort 3_209	0.813699	0	NA	1	2	2	0.618854	low
U1050	Meta-testing cohort 3_21	2.60548	0	1	1	0	1	0.133326	low
GSM3689076	Meta-testing cohort 3_210	4.45479	0	NA	1	1	2	0.618854	low
GSM3689158	Meta-testing cohort 3_211	0.246575	0	NA	1	1	2	0.625294	low
TCGA_E7_A5KF	Meta-testing cohort 3_212	0.0547945	0	2	1	2	1	0.625294	low
GSM1816521	Meta-testing cohort 3_213	0.517808	0	NA	NA	NA	NA	0.625294	low
GSM814194	Meta-testing cohort 3_214	4.47213	0	2	2	0	1	0.629031	low
SAM28e6031ac18b	Meta-testing cohort 3_215	0.758797	1	1	1	1	NA	0.629031	low
GSM4974835	Meta-testing cohort 3_216	4.93151	0	NA	NA	0	1	0.629031	low
GSM340667	Meta-testing cohort 3_217	6.22192	0	1	2	1	1	0.630712	low
SAM7746b76437e6	Meta-testing cohort 3_218	0.23223	1	1	1	1	NA	0.630712	low
U0189	Meta-testing cohort 3_219	2.16164	0	2	2	0	2	0.631793	low
U0421	Meta-testing cohort 3_22	1.49589	0	2	1	0	1	0.139854	low
U0048	Meta-testing cohort 3_220	3.16438	0	2	1	0	2	0.631793	low
JMT1_18	Meta-testing cohort 3_221	1.27397	0	NA	NA	1	2	0.631793	low
TCGA_E7_A8O8	Meta-testing cohort 3_222	0.0356164	0	1	1	2	2	0.631793	low
GSM814129	Meta-testing cohort 3_223	1.07818	0	2	1	1	1	0.631793	low
GSM4974751	Meta-testing cohort 3_224	4.93151	0	NA	NA	1	2	0.635569	low
p1404_156.CEL	Meta-testing cohort 3_225	0.493151	1	NA	NA	2	2	0.636634	low
GSM814119	Meta-testing cohort 3_226	7.24459	0	2	1	2	2	0.64252	low
GSM786500	Meta-testing cohort 3_227	14.4252	1	2	2	3	2	0.64252	low
BL115	Meta-testing cohort 3_228	2.70411	0	NA	NA	NA	NA	0.64252	low
GSM119502	Meta-testing cohort 3_229	2.30137	0	NA	NA	3	NA	0.651051	low
GSM814167	Meta-testing cohort 3_23	3.54258	0	2	1	0	1	0.142249	low
GSM3699758	Meta-testing cohort 3_230	3.86301	0	2	2	0	2	0.651645	low
GSM806858	Meta-testing cohort 3_231	6.01239	0	2	2	0	1	0.652701	low
U0069	Meta-testing cohort 3_232	1.8	0	2	2	0	2	0.654222	low
GSM340741.y	Meta-testing cohort 3_233	3.25479	0	1	1	1	1	0.655594	low
SAMd7d57ee3a863	Meta-testing cohort 3_234	1.66611	0	1	1	4	NA	0.655594	low
U0496	Meta-testing cohort 3_235	2.93425	0	1	1	0	1	0.671258	low
FR_34_U133_2.CEL	Meta-testing cohort 3_236	3.86301	0	2	1	2	2	0.673648	low
U0903	Meta-testing cohort 3_237	1.26575	0	2	1	0	1	0.674644	low
GSM3689157	Meta-testing cohort 3_238	0.000273973	0	NA	1	1	2	0.679805	low
U0122	Meta-testing cohort 3_239	2.46575	0	2	1	0	1	0.685401	low
U0870	Meta-testing cohort 3_24	3.99452	0	2	1	0	2	0.143727	low
GSM3689122	Meta-testing cohort 3_240	0.000273973	0	NA	1	0	2	0.685401	low
GSM119722	Meta-testing cohort 3_241	7.06849	0	NA	NA	3	NA	0.685401	low
TCGA_FD_A43X	Meta-testing cohort 3_242	0.30137	0	2	1	2	2	0.685401	low
GSM3689139	Meta-testing cohort 3_243	0.624658	1	NA	1	2	2	0.685401	low
GSM806846	Meta-testing cohort 3_244	3.59932	0	2	1	0	1	0.685401	low
GSM814349	Meta-testing cohort 3_245	0.0410959	0	1	2	0	1	0.687757	low
JMT1_79	Meta-testing cohort 3_246	2.46575	1	NA	NA	1	2	0.692266	low
TCGA_BT_A20J	Meta-testing cohort 3_247	1.5863	1	2	1	2	2	0.692897	low
SAM18a4dabbc557	Meta-testing cohort 3_248	1.35287	1	1	1	2	NA	0.694116	low
TCGA_ZF_A9RD	Meta-testing cohort 3_249	1.11781	1	2	2	4	2	0.694297	low
UCC_EU2015_48	Meta-testing cohort 3_25	1.41781	0	2	2	0	NA	0.148071	low
U0010	Meta-testing cohort 3_250	3.29589	0	2	1	0	1	0.701693	low
TCGA_CF_A47S	Meta-testing cohort 3_251	0.912329	0	1	1	2	1	0.703798	low
GSM2454229	Meta-testing cohort 3_252	10.8493	1	2	2	0	1	0.705367	low
GSM4974800	Meta-testing cohort 3_253	3.45205	0	NA	NA	0	1	0.71711	low
TCGA_C4_A0F7	Meta-testing cohort 3_254	0.169863	1	2	1	4	2	0.71966	low
GSM340675	Meta-testing cohort 3_255	2.05753	1	2	1	1	2	0.72829	low
GSM806876	Meta-testing cohort 3_256	0.618904	1	1	1	2	2	0.728947	low
TCGA_XF_A9T8	Meta-testing cohort 3_257	1.14521	1	1	1	3	2	0.731232	low
GSM1173918	Meta-testing cohort 3_258	5.69589	1	1	1	3	NA	0.742065	low
GSM1816525	Meta-testing cohort 3_259	25.537	0	NA	NA	NA	NA	0.742065	low
TCGA_DK_A1AC	Meta-testing cohort 3_26	10.9068	0	2	1	3	2	0.149364	low
BLCA_Nac_43	Meta-testing cohort 3_260	6.49315	0	2	2	2	2	0.751274	low
SAM9e11ec6bea80	Meta-testing cohort 3_261	1.26646	1	1	1	4	NA	0.751274	low
GSM786503	Meta-testing cohort 3_262	0.0324042	1	2	1	3	2	0.751274	low
GSM2301874	Meta-testing cohort 3_263	0.296712	1	2	1	3	2	0.751274	low
GSM1816518	Meta-testing cohort 3_264	22.3068	1	NA	NA	NA	NA	0.753282	low
U0570	Meta-testing cohort 3_265	1.36438	0	1	1	0	1	0.754533	low
GSM2454213	Meta-testing cohort 3_266	3.53425	0	1	1	0	1	0.754665	low
GSM814177	Meta-testing cohort 3_267	0.0164384	0	2	1	1	2	0.761943	low
U1314	Meta-testing cohort 3_268	2.86027	0	1	2	0	1	0.766497	low
GSM2454215	Meta-testing cohort 3_269	12.5753	1	1	2	0	1	0.769863	low
GSM3689178	Meta-testing cohort 3_27	2.81918	0	NA	1	0	2	0.152172	low
GSM2454238	Meta-testing cohort 3_270	9.69863	1	2	2	0	1	0.769863	low
GSM814288	Meta-testing cohort 3_271	2.03475	0	2	1	0	1	0.769863	low
FR_81_U133_2.CEL	Meta-testing cohort 3_272	1.39726	1	2	1	3	2	0.769863	low
GSM814199	Meta-testing cohort 3_273	2.39415	0	2	1	1	2	0.773203	low
SAM7d7c54623618	Meta-testing cohort 3_274	1.74442	0	1	1	2	NA	0.773337	low
U1298	Meta-testing cohort 3_275	1.79178	0	2	2	0	1	0.774464	low
GSM71068	Meta-testing cohort 3_276	4.93151	0	NA	NA	0	1	0.774464	low
GSM786577	Meta-testing cohort 3_277	2.70035	1	2	2	3	2	0.776658	low
TCGA_GV_A3QK	Meta-testing cohort 3_278	2.27945	0	1	2	4	2	0.782191	low
BLCA_Nac_128	Meta-testing cohort 3_279	5.0137	0	1	2	2	2	0.782934	low
TCGA_E7_A4IJ	Meta-testing cohort 3_28	1.84658	1	1	1	2	2	0.158942	low
GSM340644	Meta-testing cohort 3_280	6.61096	1	1	1	0	1	0.789628	low
GSM814237	Meta-testing cohort 3_281	4.20191	0	1	2	1	2	0.794272	low
JMT1_54	Meta-testing cohort 3_282	2.15342	0	NA	NA	1	2	0.79647	low
TCGA_G2_A2EK	Meta-testing cohort 3_283	1.32877	0	1	1	2	2	0.79647	low
GSM3689031	Meta-testing cohort 3_284	0.000273973	0	NA	1	1	2	0.797193	low
TCGA_K4_A4AC	Meta-testing cohort 3_285	0.761644	1	2	1	2	2	0.798833	low
BLCA_Cx_219	Meta-testing cohort 3_286	7.80822	0	2	1	3	2	0.801297	low
U0024	Meta-testing cohort 3_287	3.58356	0	1	1	0	1	0.804101	low
GSM4974695	Meta-testing cohort 3_288	4.52055	0	NA	NA	0	1	0.807181	low
BLCA_Cx_248	Meta-testing cohort 3_289	2.63014	1	2	1	2	2	0.808565	low
p1419_290.CEL	Meta-testing cohort 3_29	9.53425	0	NA	NA	1	2	0.161349	low
GSM1167420	Meta-testing cohort 3_290	5.27671	1	2	NA	2	NA	0.808565	low
GSM3689106	Meta-testing cohort 3_291	5.54795	0	NA	1	0	2	0.808565	low
GSM814184	Meta-testing cohort 3_292	5.18011	0	2	1	1	2	0.810178	low
GSM340659.y	Meta-testing cohort 3_293	5.8274	0	1	1	1	1	0.811603	low
GSM814299	Meta-testing cohort 3_294	0.597185	0	2	1	1	2	0.818599	low
GSM814191	Meta-testing cohort 3_295	5.31252	0	2	1	0	1	0.831749	low
TCGA_G2_A2EC	Meta-testing cohort 3_296	1.90685	1	1	2	2	2	0.833972	low
GSM806860	Meta-testing cohort 3_297	6.52603	0	2	2	1	1	0.835186	low
GSM814162	Meta-testing cohort 3_298	5.71244	0	1	1	0	1	0.835186	low
GSM340708.x	Meta-testing cohort 3_299	3.62466	0	2	1	1	2	0.838956	low
GSM814240	Meta-testing cohort 3_3	4.62075	0	1	1	2	2	0.0747039	low
JMT1_8	Meta-testing cohort 3_30	1.43836	0	NA	NA	1	2	0.166218	low
BLCA_Nac_100	Meta-testing cohort 3_300	7.15068	0	1	1	3	2	0.839025	low
TCGA_FD_A5BT	Meta-testing cohort 3_301	0.89863	1	2	1	3	2	0.839025	low
U0323	Meta-testing cohort 3_302	5.33425	0	2	1	1	2	0.841092	low
GSM806841	Meta-testing cohort 3_303	5.93425	0	2	2	0	1	0.841195	low
GSM1167380	Meta-testing cohort 3_304	2.98356	0	2	NA	3	NA	0.843551	low
JMT1_83	Meta-testing cohort 3_305	9.0411	0	NA	NA	1	2	0.844321	low
p1404_127_re.CEL	Meta-testing cohort 3_306	2.85892	1	NA	NA	2	2	0.846258	low
SAM4305ab968b90	Meta-testing cohort 3_307	0.116115	1	1	1	1	NA	0.854607	low
GSM1173906	Meta-testing cohort 3_308	10.2822	1	2	1	3	NA	0.854607	low
GSM1709067	Meta-testing cohort 3_309	2.84877	0	1	NA	4	NA	0.854607	low
TCGA_4Z_AA87	Meta-testing cohort 3_31	3.98356	0	2	1	3	2	0.170235	low
GSM3689008	Meta-testing cohort 3_310	0.189041	0	NA	2	1	2	0.861189	low
TCGA_BT_A20Q	Meta-testing cohort 3_311	1.62466	1	2	1	4	2	0.861189	low
SAM0257bbbbd388	Meta-testing cohort 3_312	1.28536	1	1	1	2	NA	0.861189	low
U0076	Meta-testing cohort 3_313	3.05753	0	2	1	0	2	0.861189	low
U0584	Meta-testing cohort 3_314	3.12329	0	1	1	0	1	0.861189	low
GSM786491	Meta-testing cohort 3_315	8.53039	1	1	1	2	2	0.861189	low
TCGA_DK_A1AG	Meta-testing cohort 3_316	1.30137	0	2	1	3	2	0.865533	low
GSM2301905	Meta-testing cohort 3_317	20.4723	1	1	1	3	2	0.866197	low
GSM4974656	Meta-testing cohort 3_318	2.79452	0	NA	NA	0	1	0.877173	low
GSM1167449	Meta-testing cohort 3_319	2.97534	1	1	NA	3	NA	0.877173	low
U0627	Meta-testing cohort 3_32	0.115068	1	1	2	1	2	0.172531	low
GSM4974722	Meta-testing cohort 3_320	4.93151	0	NA	NA	0	1	0.877173	low
U0094	Meta-testing cohort 3_321	2.93425	0	1	1	0	1	0.877173	low
TCGA_E7_A8O7	Meta-testing cohort 3_322	1.27671	0	1	1	2	1	0.877546	low
TCGA_UY_A78M	Meta-testing cohort 3_323	1.89041	1	2	2	4	2	0.878715	low
p1419_240.CEL	Meta-testing cohort 3_324	6.65753	0	NA	NA	2	2	0.882678	low
GSM814155	Meta-testing cohort 3_325	5.9016	0	2	1	0	1	0.884403	low
TCGA_UY_A9PB	Meta-testing cohort 3_326	2.46301	0	1	1	3	2	0.885958	low
FR_70_U133_2.CEL	Meta-testing cohort 3_327	1.72603	0	2	1	3	2	0.893631	low
GSM119725	Meta-testing cohort 3_328	2.30137	0	NA	NA	3	NA	0.893631	low
GSM814092	Meta-testing cohort 3_329	2.18067	1	2	1	2	2	0.893631	low
U0078	Meta-testing cohort 3_33	3.51781	0	1	1	0	1	0.173999	low
GSM119723	Meta-testing cohort 3_330	2.9589	0	NA	NA	3	NA	0.894447	low
SAMaf42c1541269	Meta-testing cohort 3_331	0.453658	0	1	1	2	NA	0.896019	low
BLCA_Nac_118	Meta-testing cohort 3_332	6	0	2	2	3	2	0.904233	low
GSM340719.x	Meta-testing cohort 3_333	3.00548	0	1	1	1	1	0.906286	low
GSM2301775	Meta-testing cohort 3_334	4.99068	0	2	1	3	2	0.909407	low
U0385	Meta-testing cohort 3_335	1.93973	0	2	1	1	2	0.909547	low
GSM4974659	Meta-testing cohort 3_336	4.93151	0	NA	NA	0	2	0.910217	low
UCC_EU2015_38	Meta-testing cohort 3_337	3.14466	0	2	1	0	NA	0.915985	low
JMT1_82	Meta-testing cohort 3_338	2.9589	0	NA	NA	1	2	0.923622	low
SAM6964a6d7b967	Meta-testing cohort 3_339	1.33667	1	1	1	2	NA	0.928711	low
UCC_EU2015_18	Meta-testing cohort 3_34	4.2337	0	2	2	1	NA	0.18288	low
GSM71046	Meta-testing cohort 3_340	4.93151	0	NA	NA	0	2	0.928711	low
SAM6792d6e98068	Meta-testing cohort 3_341	0.494163	1	1	1	1	NA	0.928711	low
GSM3689111	Meta-testing cohort 3_342	0.978082	0	NA	1	0	1	0.928711	low
GSM3689130	Meta-testing cohort 3_343	0.000273973	0	NA	1	1	2	0.928711	low
GSM4974807	Meta-testing cohort 3_344	3.94521	0	NA	NA	1	2	0.928711	low
GSM814208	Meta-testing cohort 3_345	5.25847	0	2	1	0	1	0.928711	low
BL013	Meta-testing cohort 3_346	4.43836	0	NA	NA	NA	NA	0.928711	low
BL008	Meta-testing cohort 3_347	3.25479	0	NA	NA	NA	NA	0.928711	low
GSM3689049	Meta-testing cohort 3_348	5.9589	0	NA	1	0	1	0.928711	low
GSM814210	Meta-testing cohort 3_349	5.07202	0	1	1	0	1	0.928711	low
GSM3699774	Meta-testing cohort 3_35	5.42466	0	1	1	0	1	0.191922	low
SAM0684af734db1	Meta-testing cohort 3_350	1.91184	0	1	2	1	NA	0.928711	low
U1174	Meta-testing cohort 3_351	2.96712	0	1	2	0	1	0.928711	low
TCGA_E7_A85H	Meta-testing cohort 3_352	1.07945	0	1	1	3	2	0.932902	low
GSM2454220	Meta-testing cohort 3_353	11.8356	0	1	1	0	1	0.932902	low
U0777	Meta-testing cohort 3_354	3.30411	0	2	1	1	2	0.940961	low
p1419_204.CEL	Meta-testing cohort 3_355	0.986301	1	NA	NA	2	2	0.944479	low
BL031	Meta-testing cohort 3_356	0.50137	1	NA	NA	NA	NA	0.94614	low
GSM119720	Meta-testing cohort 3_357	8.21918	0	NA	NA	3	NA	0.94614	low
U1291	Meta-testing cohort 3_358	1.98904	0	2	1	0	1	0.961476	low
GSM1709086	Meta-testing cohort 3_359	5.42795	1	2	NA	0	NA	0.964045	low
U0976	Meta-testing cohort 3_36	3.95342	0	1	2	0	1	0.192659	low
U1430	Meta-testing cohort 3_360	3.22192	0	2	1	0	2	0.965269	low
GSM4974773	Meta-testing cohort 3_361	4.93151	0	NA	NA	1	2	0.969804	low
BL043	Meta-testing cohort 3_362	0.90411	1	NA	NA	NA	NA	0.969804	low
BLCA_Nac_79	Meta-testing cohort 3_363	7.23288	0	2	2	2	2	0.969804	low
U0349	Meta-testing cohort 3_364	5.04658	0	2	1	0	1	0.970795	low
GSM3689131	Meta-testing cohort 3_365	0.090411	0	NA	1	1	2	0.973714	low
SAM31d9176e11fb	Meta-testing cohort 3_366	1.40688	0	1	1	1	NA	0.973714	low
GSM3689107	Meta-testing cohort 3_367	0.000273973	0	NA	1	0	2	0.973714	low
TCGA_XF_A9SH	Meta-testing cohort 3_368	5.4	1	2	2	2	2	0.975131	low
GSM806851	Meta-testing cohort 3_369	6.97707	0	2	2	0	1	0.978099	low
GSM4974775	Meta-testing cohort 3_37	4.93151	0	NA	NA	0	2	0.196449	low
GSM814358	Meta-testing cohort 3_370	2.47791	0	1	1	1	1	0.985266	low
BLCA_Cx_241	Meta-testing cohort 3_371	1.06849	1	2	1	3	2	0.985266	low
BLCA_Nac_62	Meta-testing cohort 3_372	5.91781	0	2	1	2	2	0.987231	low
BL110	Meta-testing cohort 3_373	0.928767	0	NA	NA	NA	NA	0.997493	low
U0169	Meta-testing cohort 3_374	0.090411	0	2	2	3	2	0.998285	low
TCGA_XF_AAMH	Meta-testing cohort 3_375	0.942466	1	2	1	4	2	1.00928	low
BL086	Meta-testing cohort 3_376	0.00821918	1	NA	NA	NA	NA	1.01379	low
SAMd027124354ce	Meta-testing cohort 3_377	1.93345	0	1	2	3	NA	1.0142	low
GSM340661	Meta-testing cohort 3_378	6.59178	0	2	1	1	1	1.0165	low
U0171	Meta-testing cohort 3_379	3.32877	0	2	1	0	2	1.0165	low
UCC_EU2015_47	Meta-testing cohort 3_38	2.24712	0	2	2	2	NA	0.197773	low
p1419_239.CEL	Meta-testing cohort 3_380	1.6024	0	NA	NA	2	2	1.02238	low
GSM786566	Meta-testing cohort 3_381	4.26925	1	2	1	2	2	1.02238	low
GSM4974675	Meta-testing cohort 3_382	0.821918	1	NA	NA	1	2	1.02431	high
p1404_131_re.CEL	Meta-testing cohort 3_383	6.73973	0	NA	NA	2	2	1.03859	high
BLCA_Nac_8	Meta-testing cohort 3_384	6.41096	0	1	2	3	2	1.0394	high
U1478	Meta-testing cohort 3_385	1.06849	0	2	1	1	2	1.03978	high
BL075	Meta-testing cohort 3_386	3.83014	0	NA	NA	NA	NA	1.04137	high
GSM814164	Meta-testing cohort 3_387	5.72595	0	2	1	0	1	1.04306	high
GSM4974669	Meta-testing cohort 3_388	0.328767	0	NA	NA	0	2	1.04306	high
BL049	Meta-testing cohort 3_389	3.83014	0	NA	NA	NA	NA	1.04633	high
U1018	Meta-testing cohort 3_39	1.9726	0	1	1	1	1	0.19816	low
U1462	Meta-testing cohort 3_390	0.690411	0	2	1	1	1	1.04939	high
SAM8a1b0e02ee42	Meta-testing cohort 3_391	1.69042	0	1	1	2	NA	1.04939	high
GSM814098	Meta-testing cohort 3_392	6.07183	0	2	2	0	1	1.05209	high
GSM806840	Meta-testing cohort 3_393	7.28219	0	1	2	0	1	1.07768	high
GSM340768	Meta-testing cohort 3_394	0.553425	0	1	1	1	1	1.07921	high
TCGA_CU_A0YO	Meta-testing cohort 3_395	0.408219	1	2	1	4	2	1.08637	high
GSM814264	Meta-testing cohort 3_396	3.67769	0	2	2	0	1	1.08701	high
GSM340642	Meta-testing cohort 3_397	8.71479	0	2	1	1	1	1.08955	high
SAM1ab1b28d9f2b	Meta-testing cohort 3_398	0.172822	1	1	2	2	NA	1.09081	high
GSM806839	Meta-testing cohort 3_399	1.19425	1	2	2	2	1	1.09081	high
U1336	Meta-testing cohort 3_4	2.03014	0	2	1	0	1	0.0749901	low
BLCA_Nac_89	Meta-testing cohort 3_40	4.76712	0	2	1	2	2	0.201161	low
GSM1709099	Meta-testing cohort 3_400	4.44247	1	1	NA	0	NA	1.09081	high
GSM814330	Meta-testing cohort 3_401	1.5997	0	2	1	0	1	1.09081	high
GSM814298	Meta-testing cohort 3_402	2.49683	0	2	1	0	2	1.09183	high
GSM3689141	Meta-testing cohort 3_403	0.780822	0	NA	1	1	2	1.09372	high
GSM1709066	Meta-testing cohort 3_404	1.15808	0	2	NA	4	NA	1.09372	high
GSM786574	Meta-testing cohort 3_405	3.51045	0	1	1	2	2	1.09372	high
SAMb8070b7937e7	Meta-testing cohort 3_406	1.72822	1	1	1	1	NA	1.09372	high
GSM4974843	Meta-testing cohort 3_407	0.739726	1	NA	NA	1	2	1.09836	high
TCGA_XF_A8HE	Meta-testing cohort 3_408	10.4575	0	1	1	3	2	1.09985	high
U0104	Meta-testing cohort 3_409	1.13425	0	2	1	1	2	1.10214	high
TCGA_XF_A9T0	Meta-testing cohort 3_41	2.18904	0	2	1	3	2	0.202542	low
GSM4974639	Meta-testing cohort 3_410	4.93151	0	NA	NA	0	1	1.10214	high
GSM814273	Meta-testing cohort 3_411	2.65626	0	1	1	0	1	1.10434	high
GSM1167441	Meta-testing cohort 3_412	0.353425	0	2	NA	3	NA	1.10509	high
FR_83_U133_2.CEL	Meta-testing cohort 3_413	0.164384	1	2	1	3	2	1.10924	high
TCGA_GU_A42P	Meta-testing cohort 3_414	0.909589	1	2	1	4	2	1.11391	high
GSM4974678	Meta-testing cohort 3_415	4.93151	0	NA	NA	1	2	1.11582	high
BLCA_Nac_96	Meta-testing cohort 3_416	2.21918	1	2	2	4	2	1.11582	high
GSM2301879	Meta-testing cohort 3_417	0.280274	1	2	1	4	2	1.11582	high
GSM4974685	Meta-testing cohort 3_418	4.93151	0	NA	NA	0	2	1.11582	high
TCGA_BT_A20U	Meta-testing cohort 3_419	1.24658	1	2	2	3	2	1.11582	high
TCGA_DK_A3X2	Meta-testing cohort 3_42	1.49863	1	2	1	4	2	0.208086	low
TCGA_BT_A2LB	Meta-testing cohort 3_420	1.34795	1	2	2	3	2	1.11582	high
GSM2301786	Meta-testing cohort 3_421	5.73452	1	2	1	3	2	1.1188	high
GSM2301777	Meta-testing cohort 3_422	0.994521	1	1	1	1	2	1.13167	high
GSM786567	Meta-testing cohort 3_423	1.23406	1	1	1	2	2	1.13167	high
SAMeff2ce356ccb	Meta-testing cohort 3_424	0.664285	1	1	1	1	NA	1.13167	high
GSM814290	Meta-testing cohort 3_425	0.975493	0	2	1	0	1	1.13167	high
GSM4974718	Meta-testing cohort 3_426	4.93151	0	NA	NA	0	1	1.13511	high
TCGA_K4_AAQO	Meta-testing cohort 3_427	0.983562	0	1	1	3	2	1.13678	high
GSM814123	Meta-testing cohort 3_428	6.5258	0	2	2	1	1	1.13843	high
UCC_EU2015_46	Meta-testing cohort 3_429	0.0106849	1	2	1	3	NA	1.13843	high
UCC37_primary	Meta-testing cohort 3_43	3.06411	1	2	1	3	NA	0.220176	low
GSM814355	Meta-testing cohort 3_430	0.556652	0	2	1	0	1	1.13843	high
GSM1709083	Meta-testing cohort 3_431	3.96164	1	1	NA	3	NA	1.14471	high
TCGA_FD_A3SP	Meta-testing cohort 3_432	2.14521	0	1	1	3	2	1.14672	high
TCGA_XF_AAN2	Meta-testing cohort 3_433	5.12055	1	2	1	2	2	1.14753	high
TCGA_FD_A43P	Meta-testing cohort 3_434	2.27945	0	2	1	2	2	1.14954	high
GSM2301782	Meta-testing cohort 3_435	3.40603	1	2	1	3	2	1.1649	high
GSM3689174	Meta-testing cohort 3_436	1.29863	0	NA	1	1	2	1.1649	high
GSM340729	Meta-testing cohort 3_437	2.71781	0	2	1	2	1	1.1649	high
GSM3699786	Meta-testing cohort 3_438	2.87671	0	2	1	0	1	1.1649	high
GSM4974759	Meta-testing cohort 3_439	4.93151	0	NA	NA	0	1	1.17117	high
U0207	Meta-testing cohort 3_44	0.460274	0	2	2	0	2	0.220186	low
GSM814089	Meta-testing cohort 3_440	8.06065	0	1	1	1	1	1.17159	high
GSM4974788	Meta-testing cohort 3_441	4.93151	0	NA	NA	0	1	1.1784	high
GSM814281	Meta-testing cohort 3_442	2.08069	0	2	2	0	1	1.18057	high
GSM806850	Meta-testing cohort 3_443	6.97973	0	2	1	0	1	1.18856	high
GSM814256	Meta-testing cohort 3_444	3.72092	0	2	1	0	1	1.18856	high
GSM1173941	Meta-testing cohort 3_445	3.63288	1	2	1	3	NA	1.18856	high
p1404_134_re.CEL	Meta-testing cohort 3_446	0.821918	1	NA	NA	3	2	1.18856	high
GSM3689091	Meta-testing cohort 3_447	1.1589	0	NA	1	0	1	1.18856	high
SAM18039827e1b9	Meta-testing cohort 3_448	0.121516	1	1	1	2	NA	1.19566	high
GSM814321	Meta-testing cohort 3_449	1.95639	0	1	1	0	1	1.19566	high
TCGA_CF_A9FM	Meta-testing cohort 3_45	1.09041	0	1	1	1	2	0.221652	low
U0664	Meta-testing cohort 3_450	3.80548	0	2	1	0	1	1.19885	high
BLCA_Nac_101	Meta-testing cohort 3_451	6.08219	0	2	1	2	1	1.19886	high
U1317	Meta-testing cohort 3_452	2.76986	0	2	2	0	1	1.20217	high
GSM3689029	Meta-testing cohort 3_453	0.419178	0	NA	1	1	2	1.20814	high
SAM2eb07dedf07f	Meta-testing cohort 3_454	1.68502	0	1	1	2	NA	1.20874	high
TCGA_GC_A3RC	Meta-testing cohort 3_455	1.32603	0	1	1	2	2	1.20874	high
TCGA_G2_A2EO	Meta-testing cohort 3_456	4.94247	1	2	1	3	2	1.21086	high
GSM1167375	Meta-testing cohort 3_457	3.51781	0	1	NA	2	NA	1.22135	high
TCGA_DK_A6AV	Meta-testing cohort 3_458	5.34795	0	2	2	2	2	1.22806	high
TCGA_FD_A5BR	Meta-testing cohort 3_459	2.2274	0	1	1	2	2	1.2354	high
U0042	Meta-testing cohort 3_46	3.71507	0	2	1	0	1	0.223365	low
BLCA_Nac_130	Meta-testing cohort 3_460	5.42466	0	1	2	2	2	1.23566	high
GSM1167402	Meta-testing cohort 3_461	9.05753	0	2	NA	3	NA	1.24115	high
FR_14_U133_2.CEL	Meta-testing cohort 3_462	0.328767	1	2	1	3	2	1.24115	high
FR_28_U133_2.CEL	Meta-testing cohort 3_463	4.0274	0	2	1	3	2	1.24115	high
SAM4edbe45817b3	Meta-testing cohort 3_464	0.0864111	1	1	1	3	NA	1.24447	high
GSM814121	Meta-testing cohort 3_465	7.00409	0	2	1	1	2	1.26077	high
BLCA_Nac_11	Meta-testing cohort 3_466	1.15068	1	1	2	3	2	1.26591	high
GSM1816531	Meta-testing cohort 3_467	5.38356	0	NA	NA	NA	NA	1.26591	high
GSM814159	Meta-testing cohort 3_468	4.03978	0	2	1	1	2	1.26591	high
GSM806861	Meta-testing cohort 3_469	0.434795	0	1	1	1	2	1.26591	high
U1425	Meta-testing cohort 3_47	2.21918	0	2	1	0	1	0.224403	low
BLCA_Cx_131	Meta-testing cohort 3_470	6.73973	0	1	1	2	2	1.26591	high
SAM7b40007f4aa4	Meta-testing cohort 3_471	1.77953	0	1	2	4	NA	1.26591	high
U1031	Meta-testing cohort 3_472	1.77534	0	1	1	0	1	1.26591	high
FR_93_U133_2.CEL	Meta-testing cohort 3_473	0.657534	1	1	1	3	2	1.2693	high
GSM806821	Meta-testing cohort 3_474	8.2471	0	1	1	0	1	1.2693	high
GSM1173970	Meta-testing cohort 3_475	2.63836	0	2	2	3	NA	1.2693	high
GSM2301792	Meta-testing cohort 3_476	2.4411	0	2	2	1	2	1.2693	high
TCGA_DK_A6B1	Meta-testing cohort 3_477	5.6137	0	2	1	2	2	1.27688	high
GSM340725	Meta-testing cohort 3_478	2.8137	0	2	1	3	2	1.30799	high
GSM814251	Meta-testing cohort 3_479	3.34532	0	2	2	2	2	1.31408	high
BLCA_Nac_52	Meta-testing cohort 3_48	0.657534	1	2	1	3	NA	0.225824	low
p1404_78.CEL	Meta-testing cohort 3_480	3.37504	0	NA	NA	1	2	1.31542	high
GSM1167347	Meta-testing cohort 3_481	0.279452	0	1	NA	4	NA	1.31706	high
FR_073_U133_2.CEL	Meta-testing cohort 3_482	2.87671	1	1	1	3	2	1.31926	high
GSM1709081	Meta-testing cohort 3_483	3.28603	1	1	NA	0	NA	1.32919	high
GSM2301885	Meta-testing cohort 3_484	3.52767	1	2	1	3	2	1.32919	high
GSM786563	Meta-testing cohort 3_485	1.04503	1	2	1	3	2	1.32919	high
TCGA_XF_AAMT	Meta-testing cohort 3_486	0.246575	1	2	2	4	2	1.33274	high
TCGA_2F_A9KR	Meta-testing cohort 3_487	8.72055	1	1	2	3	2	1.33679	high
[truncated: 1,136 more rows]

## Sheet: Table S7
Table S7: The details about the BLCA patients in TCGA-BLCA cohort.
Sample ID	Sample ID	Sample ID	TMB	Mutation_Count	StromalScore	ImmuneScore	TumorPurity	HRDscore	mRNAsi	EREG-mRNAsi	mDNAsi	EREG-mDNAsi	MSI	MSI MANTIS Score	MSIsensor Score	TCRPIscore	TCRPI group
TCGA_2F_A9KO	TCGA_2F_A9KO_01A	TCGA-2F-A9KO-01	15.1579	500	-287.96	818.857	0.775258	41	0.382784	0.682814	0.154626	0.236445	0.3271	0.3271	0	1.31711	High
TCGA_2F_A9KP	TCGA_2F_A9KP_01A	TCGA-2F-A9KP-01	4.31579	131	-1750.55	306.713	0.762669	28	0.489702	0.727742	0.283592	0.40574	0.3234	0.3234	0.17	1.99127	High
TCGA_2F_A9KQ	TCGA_2F_A9KQ_01A	TCGA-2F-A9KQ-01	2.15789	62	-1333.61	-950.967	0.979571	9	0.35467	0.486123	0.370047	0.489747	0.3181	0.3181	0.12	1.54668	High
TCGA_2F_A9KR	TCGA_2F_A9KR_01A	TCGA-2F-A9KR-01	6.60526	210	-1579.49	-1084.14	0.980338	10	0.35763	0.392337	0.257228	0.362301	0.3282	0.3282	0.14	1.33679	High
TCGA_2F_A9KT	TCGA_2F_A9KT_01A	TCGA-2F-A9KT-01	10.4474	339	-1046.17	1866.52	0.672094	26	0.363458	0.545436	0.232678	0.337552	0.3309	0.3309	0	2.75982	High
TCGA_2F_A9KW	TCGA_2F_A9KW_01A	TCGA-2F-A9KW-01	3.57895	95	-185.08	-917.863	0.960667	48	0.436324	0.387972	0.242727	0.346188	0.3256	0.3256	0.09	2.39206	High
TCGA_4Z_AA7M	TCGA_4Z_AA7M_01A	TCGA-4Z-AA7M-01	16.3158	480	-1162.63	980.442	0.773445	46	0.463472	0.254632	0.251175	0.358256	0.3448	0.3448	0.2	0.108756	Low
TCGA_4Z_AA7N	TCGA_4Z_AA7N_01A	TCGA-4Z-AA7N-01	0.0263158	12	714.25	-629.943	0.958802	NA	0.245673	0.550249	0.162122	0.224539	0.329	0.329	0.01	1.17787	High
TCGA_4Z_AA7O	TCGA_4Z_AA7O_01A	TCGA-4Z-AA7O-01	6.5	165	-790.23	-511.816	0.887521	12	0.342353	0.589555	0.312494	0.433269	0.3371	0.3371	0	0.415572	Low
TCGA_4Z_AA7Q	TCGA_4Z_AA7Q_01A	TCGA-4Z-AA7Q-01	5.47368	226	-735.76	-495.649	0.928848	41	0.470142	0.611516	0.235607	0.322555	0.3387	0.3387	0	0.479127	Low
TCGA_4Z_AA7R	TCGA_4Z_AA7R_01A	TCGA-4Z-AA7R-01	11.3421	321	-1085.7	-290.518	0.85563	51	0.484861	0.837421	0.315729	0.425808	0.35	0.35	0.38	2.41936	High
TCGA_4Z_AA7S	TCGA_4Z_AA7S_01A	TCGA-4Z-AA7S-01	1.81579	58	-1504.53	-402.889	0.936231	10	0.431374	0.584555	0.244904	0.348831	0.3217	0.3217	0.12	1.07921	High
TCGA_4Z_AA7W	TCGA_4Z_AA7W_01A	TCGA-4Z-AA7W-01	14.3947	519	-310.27	-91.9692	0.844478	55	0.457943	0.679655	0.217634	0.300211	0.3296	0.3296	0.04	0.44222	Low
TCGA_4Z_AA7Y	TCGA_4Z_AA7Y_01A	TCGA-4Z-AA7Y-01	9.36842	264	-1845.87	-603.923	0.902893	7	0.395739	0.670683	0.260924	0.363666	0.3253	0.3253	0.01	1.62444	High
TCGA_4Z_AA80	TCGA_4Z_AA80_01A	TCGA-4Z-AA80-01	10.4474	380	-1899.76	-351.781	0.928462	64	0.57863	0.712043	0.335653	0.438426	0.3335	0.3335	0.06	2.38568	High
TCGA_4Z_AA81	TCGA_4Z_AA81_01A	TCGA-4Z-AA81-01	6.42105	195	-1440.73	-568.234	0.938678	18	0.480695	0.544916	0.296921	0.400586	0.3349	0.3349	0.05	0.488008	Low
TCGA_4Z_AA82	TCGA_4Z_AA82_01A	TCGA-4Z-AA82-01	2.73684	95	-344.4	2004.5	0.544444	23	0.382861	0.669009	0.190089	0.291732	0.3367	0.3367	0.02	1.50375	High
TCGA_4Z_AA83	TCGA_4Z_AA83_01A	TCGA-4Z-AA83-01	2.94737	76	-983.87	714.84	0.840616	3	0.276463	0.435298	0.234708	0.322413	0.3215	0.3215	0	1.45271	High
TCGA_4Z_AA84	TCGA_4Z_AA84_01A	TCGA-4Z-AA84-01	15.8684	424	-1127.32	135.681	0.872037	68	0.535941	0.730529	0.24866	0.326844	0.3257	0.3257	0	0.978645	Low
TCGA_4Z_AA86	TCGA_4Z_AA86_01A	TCGA-4Z-AA86-01	5.39474	197	482.06	1178.3	0.78118	44	0.381864	0.670129	0.169597	0.235348	0.3293	0.3293	0	1.56308	High
TCGA_4Z_AA87	TCGA_4Z_AA87_01A	TCGA-4Z-AA87-01	7.44737	231	-948.59	-1292.83	0.990961	54	0.572167	0.778157	0.305442	0.42744	0.3459	0.3459	0.16	0.170235	Low
TCGA_4Z_AA89	TCGA_4Z_AA89_01A	TCGA-4Z-AA89-01	3.71053	126	-2344.59	-855.334	0.966346	10	0.41343	0.511291	0.239639	0.346269	0.3261	0.3261	0.08	0.288772	Low
TCGA_5N_A9KI	TCGA_5N_A9KI_01A	TCGA-5N-A9KI-01	5.31579	153	-189.44	-986.506	0.95432	31	0.352132	0.631351	0.265598	0.377537	0.3453	0.3453	0.02	1.54289	High
TCGA_5N_A9KM	TCGA_5N_A9KM_01A	TCGA-5N-A9KM-01	7.07895	190	-315.97	-938.981	0.975389	34	0.355438	0.640237	0.256257	0.371873	0.341	0.341	0.03	2.72366	High
TCGA_BL_A0C8	TCGA_BL_A0C8_01A	TCGA-BL-A0C8-01	3.44737	110	-730.89	1886.93	0.602544	37	NA	NA	NA	NA	0.2942	0.2942	1.5	0.854607	Low
TCGA_BL_A13I	TCGA_BL_A13I_01A	TCGA-BL-A13I-01	2.63158	100	740.38	-977.179	0.96945	5	0.373267	0.74783	0.162292	0.21194	0.3343	0.3343	0.32	1.07845	High
TCGA_BL_A13J	TCGA_BL_A13J_01A	TCGA-BL-A13J-01	2.36842	97	-220.89	2093.81	0.642026	43	0.333027	0.579813	0.192401	0.299372	0.4	0.4	0.64	0.861189	Low
TCGA_BL_A3JM	TCGA_BL_A3JM_01A	TCGA-BL-A3JM-01	6.84211	182	-656.99	-785.31	0.973443	7	0.532729	0.765087	0.275116	0.340505	0.3391	0.3391	0.31	2.24173	High
TCGA_BL_A5ZZ	TCGA_BL_A5ZZ_01A	TCGA-BL-A5ZZ-01	5.57895	149	845.92	-874.107	0.978034	13	0.229059	0.739353	0.225452	0.310963	0.3018	0.3018	0.01	3.26058	High
TCGA_BT_A0S7	TCGA_BT_A0S7_01A	TCGA-BT-A0S7-01	1.26316	37	-644.29	300.163	0.902317	22	0.477072	0.573892	0.197326	0.277496	0.2768	0.2768	0.13	1.03859	High
TCGA_BT_A0YX	TCGA_BT_A0YX_01A	TCGA-BT-A0YX-01	20.5789	592	-761.04	-122.339	0.857249	16	0.449138	0.626947	0.208469	0.278173	0.2734	0.2734	0	0.90524	Low
TCGA_BT_A20J	TCGA_BT_A20J_01A	TCGA-BT-A20J-01	12.9211	427	-476.29	81.1165	0.890372	51	0.502179	0.683574	0.214094	0.301835	0.2897	0.2897	0.03	0.692897	Low
TCGA_BT_A20N	TCGA_BT_A20N_01A	TCGA-BT-A20N-01	6.97368	240	-1211.55	-472.426	0.973367	63	0.486018	0.706485	0.175262	0.266974	0.2995	0.2995	0.22	1.11582	High
TCGA_BT_A20O	TCGA_BT_A20O_01A	TCGA-BT-A20O-01	2.71053	174	949.5	-779.173	0.946057	4	0.397009	0.601626	0.148681	0.208564	0.2813	0.2813	0	0.603259	Low
TCGA_BT_A20P	TCGA_BT_A20P_01A	TCGA-BT-A20P-01	3.10526	87	-1637.91	813.888	0.737547	11	0.401029	0.774561	0.112995	0.187876	0.2963	0.2963	0.01	1.33909	High
TCGA_BT_A20Q	TCGA_BT_A20Q_01A	TCGA-BT-A20Q-01	2.97368	90	249.68	1283.63	0.645732	11	0.270234	0.617387	0.127582	0.206533	0.2936	0.2936	0	0.861189	Low
TCGA_BT_A20R	TCGA_BT_A20R_01A	TCGA-BT-A20R-01	7.15789	251	766.75	99.4468	0.8842	27	0.290407	0.769571	0.222446	0.328751	0.3095	0.3095	0	0.861189	Low
TCGA_BT_A20T	TCGA_BT_A20T_01A	TCGA-BT-A20T-01	8.36842	240	-192.84	-468.134	0.978065	25	0.305142	0.687202	0.168798	0.243861	0.2993	0.2993	0.02	1.82444	High
TCGA_BT_A20U	TCGA_BT_A20U_01A	TCGA-BT-A20U-01	2.36842	86	-503.19	189.141	0.820119	9	0.440875	0.718492	0.159589	0.240631	0.3009	0.3009	0	1.11582	High
TCGA_BT_A20V	TCGA_BT_A20V_01A	TCGA-BT-A20V-01	2.89474	99	-1791.8	325.921	0.818284	39	0.508642	0.598952	0.215211	0.301518	0.3292	0.3292	0.39	2.19532	High
TCGA_BT_A20W	TCGA_BT_A20W_01A	TCGA-BT-A20W-01	1.05263	84	-776.97	1982.71	0.615921	18	0.425218	0.677653	0.194955	0.284692	0.2923	0.2923	0	1.11582	High
TCGA_BT_A20X	TCGA_BT_A20X_01A	TCGA-BT-A20X-01	2.28947	69	-443.51	-658.258	0.919535	18	0.391388	0.580962	0.211802	0.319098	0.3094	0.3094	0	2.34691	High
TCGA_BT_A2LA	TCGA_BT_A2LA_01A	TCGA-BT-A2LA-01	7.05263	178	-1558.56	1793.61	0.557008	37	0.540665	0.652657	0.265801	0.364121	0.317	0.317	0.47	1.11582	High
TCGA_BT_A2LB	TCGA_BT_A2LB_01A	TCGA-BT-A2LB-01	20.1842	520	16.96	-195.79	0.852257	23	0.324488	0.479598	0.24134	0.362659	0.3058	0.3058	0.03	1.11582	High
TCGA_BT_A2LD	TCGA_BT_A2LD_01A	TCGA-BT-A2LD-01	2.10526	96	-772.44	-701.518	0.919939	33	0.377198	0.522381	0.255507	0.340615	0.3572	0.3572	0.02	3.56705	High
TCGA_BT_A3PH	TCGA_BT_A3PH_01A	TCGA-BT-A3PH-01	15.2368	418	-1169.71	-622.216	0.906697	19	0.419654	0.542892	0.477313	0.569835	0.3362	0.3362	0.14	4.02244	High
TCGA_BT_A3PJ	TCGA_BT_A3PJ_01A	TCGA-BT-A3PJ-01	16.7105	441	-755.83	615.973	0.683019	43	0.453835	0.519201	0.299216	0.394438	0.3298	0.3298	0	3.48573	High
TCGA_BT_A3PK	TCGA_BT_A3PK_01A	TCGA-BT-A3PK-01	7.21053	347	143.67	-561.589	0.908678	21	0.344193	0.528699	0.182189	0.256205	0.3436	0.3436	0	4.24748	High
TCGA_BT_A42C	TCGA_BT_A42C_01A	TCGA-BT-A42C-01	9.02632	345	-1863.09	556.809	0.797268	53	0.460735	0.650295	0.230996	0.330487	0.3324	0.3324	0.2	3.2782	High
TCGA_BT_A42E	TCGA_BT_A42E_01A	TCGA-BT-A42E-01	5.28947	160	-641.37	415.937	0.845812	56	0.434411	0.551829	0.173208	0.273487	0.324	0.324	0	0.537848	Low
TCGA_BT_A42F	TCGA_BT_A42F_01A	TCGA-BT-A42F-01	3.13158	167	-427.95	1215.69	0.751664	42	0.501895	0.669272	0.218822	0.303612	0.3106	0.3106	0	1.00773	Low
TCGA_C4_A0EZ	TCGA_C4_A0EZ_01A	TCGA-C4-A0EZ-01	6.31579	172	-1432.34	-1033.26	0.960006	17	0.536314	0.366364	0.258448	0.347473	0.2845	0.2845	0.34	1.99127	High
TCGA_C4_A0F0	TCGA_C4_A0F0_01A	TCGA-C4-A0F0-01	2.89474	90	-423.59	2612.14	0.429574	27	0.51371	0.81028	0.253099	0.347906	0.2914	0.2914	0.23	1.23584	High
TCGA_C4_A0F1	TCGA_C4_A0F1_01A	TCGA-C4-A0F1-01	5.68421	154	-542.92	-775.11	0.967517	NA	0.395817	0.601976	0.364062	0.477221	0.2847	0.2847	0	1.03686	High
TCGA_C4_A0F6	TCGA_C4_A0F6_01A	TCGA-C4-A0F6-01	6.5	191	-528.12	157.177	0.774806	17	0.391368	0.558834	0.27052	0.345779	0.2858	0.2858	0.4	1.41948	High
TCGA_C4_A0F7	TCGA_C4_A0F7_01A	TCGA-C4-A0F7-01	2.68421	65	-1105.06	459.08	0.757982	NA	0.483402	0.596323	0.188167	0.308244	0.2902	0.2902	1.39	0.71966	Low
TCGA_CF_A1HR	TCGA_CF_A1HR_01A	TCGA-CF-A1HR-01	4.97368	258	-992.01	-317.788	0.930731	14	0.402101	0.702407	0.198049	0.279021	0.2777	0.2777	0	0.954229	Low
TCGA_CF_A1HS	TCGA_CF_A1HS_01A	TCGA-CF-A1HS-01	5.63158	241	-797.98	-41.9294	0.759789	45	0.494316	0.597587	0.182101	0.254828	0.2912	0.2912	0.26	2.20719	High
TCGA_CF_A27C	TCGA_CF_A27C_01A	TCGA-CF-A27C-01	4.97368	132	-2223.46	5.23613	0.847084	13	0.416791	0.65179	0.265819	0.372487	0.3175	0.3175	0.09	2.56151	High
TCGA_CF_A3MF	TCGA_CF_A3MF_01A	TCGA-CF-A3MF-01	0.552632	23	-1407.91	-1360.15	0.984761	2	0.371811	0.39699	0.366319	0.477618	0.2754	0.2754	1.87	1.18295	High
TCGA_CF_A3MG	TCGA_CF_A3MG_01A	TCGA-CF-A3MG-01	4.28947	127	-2263.3	46.3269	0.917894	16	0.453931	0.552191	0.354281	0.476303	0.3409	0.3409	0.04	2.10212	High
TCGA_CF_A3MH	TCGA_CF_A3MH_01A	TCGA-CF-A3MH-01	1.31579	43	-2071.39	-395.498	0.890583	10	0.371188	0.523011	0.28653	0.420997	0.3457	0.3457	0.07	1.54668	High
TCGA_CF_A3MI	TCGA_CF_A3MI_01A	TCGA-CF-A3MI-01	1.92105	63	-1219.55	-821.415	0.97329	18	0.402817	0.686985	0.352914	0.463142	0.3577	0.3577	0.14	0.455013	Low
TCGA_CF_A47S	TCGA_CF_A47S_01A	TCGA-CF-A47S-01	0.763158	27	-1645.17	2167.75	0.451138	17	0.361198	0.487247	0.169422	0.271262	0.296	0.296	0.05	0.703798	Low
TCGA_CF_A47T	TCGA_CF_A47T_01A	TCGA-CF-A47T-01	0.710526	27	-1423.86	-1052.37	0.992811	7	0.451115	0.6139	0.377182	0.499635	0.3	0.3	0.07	1.0165	Low
TCGA_CF_A47V	TCGA_CF_A47V_01A	TCGA-CF-A47V-01	2.36842	66	-926.41	-1438.71	0.993401	7	0.286536	0.381579	0.160253	0.272444	0.3274	0.3274	0.02	0.697783	Low
TCGA_CF_A47W	TCGA_CF_A47W_01A	TCGA-CF-A47W-01	0.947368	27	-1848.32	301.895	0.903331	0	0.433667	0.585434	0.17873	0.280746	0.3304	0.3304	0	0.291773	Low
TCGA_CF_A47X	TCGA_CF_A47X_01A	TCGA-CF-A47X-01	10.2105	293	-1843.93	-72.7405	0.882511	11	0.422508	0.547909	0.307423	0.395215	0.3251	0.3251	0.02	0.590594	Low
TCGA_CF_A47Y	TCGA_CF_A47Y_01A	TCGA-CF-A47Y-01	2.07895	61	-1728.21	-997.792	0.983615	2	0.316458	0.459428	0.160311	0.254391	0.3205	0.3205	0	1.13511	High
TCGA_CF_A5U8	TCGA_CF_A5U8_01A	TCGA-CF-A5U8-01	1.86842	46	-1866.4	-163.394	0.935694	0	0.37639	0.458692	0.238571	0.358059	0.3098	0.3098	0.03	0.710305	Low
TCGA_CF_A5UA	TCGA_CF_A5UA_01A	TCGA-CF-A5UA-01	2.34211	67	-1781.26	-76.4749	0.89769	22	0.421804	0.713213	0.124996	0.20006	0.3096	0.3096	0.09	0.352263	Low
TCGA_CF_A7I0	TCGA_CF_A7I0_01A	TCGA-CF-A7I0-01	1.71053	37	-565.78	-709.714	0.97289	11	0.308127	0.669067	0.337156	0.446591	0.3211	0.3211	0.01	0.425229	Low
TCGA_CF_A8HX	TCGA_CF_A8HX_01A	TCGA-CF-A8HX-01	2.10526	53	-1721.32	-779.409	0.974462	18	0.382769	0.621462	0.353234	0.491716	0.3363	0.3363	0.03	0.930462	Low
TCGA_CF_A8HY	TCGA_CF_A8HY_01A	TCGA-CF-A8HY-01	2.73684	89	-1819.6	-1231.07	0.985473	22	0.412966	0.46622	0.263565	0.382499	0.3352	0.3352	0.16	1.77018	High
TCGA_CF_A9FF	TCGA_CF_A9FF_01A	TCGA-CF-A9FF-01	3.97368	132	-763.55	-485.464	0.961652	9	0.354174	0.613754	0.262421	0.377983	0.3177	0.3177	0.01	0.564181	Low
TCGA_CF_A9FL	TCGA_CF_A9FL_01A	TCGA-CF-A9FL-01	1.92105	57	-480.63	222.767	0.81948	12	0.279243	0.683345	0.306028	0.417426	0.3227	0.3227	0	2.69814	High
TCGA_CF_A9FM	TCGA_CF_A9FM_01A	TCGA-CF-A9FM-01	0.815789	21	-1704.04	569.363	0.668967	3	NA	NA	NA	NA	0.3169	0.3169	0	0.221652	Low
TCGA_CU_A0YN	TCGA_CU_A0YN_01A	TCGA-CU-A0YN-01	5.13158	146	-248.38	-239.668	0.877926	31	0.418085	0.701094	0.199122	0.276959	0.2856	0.2856	0.07	0.861189	Low
TCGA_CU_A0YO	TCGA_CU_A0YO_01A	TCGA-CU-A0YO-01	2.21053	92	-539.07	-77.1672	0.941465	12	0.316821	0.67043	0.165482	0.246283	0.2791	0.2791	0.01	1.08637	High
TCGA_CU_A0YR	TCGA_CU_A0YR_01A	TCGA-CU-A0YR-01	4.78947	140	-27.82	870.118	0.745694	54	0.482784	0.79118	0.139607	0.203371	0.2754	0.2754	0.05	1.11582	High
TCGA_CU_A3KJ	TCGA_CU_A3KJ_01A	TCGA-CU-A3KJ-01	7.52632	201	-1142.01	-73.0036	0.886301	44	0.385343	0.414562	0.233867	0.343181	0.2424	0.2424	0.35	1.93164	High
TCGA_CU_A3QU	TCGA_CU_A3QU_01A	TCGA-CU-A3QU-01	3.36842	86	-2137.33	-1217.04	0.976882	38	0.501658	0.632618	0.21885	0.298458	0.3389	0.3389	0.47	0.234183	Low
TCGA_CU_A3YL	TCGA_CU_A3YL_01A	TCGA-CU-A3YL-01	7.07895	212	-1052.09	63.9487	0.814335	13	0.337474	0.639478	0.204742	0.304531	0.3192	0.3192	0	0.769587	Low
TCGA_CU_A5W6	TCGA_CU_A5W6_01A	TCGA-CU-A5W6-01	6.89474	201	-1158.8	499.206	0.836555	28	0.423925	0.666319	0.158552	0.238854	0.3127	0.3127	0.05	0.478809	Low
TCGA_CU_A72E	TCGA_CU_A72E_01A	TCGA-CU-A72E-01	3.26316	91	-323.49	-63.4983	0.858344	5	0.323879	0.574088	0.37358	0.468696	0.322	0.322	0.02	2.56151	High
TCGA_DK_A1A3	TCGA_DK_A1A3_01A	TCGA-DK-A1A3-01	19.9474	566	74.74	-1833.83	0.99271	26	0.372078	0.516751	0.19006	0.269724	0.2939	0.2939	0	2.22257	High
TCGA_DK_A1A5	TCGA_DK_A1A5_01A	TCGA-DK-A1A5-01	8.31579	237	189.6	446.68	0.780615	37	0.346633	0.628325	0.242375	0.334308	0.3039	0.3039	1.02	2.72366	High
TCGA_DK_A1A6	TCGA_DK_A1A6_01A	TCGA-DK-A1A6-01	7.81579	NA	-688.3	764.414	0.744092	29	0.532323	0.637861	0.258949	0.326573	0.3055	0.3055	0.56	1.08056	High
TCGA_DK_A1A7	TCGA_DK_A1A7_01A	TCGA-DK-A1A7-01	7	218	-1268.6	1962.77	0.531286	49	0.461042	0.573799	0.189905	0.276559	0.3021	0.3021	0.96	0.549862	Low
TCGA_DK_A1AA	TCGA_DK_A1AA_01A	TCGA-DK-A1AA-01	2.55263	76	-1558.11	-254.062	0.897209	3	0.338445	0.572232	0.323375	0.441336	0.2842	0.2842	1.25	1.32531	High
TCGA_DK_A1AB	TCGA_DK_A1AB_01A	TCGA-DK-A1AB-01	6.36842	179	783.97	-268.81	0.896984	9	0.266442	0.623019	0.151069	0.233821	0.2863	0.2863	0	2.49351	High
TCGA_DK_A1AC	TCGA_DK_A1AC_01A	TCGA-DK-A1AC-01	49.5263	1299	-166.33	2319.77	0.53779	44	0.533227	0.690978	0.19405	0.273428	0.3059	0.3059	0.25	0.149364	Low
TCGA_DK_A1AD	TCGA_DK_A1AD_01A	TCGA-DK-A1AD-01	7.63158	223	-506.66	-719.099	0.944639	38	0.46569	0.785814	0.374123	0.476289	0.2888	0.2888	0.5	1.70933	High
TCGA_DK_A1AE	TCGA_DK_A1AE_01A	TCGA-DK-A1AE-01	3.92105	109	-1385.56	551.712	0.835685	16	0.543996	0.776457	0.250223	0.329671	0.2916	0.2916	0	1.1649	High
TCGA_DK_A1AF	TCGA_DK_A1AF_01A	TCGA-DK-A1AF-01	0.421053	102	1133.03	441.971	0.767831	3	0.22285	0.73646	0.147758	0.215469	0.2754	0.2754	0	1.68563	High
TCGA_DK_A1AG	TCGA_DK_A1AG_01A	TCGA-DK-A1AG-01	3.94737	111	-1930.77	401.685	0.872395	0	0.370547	0.591475	0.233029	0.319987	0.2822	0.2822	0.1	0.865533	Low
TCGA_DK_A2HX	TCGA_DK_A2HX_01A	TCGA-DK-A2HX-01	2.42105	97	891.09	-798.516	0.975247	24	0.208627	0.543303	0.15007	0.249069	0.3002	0.3002	0.03	2.91481	High
TCGA_DK_A2I1	TCGA_DK_A2I1_01A	TCGA-DK-A2I1-01	7.81579	713	666.56	1123.27	0.779322	21	0.347118	0.688712	0.295491	0.416998	0.2833	0.2833	0.25	1.21086	High
TCGA_DK_A2I2	TCGA_DK_A2I2_01A	TCGA-DK-A2I2-01	2.76316	406	76.39	1490.54	0.720812	32	0.420255	0.638622	0.144416	0.226683	0.307	0.307	0.01	2.24625	High
TCGA_DK_A2I4	TCGA_DK_A2I4_01A	TCGA-DK-A2I4-01	20.8684	807	1105.58	-1557.39	0.986102	25	0.329528	0.516596	0.145999	0.226249	0.2236	0.2236	0.19	1.48392	High
TCGA_DK_A2I6	TCGA_DK_A2I6_01A	TCGA-DK-A2I6-01	9	249	-1135.21	254.678	0.830873	54	0.497443	0.557738	0.216377	0.288985	0.312	0.312	0.04	3.10171	High
TCGA_DK_A3IK	TCGA_DK_A3IK_01A	TCGA-DK-A3IK-01	5.71053	196	-575.56	-588.785	0.905163	47	0.318053	0.405794	0.215606	0.316813	0.3076	0.3076	0.13	3.53201	High
TCGA_DK_A3IL	TCGA_DK_A3IL_01A	TCGA-DK-A3IL-01	5.78947	174	-882.87	-150.075	0.873605	22	0.389363	0.656804	0.185412	0.280593	0.3623	0.3623	0.11	2.69814	High
TCGA_DK_A3IM	TCGA_DK_A3IM_01A	TCGA-DK-A3IM-01	2.52632	76	-1878.02	-360.65	0.888614	60	0.566014	0.530401	0.167685	0.28515	0.3511	0.3511	0.47	1.1649	High
TCGA_DK_A3IN	TCGA_DK_A3IN_01A	TCGA-DK-A3IN-01	11.5789	354	366.25	-865.155	0.947801	25	0.363181	0.562802	0.263822	0.362475	0.3319	0.3319	0	2.20719	High
TCGA_DK_A3IQ	TCGA_DK_A3IQ_01A	TCGA-DK-A3IQ-01	4.55263	169	1732.71	-145.343	0.904343	26	0.0581383	0.54551	0.191319	0.290285	0.3002	0.3002	0.03	3.26058	High
TCGA_DK_A3IS	TCGA_DK_A3IS_01A	TCGA-DK-A3IS-01	11.1053	310	-2022.45	1919.24	0.513999	15	0.461937	0.657964	0.281978	0.3981	0.2659	0.2659	0.82	0.928711	Low
TCGA_DK_A3IT	TCGA_DK_A3IT_01A	TCGA-DK-A3IT-01	12.7632	398	-233.46	145.582	0.870592	23	0.411857	0.810362	0.204619	0.296569	0.3182	0.3182	0	2.10826	High
TCGA_DK_A3IU	TCGA_DK_A3IU_01A	TCGA-DK-A3IU-01	6.97368	356	781.36	-699.547	0.983	11	0.286893	0.565924	0.18804	0.273916	0.3433	0.3433	0	1.14672	High
TCGA_DK_A3IV	TCGA_DK_A3IV_01A	TCGA-DK-A3IV-01	2.07895	76	-1693.3	167.739	0.782566	29	0.486192	0.657168	0.210034	0.297114	0.337	0.337	0.09	1.69472	High
TCGA_DK_A3WW	TCGA_DK_A3WW_01A	TCGA-DK-A3WW-01	38.3684	1084	-658.15	-652.698	0.953413	5	0.470004	0.570771	0.207398	0.319009	0.3282	0.3282	0.22	0.776658	Low
TCGA_DK_A3WX	TCGA_DK_A3WX_01A	TCGA-DK-A3WX-01	1.26316	33	-28.83	-846.836	0.986252	14	0.442899	0.577958	0.168878	0.248371	0.3191	0.3191	0	1.48132	High
TCGA_DK_A3WY	TCGA_DK_A3WY_01A	TCGA-DK-A3WY-01	0.0526316	19	799.04	-528.673	0.973427	NA	0.423678	0.515787	0.103188	0.175424	0.3199	0.3199	0	1.00199	Low
TCGA_DK_A3X1	TCGA_DK_A3X1_01A	TCGA-DK-A3X1-01	27.3947	786	-710.69	-1154.31	0.971638	40	0.461549	0.801078	0.228365	0.322349	0.3336	0.3336	0.02	0.0781689	Low
TCGA_DK_A3X2	TCGA_DK_A3X2_01A	TCGA-DK-A3X2-01	3.47368	122	-1918.78	-127.226	0.916701	29	0.567655	0.401742	0.225749	0.362588	0.3177	0.3177	0.77	0.208086	Low
TCGA_DK_A6AV	TCGA_DK_A6AV_01A	TCGA-DK-A6AV-01	3.76316	104	-1187.63	-1692.76	0.99995	35	0.470515	0.645133	0.236721	0.340615	0.3242	0.3242	0.03	1.22806	High
TCGA_DK_A6AW	TCGA_DK_A6AW_01A	TCGA-DK-A6AW-01	130	3552	-1280.54	-63.3743	0.847157	3	0.322517	0.544988	0.228428	0.345357	0.3077	0.3077	0.18	0.635569	Low
TCGA_DK_A6B0	TCGA_DK_A6B0_01A	TCGA-DK-A6B0-01	0.815789	24	-1970.6	-839.038	0.965156	1	0.387693	0.458632	0.178588	0.295431	0.3166	0.3166	0.01	0.288772	Low
TCGA_DK_A6B1	TCGA_DK_A6B1_01A	TCGA-DK-A6B1-01	4.31579	126	-1378.35	-852.008	0.964338	14	0.407352	0.494024	0.199026	0.285652	0.3087	0.3087	0.15	1.27688	High
TCGA_DK_A6B2	TCGA_DK_A6B2_01A	TCGA-DK-A6B2-01	5.89474	172	517.36	-218.813	0.942466	38	NA	NA	NA	NA	0.3143	0.3143	0.16	1.39079	High
TCGA_DK_A6B5	TCGA_DK_A6B5_01A	TCGA-DK-A6B5-01	4.02632	117	-1104.81	-863.13	0.962903	45	0.406879	0.667983	0.289608	0.411471	0.3449	0.3449	0.06	2.70973	High
TCGA_DK_A6B6	TCGA_DK_A6B6_01A	TCGA-DK-A6B6-01	32.8947	801	-1578.01	-264.348	0.82983	28	0.501937	0.518284	0.168129	0.255347	0.3121	0.3121	0.05	0.323562	Low
TCGA_DK_AA6L	TCGA_DK_AA6L_01A	TCGA-DK-AA6L-01	12	383	-1118.08	898.15	0.782338	45	0.412335	0.63269	0.263112	0.36951	0.3309	0.3309	0.02	1.19885	High
TCGA_DK_AA6M	TCGA_DK_AA6M_01A	TCGA-DK-AA6M-01	2.21053	61	-194.29	-117.307	0.90018	14	0.376568	0.590991	0.181225	0.264967	0.3293	0.3293	0.03	3.07002	High
TCGA_DK_AA6P	TCGA_DK_AA6P_01A	TCGA-DK-AA6P-01	4.28947	173	-1716.3	-408.519	0.964392	58	0.507853	0.595236	0.204179	0.298905	0.3319	0.3319	0.48	0.219728	Low
TCGA_DK_AA6Q	TCGA_DK_AA6Q_01A	TCGA-DK-AA6Q-01	3.76316	114	-1719.28	-837.33	0.975919	26	0.465214	0.821454	0.233771	0.302992	0.3192	0.3192	0.05	0.34489	Low
TCGA_DK_AA6R	TCGA_DK_AA6R_01A	TCGA-DK-AA6R-01	9.89474	333	-1108.53	-906.576	0.978973	62	0.460677	0.806928	0.1862	0.297604	0.3337	0.3337	0.05	2.69871	High
TCGA_DK_AA6S	TCGA_DK_AA6S_01A	TCGA-DK-AA6S-01	17.7105	532	669.34	-800.21	0.972185	28	0.254967	0.494192	0.213513	0.296879	0.3274	0.3274	0	0.711476	Low
TCGA_DK_AA6T	TCGA_DK_AA6T_01A	TCGA-DK-AA6T-01	2.15789	85	-319.7	-877.885	0.977652	14	0.597195	0.499328	0.204937	0.303387	0.3211	0.3211	0	0.172041	Low
TCGA_DK_AA6U	TCGA_DK_AA6U_01A	TCGA-DK-AA6U-01	12	419	-2006.83	-246.74	0.94237	30	0.511693	0.713127	0.263975	0.357433	0.3194	0.3194	0.03	3.2782	High
TCGA_DK_AA6W	TCGA_DK_AA6W_01A	TCGA-DK-AA6W-01	8.02632	233	-1345.75	-749.225	0.971139	51	0.565285	0.731119	0.308536	0.36659	0.33	0.33	0.13	2.56151	High
TCGA_DK_AA6X	TCGA_DK_AA6X_01A	TCGA-DK-AA6X-01	3.02632	110	-761.7	-496.08	0.903321	17	0.397394	0.548268	0.161447	0.250701	0.3316	0.3316	0	1.41534	High
TCGA_DK_AA71	TCGA_DK_AA71_01A	TCGA-DK-AA71-01	21.3947	599	-1449.43	-918.063	0.963675	13	0.449931	0.70869	0.201148	0.313584	0.3431	0.3431	0.03	1.03859	High
TCGA_DK_AA74	TCGA_DK_AA74_01A	TCGA-DK-AA74-01	3.78947	219	1350.68	-931.527	0.97535	31	0.286191	0.680354	0.176025	0.262804	0.3308	0.3308	0	0.839025	Low
TCGA_DK_AA75	TCGA_DK_AA75_01A	TCGA-DK-AA75-01	15.5789	418	-2054.04	24.6716	0.913992	NA	0.567124	0.653489	0.375927	0.483326	0.3282	0.3282	0.16	0.112305	Low
TCGA_DK_AA76	TCGA_DK_AA76_01A	TCGA-DK-AA76-01	7.60526	227	-1912.16	111.938	0.867997	33	0.497258	0.644507	0.281377	0.373582	0.3349	0.3349	0.13	1.62893	High
TCGA_DK_AA77	TCGA_DK_AA77_01A	TCGA-DK-AA77-01	12.0789	320	-1609.62	637.443	0.72934	22	0.457593	0.67347	0.274005	0.387188	0.3357	0.3357	0.13	1.10729	High
TCGA_E5_A2PC	TCGA_E5_A2PC_01A	TCGA-E5-A2PC-01	7.65789	207	-1735.35	-474.612	0.962061	22	0.44729	0.677436	0.293427	0.415363	0.3096	0.3096	0.05	1.00053	Low
TCGA_E5_A4TZ	TCGA_E5_A4TZ_01A	TCGA-E5-A4TZ-01	12.6053	421	-2115.44	-140.917	0.890074	48	0.531491	0.61974	0.333112	0.462691	0.3413	0.3413	1.01	1.54668	High
TCGA_E5_A4U1	TCGA_E5_A4U1_01A	TCGA-E5-A4U1-01	17.2368	555	-2151.6	1331.36	0.66921	30	0.514311	0.543989	0.261598	0.383198	0.3324	0.3324	0.28	2.15117	High
TCGA_E7_A3X6	TCGA_E7_A3X6_01A	TCGA-E7-A3X6-01	3.34211	108	-785.84	-497.401	0.970901	23	0.392361	0.637307	0.264103	0.353033	0.3159	0.3159	0	0.420261	Low
TCGA_E7_A3Y1	TCGA_E7_A3Y1_01A	TCGA-E7-A3Y1-01	4.42105	152	-1370.06	-988.28	0.984199	9	0.356454	0.499184	0.261758	0.368214	0.3125	0.3125	0.07	0.213236	Low
TCGA_E7_A4IJ	TCGA_E7_A4IJ_01A	TCGA-E7-A4IJ-01	10	305	-1560.28	59.9034	0.726091	55	0.463539	0.65707	0.224552	0.32507	0.3251	0.3251	0.05	0.158942	Low
TCGA_E7_A4XJ	TCGA_E7_A4XJ_01A	TCGA-E7-A4XJ-01	1.44737	39	-1474.48	1142.22	0.645807	3	0.400129	0.629988	0.176984	0.255488	0.3217	0.3217	0.05	0.581622	Low
TCGA_E7_A519	TCGA_E7_A519_01A	TCGA-E7-A519-01	2.44737	67	-1039.13	1163.32	0.784412	3	0.366276	0.448775	0.1285	0.211248	0.3046	0.3046	0	0.56595	Low
TCGA_E7_A541	TCGA_E7_A541_01A	TCGA-E7-A541-01	6.92105	425	-1027.04	-197.522	0.869662	33	0.424835	0.620898	0.161917	0.238323	0.3155	0.3155	0.02	0.545268	Low
TCGA_E7_A5KE	TCGA_E7_A5KE_01A	TCGA-E7-A5KE-01	7.07895	171	-2197.93	-694.477	0.905543	31	0.480105	0.582601	0.355436	0.477058	0.328	0.328	0.5	0.491886	Low
TCGA_E7_A5KF	TCGA_E7_A5KF_01A	TCGA-E7-A5KF-01	6.94737	173	-2469.52	-1301.29	0.97611	10	0.460216	0.515714	0.217375	0.34427	0.3095	0.3095	0.03	0.625294	Low
TCGA_E7_A677	TCGA_E7_A677_01A	TCGA-E7-A677-01	7.34211	215	-1199.62	-560.984	0.932357	11	0.311056	0.558243	0.248742	0.356855	0.3003	0.3003	0.06	1.66547	High
TCGA_E7_A678	TCGA_E7_A678_01A	TCGA-E7-A678-01	1.68421	46	-2066.19	1438.17	0.685878	0	0.411947	0.504302	0.288314	0.415119	0.3072	0.3072	0.04	0.286831	Low
TCGA_E7_A6MD	TCGA_E7_A6MD_01A	TCGA-E7-A6MD-01	14.7632	405	-96.42	-507.709	0.896495	29	0.326012	0.588269	0.248743	0.357736	0.3281	0.3281	0.01	1.58918	High
TCGA_E7_A6ME	TCGA_E7_A6ME_01A	TCGA-E7-A6ME-01	4.23684	123	-1801.1	147.83	0.912412	22	0.507766	0.630952	0.214752	0.307893	0.3346	0.3346	0.18	0.288765	Low
TCGA_E7_A6MF	TCGA_E7_A6MF_01A	TCGA-E7-A6MF-01	1.5	41	-1940.47	-151.88	0.815768	0	0.33616	0.396533	0.234068	0.336174	0.3302	0.3302	0	0.764263	Low
TCGA_E7_A7DU	TCGA_E7_A7DU_01A	TCGA-E7-A7DU-01	8.34211	249	-1712.72	297.135	0.758142	7	0.388151	0.62191	0.298171	0.421767	0.3325	0.3325	0	0.648014	Low
TCGA_E7_A7DV	TCGA_E7_A7DV_01A	TCGA-E7-A7DV-01	8.44737	493	489.03	-255.359	0.94722	47	0.382429	0.742779	0.255962	0.31499	0.3199	0.3199	0.02	1.75986	High
TCGA_E7_A7PW	TCGA_E7_A7PW_01A	TCGA-E7-A7PW-01	2.5	77	-2089.25	254.654	0.923802	38	0.495105	0.682838	0.2019	0.302246	0.3332	0.3332	0.16	0.297467	Low
TCGA_E7_A7XN	TCGA_E7_A7XN_01A	TCGA-E7-A7XN-01	26.7632	867	-1131.17	371.718	0.810586	8	0.492193	0.675964	0.201997	0.29194	0.3247	0.3247	0	1.57153	High
TCGA_E7_A85H	TCGA_E7_A85H_01A	TCGA-E7-A85H-01	13.1053	386	-723.72	1329.8	0.630151	74	0.5255	0.554404	0.120722	0.193142	0.3438	0.3438	0.32	0.932902	Low
TCGA_E7_A8O7	TCGA_E7_A8O7_01A	TCGA-E7-A8O7-01	0.973684	26	-1475.17	-515.139	0.891049	9	0.34749	0.514326	0.202321	0.307879	0.3141	0.3141	0.02	0.877546	Low
TCGA_E7_A97P	TCGA_E7_A97P_01A	TCGA-E7-A97P-01	6.18421	193	-112.99	265.411	0.843093	12	0.353305	0.70786	0.207509	0.300776	0.3186	0.3186	0	1.06148	High
TCGA_E7_A97Q	TCGA_E7_A97Q_01A	TCGA-E7-A97Q-01	2.05263	63	-202.36	-731.105	0.921349	40	0.259707	0.53375	0.326794	0.436337	0.3288	0.3288	0.01	2.43621	High
TCGA_FD_A3B3	TCGA_FD_A3B3_01A	TCGA-FD-A3B3-01	2.60526	164	586.2	718.923	0.757721	11	0.404649	0.560535	0.196122	0.286472	0.298	0.298	0	1.21086	High
TCGA_FD_A3B4	TCGA_FD_A3B4_01A	TCGA-FD-A3B4-01	2.34211	72	17.86	22.9764	0.900564	31	0.334247	0.529108	0.145312	0.218358	0.3016	0.3016	0	2.35377	High
TCGA_FD_A3B5	TCGA_FD_A3B5_01A	TCGA-FD-A3B5-01	4.21053	142	-927.78	-655.307	0.978547	47	0.364456	0.561716	0.251128	0.381647	0.3672	0.3672	0.38	1.04137	High
TCGA_FD_A3B6	TCGA_FD_A3B6_01A	TCGA-FD-A3B6-01	7.63158	257	-392.68	-593.593	0.936841	32	0.50485	0.590294	0.239376	0.322774	0.342	0.342	0.02	0.571183	Low
TCGA_FD_A3B7	TCGA_FD_A3B7_01A	TCGA-FD-A3B7-01	1.52632	67	1219.19	-294.956	0.922308	28	0.376776	0.568949	0.171199	0.242758	0.3411	0.3411	0	1.68563	High
TCGA_FD_A3B8	TCGA_FD_A3B8_01A	TCGA-FD-A3B8-01	0.131579	38	1572.74	-181.408	0.860873	NA	0.248733	0.524144	0.129735	0.197107	0.3357	0.3357	0	1.56308	High
TCGA_FD_A3N5	TCGA_FD_A3N5_01A	TCGA-FD-A3N5-01	10.6842	278	-1091.76	106.539	0.806263	33	0.458669	0.695449	0.214218	0.303784	0.2433	0.2433	4.96	3.49592	High
TCGA_FD_A3N6	TCGA_FD_A3N6_01A	TCGA-FD-A3N6-01	3.52632	111	-1221.33	-99.6955	0.813363	9	0.472199	0.625697	0.293955	0.433925	0.229	0.229	7.81	1.49551	High
TCGA_FD_A3NA	TCGA_FD_A3NA_01A	TCGA-FD-A3NA-01	5.23684	168	-528.43	-65.1633	0.875256	27	0.431407	0.844584	0.224722	0.325062	0.3275	0.3275	0.21	2.33822	High
TCGA_FD_A3SJ	TCGA_FD_A3SJ_01A	TCGA-FD-A3SJ-01	7.23684	221	-410.81	439.255	0.838626	55	0.462566	0.739294	0.20423	0.302766	0.3309	0.3309	0.01	2.67508	High
TCGA_FD_A3SL	TCGA_FD_A3SL_01A	TCGA-FD-A3SL-01	7.31579	204	1030.57	-598.817	0.945011	44	0.251922	0.800511	0.159158	0.239047	0.3359	0.3359	0.02	4.22465	High
TCGA_FD_A3SM	TCGA_FD_A3SM_01A	TCGA-FD-A3SM-01	6.15789	186	36.13	-389.186	0.946737	7	0.301741	0.606435	0.277042	0.376265	0.3142	0.3142	0	3.31888	High
TCGA_FD_A3SN	TCGA_FD_A3SN_01A	TCGA-FD-A3SN-01	13.1053	339	-479.51	454.427	0.704719	37	0.413025	0.5499	0.241486	0.363166	0.3376	0.3376	0.15	1.72068	High
TCGA_FD_A3SO	TCGA_FD_A3SO_01A	TCGA-FD-A3SO-01	11.2105	323	273.39	356.99	0.804442	18	0.456674	0.685046	0.145528	0.238128	0.331	0.331	0	2.23458	High
TCGA_FD_A3SP	TCGA_FD_A3SP_01A	TCGA-FD-A3SP-01	2.81579	107	1610.83	-200.856	0.877046	19	0.224558	0.529136	0.194702	0.285309	0.3293	0.3293	0	1.14672	High
TCGA_FD_A3SQ	TCGA_FD_A3SQ_01A	TCGA-FD-A3SQ-01	2.10526	68	707.91	-836.951	0.959368	18	0.181786	0.716758	0.179708	0.273447	0.3375	0.3375	0	6.23146	High
TCGA_FD_A3SR	TCGA_FD_A3SR_01A	TCGA-FD-A3SR-01	3.86842	133	272.6	1080.45	0.602574	45	0.361149	0.566275	0.177499	0.269519	0.3293	0.3293	0.07	1.07677	High
TCGA_FD_A3SS	TCGA_FD_A3SS_01A	TCGA-FD-A3SS-01	12.2895	442	-1115.02	-301.761	0.959437	34	0.373664	0.659265	0.179011	0.273906	0.3313	0.3313	0	0.396113	Low
TCGA_FD_A43N	TCGA_FD_A43N_01A	TCGA-FD-A43N-01	5	166	-185.82	1402.9	0.68283	39	0.312284	0.594393	0.355398	0.461182	0.2928	0.2928	0.05	0.332329	Low
TCGA_FD_A43P	TCGA_FD_A43P_01A	TCGA-FD-A43P-01	11.0789	374	-503.7	-768.983	0.981355	39	0.507263	0.724765	0.160706	0.25039	0.3277	0.3277	0.02	1.14954	High
TCGA_FD_A43S	TCGA_FD_A43S_01A	TCGA-FD-A43S-01	0.0526316	NA	726.29	-227.69	0.765293	0	0.236366	0.482672	0.136181	0.206555	0.3095	0.3095	0	0.286629	Low
TCGA_FD_A43U	TCGA_FD_A43U_01A	TCGA-FD-A43U-01	1.18421	62	946.37	-1289.46	0.99352	34	0.286364	0.532561	0.191648	0.274925	0.3	0.3	0.05	1.08575	High
TCGA_FD_A43X	TCGA_FD_A43X_01A	TCGA-FD-A43X-01	10.4211	288	-1928.07	816.278	0.789042	13	0.39458	0.514907	0.276507	0.423881	0.3112	0.3112	0.02	0.685401	Low
TCGA_FD_A43Y	TCGA_FD_A43Y_01A	TCGA-FD-A43Y-01	1.86842	57	-81.83	593.188	0.70599	38	0.361926	0.602111	0.199005	0.295545	0.3318	0.3318	0	1.7401	High
TCGA_FD_A5BR	TCGA_FD_A5BR_01A	TCGA-FD-A5BR-01	2.26316	87	-327.05	1064.81	0.714043	27	0.297172	0.655586	0.237235	0.337728	0.2946	0.2946	0	1.2354	High
TCGA_FD_A5BS	TCGA_FD_A5BS_01A	TCGA-FD-A5BS-01	0.131579	23	1619.51	2245.81	0.45847	1	0.302144	0.527661	0.18602	0.267802	0.3319	0.3319	0	0.737328	Low
TCGA_FD_A5BT	TCGA_FD_A5BT_01A	TCGA-FD-A5BT-01	2.28947	110	1459.43	-525.972	0.932596	19	0.270822	0.684176	0.129486	0.202957	0.2999	0.2999	0.03	0.839025	Low
TCGA_FD_A5BU	TCGA_FD_A5BU_01A	TCGA-FD-A5BU-01	2.07895	70	342.16	-529.274	0.903282	23	0.335118	0.516124	0.17158	0.249827	0.3213	0.3213	0.05	2.72916	High
TCGA_FD_A5BV	TCGA_FD_A5BV_01A	TCGA-FD-A5BV-01	3.60526	111	-1245.67	723.835	0.798149	33	0.371533	0.708364	0.265368	0.368545	0.3158	0.3158	0.16	2.29117	High
TCGA_FD_A5BX	TCGA_FD_A5BX_01A	TCGA-FD-A5BX-01	11.0263	322	677.38	-697.699	0.93151	8	0.239479	0.534704	0.194874	0.259023	0.3172	0.3172	0	2.09504	High
TCGA_FD_A5BY	TCGA_FD_A5BY_01A	TCGA-FD-A5BY-01	1.52632	44	-396.73	-994.281	0.981716	41	0.40542	0.523903	0.216104	0.326625	0.3094	0.3094	0.14	2.10826	High
TCGA_FD_A5BZ	TCGA_FD_A5BZ_01A	TCGA-FD-A5BZ-01	3.81579	108	954.04	492.731	0.744035	24	0.201096	0.814088	0.242811	0.342094	0.3006	0.3006	0.01	3.97314	High
TCGA_FD_A5C0	TCGA_FD_A5C0_01A	TCGA-FD-A5C0-01	4.28947	112	-631.6	-133.712	0.671287	32	0.394851	0.652996	0.170041	0.253488	0.3211	0.3211	0.06	1.10729	High
TCGA_FD_A5C1	TCGA_FD_A5C1_01A	TCGA-FD-A5C1-01	3.47368	132	504.37	-485.352	0.968872	30	0.366823	0.669588	0.217247	0.305757	0.32	0.32	0	2.22056	High
TCGA_FD_A62N	TCGA_FD_A62N_01A	TCGA-FD-A62N-01	2.34211	84	1246.86	-36.3988	0.842031	33	0.349409	0.548982	0.152328	0.227938	0.3062	0.3062	0	1.38953	High
TCGA_FD_A62O	TCGA_FD_A62O_01A	TCGA-FD-A62O-01	6.07895	165	-974.63	-79.4346	0.859283	20	0.361184	0.526797	0.222434	0.323068	0.3186	0.3186	0.2	1.26591	High
TCGA_FD_A62P	TCGA_FD_A62P_01A	TCGA-FD-A62P-01	8.31579	361	-44.39	2262.4	0.497287	46	0.383463	0.799548	0.194542	0.278807	0.3055	0.3055	0	2.51707	High
TCGA_FD_A62S	TCGA_FD_A62S_01A	TCGA-FD-A62S-01	2.02632	71	1131.04	632.064	0.895895	23	0.269562	0.628252	0.247279	0.332671	0.3156	0.3156	0.05	1.33274	High
TCGA_FD_A6TA	TCGA_FD_A6TA_01A	TCGA-FD-A6TA-01	7.94737	252	393.09	1440.09	0.746438	21	0.32661	0.643288	0.313298	0.430089	0.3124	0.3124	0	1.48565	High
TCGA_FD_A6TB	TCGA_FD_A6TB_01A	TCGA-FD-A6TB-01	4.76316	185	387.05	854.856	0.745529	19	0.328893	0.664523	0.178913	0.259263	0.3075	0.3075	0.01	1.47548	High
TCGA_FD_A6TC	TCGA_FD_A6TC_01A	TCGA-FD-A6TC-01	30.6579	866	157.74	2633.06	0.449863	45	0.323465	0.60732	0.269915	0.385252	0.3311	0.3311	0.29	2.91481	High
TCGA_FD_A6TD	TCGA_FD_A6TD_01A	TCGA-FD-A6TD-01	4.15789	121	111.99	-401.409	0.903163	29	0.377693	0.611395	0.222677	0.309797	0.3279	0.3279	0.03	2.71136	High
TCGA_FD_A6TE	TCGA_FD_A6TE_01A	TCGA-FD-A6TE-01	7.68421	254	-2067.01	-866.959	0.975566	32	0.436924	0.63967	0.184916	0.282807	0.3385	0.3385	0.34	0.288772	Low
TCGA_FD_A6TF	TCGA_FD_A6TF_01A	TCGA-FD-A6TF-01	3.92105	130	302.93	-1287.31	0.989601	41	0.338192	0.639033	0.173426	0.256156	0.3282	0.3282	0	2.39206	High
TCGA_FD_A6TG	TCGA_FD_A6TG_01A	TCGA-FD-A6TG-01	8.18421	361	404.89	-181.635	0.917755	32	0.350069	0.706616	0.257274	0.352143	0.3202	0.3202	0.02	1.02679	High
TCGA_FD_A6TH	TCGA_FD_A6TH_01A	TCGA-FD-A6TH-01	5.02632	147	-114.42	-741.857	0.951048	37	0.397189	0.55195	0.242876	0.340168	0.3428	0.3428	0.24	2.94005	High
TCGA_FD_A6TI	TCGA_FD_A6TI_01A	TCGA-FD-A6TI-01	3.94737	116	-908.32	-225.135	0.834011	7	0.249229	0.673591	0.243719	0.34467	0.3203	0.3203	0	1.13511	High
TCGA_FD_A6TK	TCGA_FD_A6TK_01A	TCGA-FD-A6TK-01	2.65789	113	773.59	-676.638	0.973643	42	0.3132	0.676279	0.207596	0.289277	0.3159	0.3159	0	1.31711	High
TCGA_FJ_A3Z7	TCGA_FJ_A3Z7_01A	TCGA-FJ-A3Z7-01	9.68421	298	43.3	-415.104	0.953565	48	0.26974	0.550996	0.159178	0.240113	0.3483	0.3483	0.25	0.211282	Low
TCGA_FJ_A3Z9	TCGA_FJ_A3Z9_01A	TCGA-FJ-A3Z9-01	2.31579	66	-2025.73	-351.066	0.921572	4	0.393239	0.529652	0.327239	0.461942	0.2779	0.2779	0.09	1.97944	High
TCGA_FJ_A3ZE	TCGA_FJ_A3ZE_01A	TCGA-FJ-A3ZE-01	13.8947	375	-2127.27	2275.43	0.522765	32	0.432126	0.503944	0.243061	0.352438	0.356	0.356	0.25	0.335402	Low
TCGA_FJ_A3ZF	TCGA_FJ_A3ZF_01A	TCGA-FJ-A3ZF-01	8.10526	227	-1846.29	798.65	0.742318	33	0.529258	0.624081	0.354887	0.452666	0.334	0.334	0.33	0.700006	Low
TCGA_FJ_A871	TCGA_FJ_A871_01A	TCGA-FJ-A871-01	1.76316	45	-960.72	-715.888	0.95473	8	0.377658	0.595936	0.163859	0.229948	0.3077	0.3077	0.09	2.15117	High
TCGA_FT_A3EE	TCGA_FT_A3EE_01A	TCGA-FT-A3EE-01	4	118	-1215.1	667.882	0.714421	23	0.378312	0.664885	0.23317	0.311406	0.3404	0.3404	0.06	1.87419	High
TCGA_FT_A61P	TCGA_FT_A61P_01A	TCGA-FT-A61P-01	4.34211	146	602.54	312.113	0.88119	22	0.335033	0.513833	0.188536	0.275431	0.308	0.308	0	2.72366	High
TCGA_G2_A2EC	TCGA_G2_A2EC_01A	TCGA-G2-A2EC-01	5.07895	166	184.79	196.531	0.918929	NA	0.206178	0.485473	0.181925	0.285069	0.3259	0.3259	0	0.833972	Low
TCGA_G2_A2EF	TCGA_G2_A2EF_01A	TCGA-G2-A2EF-01	8.07895	239	-791.27	281.517	0.883706	40	0.398724	0.408529	0.230165	0.316646	0.3043	0.3043	0.08	0.325751	Low
TCGA_G2_A2EJ	TCGA_G2_A2EJ_01A	TCGA-G2-A2EJ-01	10.2105	540	-1480.39	1041.67	0.742981	20	0.482449	0.747454	0.189336	0.319217	0.29	0.29	0.07	2.71697	High
TCGA_G2_A2EK	TCGA_G2_A2EK_01A	TCGA-G2-A2EK-01	1.97368	65	-1063.83	668.16	0.700627	21	0.339491	0.601977	0.238763	0.350899	0.2933	0.2933	0	0.79647	Low
TCGA_G2_A2EL	TCGA_G2_A2EL_01A	TCGA-G2-A2EL-01	8.07895	210	-2084.08	-1156.63	0.982123	19	0.652576	0.331565	0.371619	0.499871	0.3067	0.3067	0.25	0.253287	Low
TCGA_G2_A2EO	TCGA_G2_A2EO_01A	TCGA-G2-A2EO-01	28.0263	821	254.87	522.139	0.904531	11	0.421961	0.77126	0.18078	0.26254	0.3175	0.3175	0	1.21086	High
TCGA_G2_A2ES	TCGA_G2_A2ES_01A	TCGA-G2-A2ES-01	15.7105	414	-233.55	-268.907	0.91657	16	0.497938	0.692339	0.212037	0.298996	0.298	0.298	0.13	2.21411	High
TCGA_G2_A3IB	TCGA_G2_A3IB_01A	TCGA-G2-A3IB-01	3.07895	86	-1609.51	513.857	0.714433	16	0.456032	0.814042	0.389951	0.527015	0.3417	0.3417	0.3	1.54668	High
TCGA_G2_A3IE	TCGA_G2_A3IE_01A	TCGA-G2-A3IE-01	11.3158	336	-1457.24	1432.76	0.571752	41	0.390189	0.511396	0.224849	0.343691	0.3344	0.3344	0.11	0.502565	Low
TCGA_G2_A3VY	TCGA_G2_A3VY_01A	TCGA-G2-A3VY-01	22.4474	668	-2100.49	1928.3	0.573445	59	0.453453	0.611598	0.246784	0.349981	0.3366	0.3366	0.46	1.41534	High
TCGA_G2_AA3B	TCGA_G2_AA3B_01A	TCGA-G2-AA3B-01	19.8684	661	-1955	161.23	0.732357	65	0.492166	0.621476	0.266079	0.363471	0.3217	0.3217	0.31	0.0735732	Low
TCGA_G2_AA3C	TCGA_G2_AA3C_01A	TCGA-G2-AA3C-01	7.71053	221	-72.54	1667.65	0.692299	10	0.432342	0.576832	0.246863	0.329979	0.3241	0.3241	0	2.36253	High
TCGA_G2_AA3D	TCGA_G2_AA3D_01A	TCGA-G2-AA3D-01	3.36842	242	-2247.11	-1147.87	0.977203	29	0.46592	0.676544	0.135757	0.201435	0.3279	0.3279	0	1.36757	High
TCGA_G2_AA3F	TCGA_G2_AA3F_01A	TCGA-G2-AA3F-01	4.26316	131	-1237.09	300.22	0.768678	24	0.475528	0.636452	0.225452	0.309113	0.327	0.327	0.07	0.579927	Low
TCGA_GC_A3BM	TCGA_GC_A3BM_01A	TCGA-GC-A3BM-01	3.94737	116	-1659.03	-574.445	0.862817	21	0.410736	0.510419	0.250809	0.376518	0.3198	0.3198	0.21	1.11582	High
TCGA_GC_A3I6	TCGA_GC_A3I6_01A	TCGA-GC-A3I6-01	5.81579	172	-686.75	-747.058	0.977332	8	0.403244	0.657119	0.175827	0.280162	0.3448	0.3448	0.02	2.24173	High
TCGA_GC_A3OO	TCGA_GC_A3OO_01A	TCGA-GC-A3OO-01	2	117	-197.37	-676.726	0.950782	7	0.338932	0.78544	0.157273	0.241502	0.3191	0.3191	0	1.62444	High
TCGA_GC_A3RB	TCGA_GC_A3RB_01A	TCGA-GC-A3RB-01	5	154	-1481.84	545.185	0.624073	56	0.573067	0.879516	0.281795	0.386088	0.323	0.323	0.07	1.1784	High
TCGA_GC_A3RC	TCGA_GC_A3RC_01A	TCGA-GC-A3RC-01	12.3158	312	-494.39	238.511	0.861602	41	0.451138	0.539589	0.151356	0.227795	0.3332	0.3332	0	1.20874	High
TCGA_GC_A3RD	TCGA_GC_A3RD_01A	TCGA-GC-A3RD-01	2.55263	75	-1329.07	1279.32	0.607497	44	0.427435	0.635512	0.229045	0.33891	0.3513	0.3513	0.33	1.4483	High
TCGA_GC_A3WC	TCGA_GC_A3WC_01A	TCGA-GC-A3WC-01	4.76316	138	-331.66	-651.06	0.954196	21	0.434102	0.788175	0.162361	0.229139	0.3029	0.3029	0.02	1.11582	High
TCGA_GC_A3YS	TCGA_GC_A3YS_01A	TCGA-GC-A3YS-01	7.42105	218	330.62	1921.17	0.463442	59	0.354946	0.527397	0.191568	0.290785	0.3571	0.3571	0.23	3.49592	High
TCGA_GC_A4ZW	TCGA_GC_A4ZW_01A	TCGA-GC-A4ZW-01	18.6842	621	-1877.11	1535.64	0.622424	61	0.505273	0.489993	0.149787	0.233699	0.2993	0.2993	0.05	1.04759	High
TCGA_GC_A6I1	TCGA_GC_A6I1_01A	TCGA-GC-A6I1-01	6.94737	212	-343.16	-1136.4	0.988997	44	0.454876	0.553914	0.255757	0.353502	0.3267	0.3267	0	0.730996	Low
TCGA_GC_A6I3	TCGA_GC_A6I3_01A	TCGA-GC-A6I3-01	5.94737	205	-430.11	319.861	0.747249	40	0.49394	0.677087	0.204518	0.285077	0.3265	0.3265	0	1.11582	High
TCGA_GD_A2C5	TCGA_GD_A2C5_01A	TCGA-GD-A2C5-01	8.21053	260	-336.34	-1323.81	0.990377	47	0.39257	0.658385	0.250471	0.358329	0.2946	0.2946	0.16	1.11582	High
TCGA_GD_A3OP	TCGA_GD_A3OP_01A	TCGA-GD-A3OP-01	3.76316	336	-82.7	20.0052	0.92876	11	0.26636	0.545196	0.160849	0.234892	0.3359	0.3359	0	1.11582	High
TCGA_GD_A3OQ	TCGA_GD_A3OQ_01A	TCGA-GD-A3OQ-01	2.47368	107	-1303.94	30.8987	0.933472	8	0.363257	0.646423	0.239999	0.371746	0.3291	0.3291	0.08	1.11582	High
TCGA_GD_A3OS	TCGA_GD_A3OS_01A	TCGA-GD-A3OS-01	2.92105	85	-534.67	-629.201	0.978096	41	0.307555	0.546476	0.206979	0.300497	0.3603	0.3603	0.09	3.2782	High
TCGA_GD_A6C6	TCGA_GD_A6C6_01A	TCGA-GD-A6C6-01	9.42105	232	-1256.83	61.98	0.848101	47	0.567285	0.608282	0.208913	0.277072	0.3525	0.3525	1.24	0.174626	Low
TCGA_GU_A42P	TCGA_GU_A42P_01A	TCGA-GU-A42P-01	6.71053	217	-1959.21	370.274	0.754062	29	0.44296	0.493228	0.326969	0.460191	0.3554	0.3554	0.33	1.11391	High
TCGA_GU_A42Q	TCGA_GU_A42Q_01A	TCGA-GU-A42Q-01	5.55263	166	-1551.53	-1342.55	0.995579	34	0.456081	0.671686	0.163774	0.249069	0.3256	0.3256	0	1.97416	High
TCGA_GU_A42R	TCGA_GU_A42R_01A	TCGA-GU-A42R-01	5.78947	130	-1699.95	232.418	0.870565	26	0.36145	0.529257	0.139522	0.244	0.3418	0.3418	0.31	0.835186	Low
TCGA_GU_A762	TCGA_GU_A762_01A	TCGA-GU-A762-01	3	107	293.84	521.738	0.84073	44	0.407552	0.735205	0.18846	0.278453	0.3248	0.3248	0	1.56308	High
TCGA_GU_A763	TCGA_GU_A763_01A	TCGA-GU-A763-01	1.89474	58	-2161.32	1559.31	0.681135	4	0.511754	0.589497	0.310251	0.429479	0.3114	0.3114	0	0.114504	Low
TCGA_GU_A764	TCGA_GU_A764_01A	TCGA-GU-A764-01	2.15789	116	103.84	-617.829	0.952533	49	0.333794	0.639318	0.235647	0.314469	0.3302	0.3302	0	2.18122	High
TCGA_GU_A766	TCGA_GU_A766_01A	TCGA-GU-A766-01	5.52632	169	61.36	-96.7753	0.932739	24	0.446686	0.557119	0.165644	0.24367	0.3425	0.3425	0.02	2.4979	High
TCGA_GU_A767	TCGA_GU_A767_01A	TCGA-GU-A767-01	8.10526	367	-537.44	-844.205	0.963887	58	0.398305	0.857329	0.16056	0.240663	0.3258	0.3258	0	2.85307	High
TCGA_GU_AATO	TCGA_GU_AATO_01A	TCGA-GU-AATO-01	8.97368	293	-276.37	703.049	0.843696	25	0.366116	0.714453	0.161933	0.246356	0.3243	0.3243	0.05	2.72366	High
TCGA_GU_AATP	TCGA_GU_AATP_01A	TCGA-GU-AATP-01	9.57895	300	422.81	-195.772	0.92926	18	0.303742	0.61564	0.211249	0.332457	0.3245	0.3245	0.1	2.55288	High
TCGA_GU_AATQ	TCGA_GU_AATQ_01A	TCGA-GU-AATQ-01	5.36842	148	-1320.09	552.452	0.858576	37	0.457835	0.808085	0.310133	0.429704	0.339	0.339	0.1	3.31888	High
TCGA_GV_A3JV	TCGA_GV_A3JV_01A	TCGA-GV-A3JV-01	3.44737	111	-286.62	1426.91	0.662829	11	0.371525	0.62502	0.199022	0.293132	0.3362	0.3362	0.04	0.510902	Low
TCGA_GV_A3JW	TCGA_GV_A3JW_01A	TCGA-GV-A3JW-01	2.34211	73	-1616.22	1794.48	0.470054	67	0.465925	0.632158	0.212586	0.331166	0.3304	0.3304	0.22	1.53806	High
TCGA_GV_A3JX	TCGA_GV_A3JX_01A	TCGA-GV-A3JX-01	6.86842	278	-1439.14	-600.563	0.894287	19	0.414603	0.645036	0.212611	0.307448	0.3614	0.3614	0.39	2.24173	High
TCGA_GV_A3JZ	TCGA_GV_A3JZ_01A	TCGA-GV-A3JZ-01	13.9211	422	-510.88	-1094.45	0.957509	57	0.47798	0.617811	0.172491	0.250778	0.2047	0.2047	0.51	1.71537	High
TCGA_GV_A3QF	TCGA_GV_A3QF_01A	TCGA-GV-A3QF-01	3.92105	128	-1804.79	-24.4937	0.721677	30	0.468181	0.539024	0.250117	0.360201	0.332	0.332	0	3.02072	High
TCGA_GV_A3QH	TCGA_GV_A3QH_01A	TCGA-GV-A3QH-01	5.23684	157	-2317.13	-215.552	0.964817	36	0.540962	0.617641	0.146001	0.224566	0.3291	0.3291	0.04	2.10212	High
TCGA_GV_A3QI	TCGA_GV_A3QI_01A	TCGA-GV-A3QI-01	14.8947	420	-1931.62	539.032	0.844118	57	0.519483	0.529064	0.136475	0.198484	0.2822	0.2822	0.27	0.457067	Low
TCGA_GV_A3QK	TCGA_GV_A3QK_01B	TCGA-GV-A3QK-01	4.73684	124	-1449.13	35.6711	0.784371	17	0.440363	0.494625	0.22469	0.323398	0.329	0.329	0.19	0.782191	Low
TCGA_GV_A40E	TCGA_GV_A40E_01A	TCGA-GV-A40E-01	3.10526	142	-750.13	-856.549	0.991123	66	0.436789	0.560534	0.248986	0.344478	0.3372	0.3372	0.07	6.25461	High
TCGA_GV_A40G	TCGA_GV_A40G_01A	TCGA-GV-A40G-01	4.65789	148	-1930.17	434.446	0.710855	49	0.494245	0.651139	0.164184	0.266392	0.3349	0.3349	0.38	0.457067	Low
TCGA_GV_A6ZA	TCGA_GV_A6ZA_01A	TCGA-GV-A6ZA-01	9.18421	293	-1557.82	408.718	0.836171	32	0.521053	0.737185	0.274309	0.367561	0.3131	0.3131	0.04	0.115107	Low
TCGA_H4_A2HO	TCGA_H4_A2HO_01A	TCGA-H4-A2HO-01	3.13158	341	-938.35	-689.809	0.908504	0	0.309554	0.602472	0.223949	0.318263	0.3089	0.3089	0	0.537973	Low
TCGA_H4_A2HQ	TCGA_H4_A2HQ_01A	TCGA-H4-A2HQ-01	14.2895	428	-1871.93	-303.861	0.842353	36	0.438283	0.520093	0.21632	0.332475	0.3244	0.3244	0.68	1.13843	High
TCGA_HQ_A2OE	TCGA_HQ_A2OE_01A	TCGA-HQ-A2OE-01	4.42105	140	-1890.25	-245.124	0.920398	47	0.521231	0.500268	0.316447	0.439122	0.3239	0.3239	0.11	0.813093	Low
TCGA_HQ_A2OF	TCGA_HQ_A2OF_01A	TCGA-HQ-A2OF-01	3.34211	97	-1753.58	335.983	0.843752	28	NA	NA	NA	NA	0.3243	0.3243	0.3	1.53806	High
TCGA_HQ_A5ND	TCGA_HQ_A5ND_01A	TCGA-HQ-A5ND-01	2.84211	79	-1838.17	-321.891	0.925024	22	0.540411	0.706014	0.276087	0.392987	0.3046	0.3046	0.11	2.69814	High
TCGA_HQ_A5NE	TCGA_HQ_A5NE_01A	TCGA-HQ-A5NE-01	9.13158	339	-614.14	-473.023	0.970353	42	0.347703	0.72626	0.266976	0.348818	0.3097	0.3097	0	2.7066	High
TCGA_K4_A3WS	TCGA_K4_A3WS_01A	TCGA-K4-A3WS-01	7.28947	266	1059.55	444.757	0.793465	52	0.238706	0.707386	0.164195	0.254993	0.3383	0.3383	0	2.79979	High
TCGA_K4_A3WU	TCGA_K4_A3WU_01B	TCGA-K4-A3WU-01	2.94737	178	16.2	-346.246	0.956893	7	0.212434	0.564032	0.189334	0.270868	0.3345	0.3345	0.07	1.51588	High
TCGA_K4_A3WV	TCGA_K4_A3WV_01A	TCGA-K4-A3WV-01	1.97368	59	-1429.31	-705.181	0.974783	59	0.426926	0.484868	0.220139	0.309182	0.3383	0.3383	0.17	1.11582	High
TCGA_K4_A4AB	TCGA_K4_A4AB_01B	TCGA-K4-A4AB-01	3.21053	88	28.19	-597.229	0.963414	16	0.193147	0.60093	0.372834	0.472141	0.3107	0.3107	0.19	1.97944	High
TCGA_K4_A4AC	TCGA_K4_A4AC_01A	TCGA-K4-A4AC-01	3.89474	137	-721.39	1725.06	0.591852	45	0.495111	0.593452	0.183504	0.262499	0.303	0.303	0	0.798833	Low
TCGA_K4_A54R	TCGA_K4_A54R_01A	TCGA-K4-A54R-01	30.2632	849	98.89	-596.158	0.975314	39	0.376288	0.570675	0.183521	0.286809	0.3101	0.3101	0	1.11582	High
TCGA_K4_A5RH	TCGA_K4_A5RH_01A	TCGA-K4-A5RH-01	5.23684	172	803.73	1428.54	0.790788	40	0.314488	0.309199	0.16221	0.235482	0.3108	0.3108	0.09	1.14672	High
TCGA_K4_A5RI	TCGA_K4_A5RI_01A	TCGA-K4-A5RI-01	4.34211	124	-795.87	6.02925	0.876831	19	0.39464	0.827522	0.20762	0.313962	0.3098	0.3098	0.29	1.11582	High
TCGA_K4_A5RJ	TCGA_K4_A5RJ_01A	TCGA-K4-A5RJ-01	11.2632	321	384.79	159.983	0.912124	34	0.45117	0.543808	0.132761	0.200201	0.3069	0.3069	0.01	0.571183	Low
TCGA_K4_A6FZ	TCGA_K4_A6FZ_01A	TCGA-K4-A6FZ-01	12.3684	360	-1099.12	-685.457	0.962307	35	0.363338	0.608116	0.17345	0.24278	0.3253	0.3253	0	1.41186	High
TCGA_K4_A6MB	TCGA_K4_A6MB_01A	TCGA-K4-A6MB-01	10.7368	300	-520.33	1196.62	0.718586	35	0.362966	0.717443	0.290625	0.404546	0.336	0.336	0.3	6.64531	High
TCGA_K4_A83P	TCGA_K4_A83P_01A	TCGA-K4-A83P-01	1.97368	250	1014.19	-242.854	0.863596	48	0.274786	0.639105	0.181197	0.263966	0.3253	0.3253	0	0.885958	Low
TCGA_K4_AAQO	TCGA_K4_AAQO_01A	TCGA-K4-AAQO-01	7.21053	232	300.46	1367.56	0.628781	36	0.271257	0.718929	0.195768	0.284051	0.3306	0.3306	0	1.13678	High
TCGA_KQ_A41N	TCGA_KQ_A41N_01A	TCGA-KQ-A41N-01	8.02632	2540	-1352.3	-512.016	0.954915	34	0.399326	0.576348	0.370999	0.478849	0.2975	0.2975	0	1.54527	High
TCGA_KQ_A41O	TCGA_KQ_A41O_01A	TCGA-KQ-A41O-01	7.97368	212	-2628.68	405.144	0.870504	23	0.505558	0.480081	0.306055	0.402509	0.3385	0.3385	0.17	1.13511	High
TCGA_KQ_A41P	TCGA_KQ_A41P_01A	TCGA-KQ-A41P-01	9.68421	280	-220.45	215.564	0.79085	35	0.36793	0.581637	0.339797	0.430917	0.3389	0.3389	0.37	1.46085	High
TCGA_KQ_A41Q	TCGA_KQ_A41Q_01A	TCGA-KQ-A41Q-01	4.94737	232	-1546.67	1398.33	0.507442	37	0.50668	0.57124	0.271779	0.374115	0.32	0.32	0.15	0.391257	Low
TCGA_KQ_A41R	TCGA_KQ_A41R_01A	TCGA-KQ-A41R-01	24.1579	683	-1507.01	912.95	0.805629	26	0.397078	0.575398	0.40329	0.532133	0.3252	0.3252	0.06	1.41726	High
TCGA_KQ_A41S	TCGA_KQ_A41S_01A	TCGA-KQ-A41S-01	5.5	239	217.38	718.193	0.758891	23	0.304098	0.659604	0.203254	0.291143	0.3092	0.3092	0.03	0.61767	Low
TCGA_LC_A66R	TCGA_LC_A66R_01A	TCGA-LC-A66R-01	4.15789	127	-502.71	-661.419	0.928006	35	0.439192	0.75188	0.219982	0.314679	0.3111	0.3111	0.04	2.79979	High
TCGA_LT_A5Z6	TCGA_LT_A5Z6_01A	TCGA-LT-A5Z6-01	12.8684	461	-1927.72	-469.023	0.877975	20	0.514707	0.61114	0.155646	0.222626	0.312	0.312	0.23	0.283569	Low
TCGA_LT_A8JT	TCGA_LT_A8JT_01A	TCGA-LT-A8JT-01	2.47368	70	-1590.41	1678.51	0.39317	6	0.379094	0.549115	0.349304	0.465613	0.3335	0.3335	0	0.978099	Low
TCGA_MV_A51V	TCGA_MV_A51V_01A	TCGA-MV-A51V-01	33.0526	1425	-1371.3	-225	0.897128	38	0.386002	0.564415	0.155809	0.245763	0.2968	0.2968	0	1.1908	High
TCGA_PQ_A6FI	TCGA_PQ_A6FI_01A	TCGA-PQ-A6FI-01	5.15789	143	-1367.59	1147.43	0.749935	39	0.545281	0.688506	0.312564	0.444071	0.345	0.345	0.6	1.34329	High
TCGA_PQ_A6FN	TCGA_PQ_A6FN_01A	TCGA-PQ-A6FN-01	2.23684	76	-734.68	1592.98	0.528539	36	0.480841	0.676167	0.20014	0.282407	0.3259	0.3259	0	2.23013	High
TCGA_R3_A69X	TCGA_R3_A69X_01A	TCGA-R3-A69X-01	5.26316	200	390.11	2124.81	0.41537	22	0.32943	0.765676	0.190595	0.273455	0.3088	0.3088	0	1.81134	High
TCGA_S5_A6DX	TCGA_S5_A6DX_01A	TCGA-S5-A6DX-01	21.8421	602	230.79	668.041	0.715525	22	0.412659	0.607233	0.221301	0.314864	0.3246	0.3246	0.06	0.247192	Low
TCGA_S5_AA26	TCGA_S5_AA26_01A	TCGA-S5-AA26-01	7.21053	214	-1957.21	-691.715	0.939375	15	0.404102	0.466468	0.358649	0.49307	0.3358	0.3358	0.35	2.9203	High
TCGA_SY_A9G0	TCGA_SY_A9G0_01A	TCGA-SY-A9G0-01	0.921053	46	1015.62	-93.2356	0.904995	23	0.163709	0.648049	0.176673	0.262863	0.3251	0.3251	0	3.97314	High
TCGA_SY_A9G5	TCGA_SY_A9G5_01A	TCGA-SY-A9G5-01	30.1316	928	632.41	-157.796	0.916202	34	0.292119	0.461765	0.236128	0.335804	0.3296	0.3296	0	0.972047	Low
TCGA_UY_A78K	TCGA_UY_A78K_01A	TCGA-UY-A78K-01	14.5263	771	-723.79	149.962	0.849375	51	0.466845	0.793615	0.202426	0.280667	0.3262	0.3262	0.08	0.896019	Low
TCGA_UY_A78L	TCGA_UY_A78L_01A	TCGA-UY-A78L-01	6.10526	188	-448.7	-575.2	0.89443	42	0.42786	0.842631	0.284768	0.380921	0.3174	0.3174	0.03	2.72366	High
TCGA_UY_A78M	TCGA_UY_A78M_01A	TCGA-UY-A78M-01	3.86842	147	-436.67	-638.735	0.955817	34	0.441836	0.733204	0.265119	0.350299	0.3309	0.3309	0.03	0.878715	Low
TCGA_UY_A78N	TCGA_UY_A78N_01A	TCGA-UY-A78N-01	7.63158	267	-1352.24	167.303	0.712336	15	0.435892	0.640708	0.190669	0.271666	0.3186	0.3186	0.15	0.586662	Low
TCGA_UY_A78O	TCGA_UY_A78O_01A	TCGA-UY-A78O-01	5.31579	175	-1078.38	-521.968	0.958352	28	0.392684	0.526205	0.290433	0.38761	0.3287	0.3287	0.05	1.96841	High
TCGA_UY_A78P	TCGA_UY_A78P_01A	TCGA-UY-A78P-01	6.68421	256	-40.64	-484.155	0.858557	21	0.426752	0.834226	0.212707	0.297618	0.3317	0.3317	0	0.608484	Low
TCGA_UY_A8OB	TCGA_UY_A8OB_01A	TCGA-UY-A8OB-01	9.55263	314	-1465.01	-260.418	0.877254	42	0.494147	0.553456	0.29798	0.389215	0.3436	0.3436	0.27	2.10283	High
TCGA_UY_A8OC	TCGA_UY_A8OC_01A	TCGA-UY-A8OC-01	3.02632	87	184.39	571.482	0.746013	22	0.249899	0.548571	0.294287	0.428778	0.3411	0.3411	0	1.99127	High
TCGA_UY_A8OD	TCGA_UY_A8OD_01A	TCGA-UY-A8OD-01	2.65789	89	446.06	1331.21	0.511721	39	0.253095	0.662242	0.26466	0.338536	0.3321	0.3321	0.11	1.7401	High
TCGA_UY_A9PA	TCGA_UY_A9PA_01A	TCGA-UY-A9PA-01	2.10526	160	-1785.72	280.231	0.733422	25	0.353085	0.629869	0.164378	0.242883	0.3199	0.3199	0.01	0.392509	Low
TCGA_UY_A9PB	TCGA_UY_A9PB_01A	TCGA-UY-A9PB-01	15.3158	501	585.95	402.146	0.76523	44	0.35173	0.544612	0.186429	0.271834	0.3303	0.3303	0	0.885958	Low
TCGA_UY_A9PD	TCGA_UY_A9PD_01A	TCGA-UY-A9PD-01	9.07895	262	-397.58	-85.1864	0.886614	39	0.415254	0.617942	0.346516	0.477713	0.3335	0.3335	0.09	2.93223	High
TCGA_UY_A9PE	TCGA_UY_A9PE_01A	TCGA-UY-A9PE-01	6.34211	202	-672.03	-763.599	0.943983	39	0.397582	0.532383	0.242807	0.34365	0.3299	0.3299	0.05	2.69814	High
TCGA_UY_A9PF	TCGA_UY_A9PF_01A	TCGA-UY-A9PF-01	14.6842	419	-636.54	-598.101	0.947109	27	0.367467	0.72984	0.289979	0.387686	0.3126	0.3126	0	0.450581	Low
TCGA_UY_A9PH	TCGA_UY_A9PH_01A	TCGA-UY-A9PH-01	11.4737	326	61.16	-1014.84	0.995309	19	0.425838	0.666558	0.272915	0.389269	0.3177	0.3177	0.05	0.893631	Low
TCGA_XF_A8HB	TCGA_XF_A8HB_01A	TCGA-XF-A8HB-01	2.15789	70	-2137.37	-149.583	0.923376	23	0.525477	0.587315	0.215625	0.3126	0.325	0.325	0	1.13167	High
TCGA_XF_A8HC	TCGA_XF_A8HC_01A	TCGA-XF-A8HC-01	4.92105	117	-2138.72	-269.521	0.949208	22	0.479683	0.506268	0.217174	0.314934	0.3205	0.3205	0.16	1.85653	High
TCGA_XF_A8HD	TCGA_XF_A8HD_01A	TCGA-XF-A8HD-01	14.1053	430	-437.8	-539.177	0.964978	23	0.36115	0.53954	0.157305	0.228457	0.3243	0.3243	0.01	0.347879	Low
TCGA_XF_A8HE	TCGA_XF_A8HE_01A	TCGA-XF-A8HE-01	11	382	-463	-183.972	0.853653	7	0.475938	0.445165	0.199244	0.273588	0.3143	0.3143	0	1.09985	High
TCGA_XF_A8HF	TCGA_XF_A8HF_01A	TCGA-XF-A8HF-01	4.13158	146	-393.07	1368.55	0.80268	30	0.388749	0.715901	0.38894	0.496937	0.3266	0.3266	0	1.88076	High
TCGA_XF_A8HG	TCGA_XF_A8HG_01A	TCGA-XF-A8HG-01	8.97368	273	-1809.26	-67.0457	0.773179	18	0.499398	0.64119	0.382236	0.476542	0.4143	0.4143	1.05	1.23535	High
TCGA_XF_A8HH	TCGA_XF_A8HH_01A	TCGA-XF-A8HH-01	3.23684	84	119.93	1308.9	0.747445	13	0.317175	0.720014	0.223613	0.324324	0.3185	0.3185	0.03	1.37374	High
TCGA_XF_A8HI	TCGA_XF_A8HI_01A	TCGA-XF-A8HI-01	2.34211	66	-1654.55	-734.532	0.885558	3	0.347752	0.524191	0.237963	0.34711	0.3107	0.3107	0	0.582756	Low
TCGA_XF_A9SH	TCGA_XF_A9SH_01A	TCGA-XF-A9SH-01	1.26316	38	-1080.39	1266.98	0.74287	13	0.3719	0.735783	0.334719	0.42151	0.3284	0.3284	0	0.975131	Low
TCGA_XF_A9SI	TCGA_XF_A9SI_01A	TCGA-XF-A9SI-01	4.92105	324	563.86	1734.89	0.571694	32	0.3703	0.564973	0.154863	0.223536	0.3327	0.3327	0	0.608484	Low
TCGA_XF_A9SJ	TCGA_XF_A9SJ_01A	TCGA-XF-A9SJ-01	5.76316	263	67.86	1785.8	0.536959	51	0.381316	0.725415	0.195615	0.282003	0.3337	0.3337	0	0.893631	Low
TCGA_XF_A9SK	TCGA_XF_A9SK_01A	TCGA-XF-A9SK-01	4.44737	137	632.81	-834.735	0.979134	35	0.257082	0.6112	0.281787	0.381628	0.3411	0.3411	0	5.14789	High
TCGA_XF_A9SL	TCGA_XF_A9SL_01A	TCGA-XF-A9SL-01	0.447368	89	1033.45	301.971	0.800582	NA	0.195412	0.55859	0.134878	0.198515	0.3304	0.3304	0	2.16087	High
TCGA_XF_A9SM	TCGA_XF_A9SM_01A	TCGA-XF-A9SM-01	5.10526	219	474.68	405.37	0.816727	43	0.414216	0.560822	0.184626	0.264223	0.3449	0.3449	0	0.507866	Low
TCGA_XF_A9SP	TCGA_XF_A9SP_01A	TCGA-XF-A9SP-01	7.89474	285	838.13	2903.2	0.297394	43	0.244124	0.689855	0.266259	0.329979	0.3304	0.3304	0.05	1.97416	High
TCGA_XF_A9ST	TCGA_XF_A9ST_01A	TCGA-XF-A9ST-01	17.4474	525	-1595.21	1934.49	0.453251	61	0.632415	0.484498	0.140014	0.195471	0.3563	0.3563	0.59	3.10451	High
TCGA_XF_A9SU	TCGA_XF_A9SU_01A	TCGA-XF-A9SU-01	1.10526	56	302.01	772.263	0.718633	30	0.327274	0.6578	0.202917	0.286441	0.3239	0.3239	0	3.22133	High
TCGA_XF_A9SV	TCGA_XF_A9SV_01A	TCGA-XF-A9SV-01	2.26316	63	80.45	-895.325	0.957052	25	0.315724	0.66932	0.244645	0.325326	0.3499	0.3499	0.13	1.2693	High
TCGA_XF_A9SW	TCGA_XF_A9SW_01A	TCGA-XF-A9SW-01	1.57895	46	1444.14	1356.34	0.61376	43	0.158162	0.530015	0.111758	0.16697	0.3442	0.3442	0	1.93164	High
TCGA_XF_A9SX	TCGA_XF_A9SX_01A	TCGA-XF-A9SX-01	3.07895	101	860.41	-107.902	0.859124	20	0.296533	0.418058	0.14864	0.21763	0.3302	0.3302	0.01	0.893631	Low
TCGA_XF_A9SY	TCGA_XF_A9SY_01A	TCGA-XF-A9SY-01	8.34211	402	464.64	-384.108	0.772732	44	0.434979	0.620016	0.17769	0.243543	0.3446	0.3446	0	2.4979	High
TCGA_XF_A9SZ	TCGA_XF_A9SZ_01A	TCGA-XF-A9SZ-01	5.76316	203	520.11	-232.673	0.886809	41	0.309867	0.677723	0.21146	0.303677	0.3208	0.3208	0.03	6.64531	High
TCGA_XF_A9T0	TCGA_XF_A9T0_01A	TCGA-XF-A9T0-01	26.7105	682	-388.57	-684.728	0.979748	34	0.421851	0.641552	0.233957	0.32235	0.3307	0.3307	0.12	0.202542	Low
TCGA_XF_A9T2	TCGA_XF_A9T2_01A	TCGA-XF-A9T2-01	2.63158	79	-236.6	1270.25	0.645279	3	0.368175	0.634811	0.490676	0.579409	0.3136	0.3136	0.08	1.99127	High
TCGA_XF_A9T3	TCGA_XF_A9T3_01A	TCGA-XF-A9T3-01	12.5263	358	409.65	2666.64	0.382377	37	0.298246	0.657478	0.221391	0.285107	0.3388	0.3388	0	1.64792	High
TCGA_XF_A9T4	TCGA_XF_A9T4_01A	TCGA-XF-A9T4-01	1.23684	34	-874.57	-799.159	0.940745	6	0.279379	0.540278	0.242566	0.358476	0.3207	0.3207	0	1.88774	High
TCGA_XF_A9T5	TCGA_XF_A9T5_01A	TCGA-XF-A9T5-01	21.1053	630	-116.3	585.576	0.773733	27	0.481471	0.595477	0.153875	0.242158	0.3398	0.3398	0.02	0.780652	Low
TCGA_XF_A9T6	TCGA_XF_A9T6_01A	TCGA-XF-A9T6-01	10.0526	294	-1410.53	881.423	0.62138	45	0.524393	0.747045	0.241906	0.359327	0.3434	0.3434	0.04	0.260368	Low
TCGA_XF_A9T8	TCGA_XF_A9T8_01A	TCGA-XF-A9T8-01	20.1579	647	212.91	647.664	0.72811	20	0.389847	0.522068	0.242394	0.311208	0.3155	0.3155	0	0.731232	Low
TCGA_XF_AAME	TCGA_XF_AAME_01A	TCGA-XF-AAME-01	0.105263	22	1504.34	1331.45	0.658868	16	0.224144	0.656805	0.167323	0.233461	0.3473	0.3473	0.05	1.58528	High
TCGA_XF_AAMG	TCGA_XF_AAMG_01A	TCGA-XF-AAMG-01	29.0789	901	-350.76	1289.57	0.781681	71	0.488427	0.889825	0.296701	0.401529	0.3446	0.3446	0.26	0.372977	Low
TCGA_XF_AAMH	TCGA_XF_AAMH_01A	TCGA-XF-AAMH-01	1.84211	57	-1084.91	-350.182	0.836481	4	0.351737	0.833526	0.207955	0.29457	0.3462	0.3462	0.09	1.00928	Low
TCGA_XF_AAMJ	TCGA_XF_AAMJ_01A	TCGA-XF-AAMJ-01	0.842105	40	1102.48	1015.38	0.715719	21	0.209543	0.74525	0.178796	0.248011	0.3403	0.3403	0	5.45352	High
TCGA_XF_AAML	TCGA_XF_AAML_01A	TCGA-XF-AAML-01	14.6053	449	-2225.62	-1179.48	0.993666	30	0.541914	0.688109	0.180749	0.260104	0.332	0.332	0	0.612053	Low
TCGA_XF_AAMQ	TCGA_XF_AAMQ_01A	TCGA-XF-AAMQ-01	6.73684	169	-858.13	-1201.22	0.997507	21	0.410437	0.559472	0.255359	0.341656	0.3299	0.3299	0.2	0.999074	Low
TCGA_XF_AAMR	TCGA_XF_AAMR_01A	TCGA-XF-AAMR-01	2.84211	92	392.12	-439.973	0.969149	12	0.197271	0.613976	0.136339	0.197298	0.3313	0.3313	0	2.69814	High
TCGA_XF_AAMT	TCGA_XF_AAMT_01A	TCGA-XF-AAMT-01	3.10526	100	747.13	-181.912	0.813538	27	0.24813	0.585782	0.25655	0.326077	0.3377	0.3377	0.02	1.33274	High
TCGA_XF_AAMW	TCGA_XF_AAMW_01A	TCGA-XF-AAMW-01	1.02632	24	-594.97	251.56	0.76324	21	0.328742	0.587508	0.27676	0.384383	0.3357	0.3357	0	2.55521	High
TCGA_XF_AAMX	TCGA_XF_AAMX_01A	TCGA-XF-AAMX-01	10.4211	301	-475.16	465.895	0.8835	101	0.433023	0.51568	0.444938	0.556088	0.3598	0.3598	0.97	3.25018	High
TCGA_XF_AAMY	TCGA_XF_AAMY_01A	TCGA-XF-AAMY-01	3.23684	108	100.91	-364.402	0.858363	22	0.290566	0.584129	0.198422	0.298607	0.3472	0.3472	0	3.97314	High
TCGA_XF_AAMZ	TCGA_XF_AAMZ_01A	TCGA-XF-AAMZ-01	4.23684	265	-1198.15	271.267	0.868133	42	0.53467	0.74127	0.154343	0.225802	0.3312	0.3312	0.04	0.610195	Low
TCGA_XF_AAN0	TCGA_XF_AAN0_01A	TCGA-XF-AAN0-01	12.4737	390	-588.76	-494.516	0.919527	6	0.396228	0.620908	0.125869	0.19599	0.3361	0.3361	0.01	1.70435	High
TCGA_XF_AAN1	TCGA_XF_AAN1_01A	TCGA-XF-AAN1-01	2.71053	72	-1591.48	-578.904	0.862058	15	0.475714	0.648678	0.225916	0.343347	0.3411	0.3411	0.06	1.4483	High
TCGA_XF_AAN2	TCGA_XF_AAN2_01A	TCGA-XF-AAN2-01	15.5263	414	-1071.77	971.508	0.650445	27	0.481091	0.595935	0.156624	0.25601	0.3328	0.3328	0.17	1.14753	High
TCGA_XF_AAN3	TCGA_XF_AAN3_01A	TCGA-XF-AAN3-01	4.42105	129	138.84	-137.859	0.835575	11	0.289958	0.678824	0.216081	0.317221	0.323	0.323	0	1.99658	High
TCGA_XF_AAN4	TCGA_XF_AAN4_01A	TCGA-XF-AAN4-01	0.157895	42	1573.05	-1052.14	0.986354	1	0.16845	0.551732	0.130405	0.179856	0.3224	0.3224	0.01	1.56034	High
TCGA_XF_AAN5	TCGA_XF_AAN5_01A	TCGA-XF-AAN5-01	9.47368	294	-776.08	-1301.46	0.993606	15	0.408227	0.645602	0.113241	0.178564	0.3505	0.3505	0	1.77992	High
TCGA_XF_AAN7	TCGA_XF_AAN7_01A	TCGA-XF-AAN7-01	4.47368	131	-223.17	-1333.74	0.990425	23	0.345442	0.502086	0.252032	0.336018	0.3503	0.3503	0.19	1.62018	High
TCGA_XF_AAN8	TCGA_XF_AAN8_01A	TCGA-XF-AAN8-01	0.0263158	1	2175.37	-938.338	0.945382	0	0.117131	0.66733	0.118841	0.163606	0.3303	0.3303	0	2.07903	High
TCGA_YC_A89H	TCGA_YC_A89H_01A	TCGA-YC-A89H-01	54.7105	1376	-793.38	-684.556	0.970511	8	0.386092	0.669998	0.207086	0.291021	0.3228	0.3228	0	1.20331	High
TCGA_YC_A8S6	TCGA_YC_A8S6_01A	TCGA-YC-A8S6-01	2.10526	98	481.59	-631.501	0.942817	3	0.216465	0.63363	0.193042	0.272159	0.3231	0.3231	0	1.41186	High
TCGA_YC_A9TC	TCGA_YC_A9TC_01A	TCGA-YC-A9TC-01	3.84211	112	-1081.85	611.027	0.711826	5	0.553848	0.628808	0.289155	0.385181	0.3269	0.3269	0	0.239641	Low
TCGA_YF_AA3L	TCGA_YF_AA3L_01A	TCGA-YF-AA3L-01	9.26316	282	-1490.5	-550.398	0.982734	23	0.371636	0.3514	0.225999	0.337965	0.3276	0.3276	0.26	0.274684	Low
TCGA_YF_AA3M	TCGA_YF_AA3M_01A	TCGA-YF-AA3M-01	5.05263	139	-1698.28	286.73	0.782843	36	0.503399	0.795422	0.239991	0.341004	0.3537	0.3537	0.31	0.544206	Low
TCGA_ZF_A9R0	TCGA_ZF_A9R0_01A	TCGA-ZF-A9R0-01	6.18421	177	-750.26	1039.04	0.797076	30	0.358746	0.721471	0.243619	0.359984	0.324	0.324	0.09	2.03178	High
TCGA_ZF_A9R1	TCGA_ZF_A9R1_01A	TCGA-ZF-A9R1-01	3.18421	86	-1337.45	24.2449	0.921445	28	0.400194	0.692859	0.215237	0.315265	0.3169	0.3169	0	1.41948	High
TCGA_ZF_A9R2	TCGA_ZF_A9R2_01A	TCGA-ZF-A9R2-01	4.52632	135	-2579.27	303.643	0.845352	20	0.442644	0.636691	0.274811	0.367465	0.3339	0.3339	0.23	1.4483	High
TCGA_ZF_A9R3	TCGA_ZF_A9R3_01A	TCGA-ZF-A9R3-01	2.65789	80	-1333.28	-493.414	0.947946	13	0.368457	0.676048	0.235529	0.348811	0.3303	0.3303	0	1.96841	High
TCGA_ZF_A9R4	TCGA_ZF_A9R4_01A	TCGA-ZF-A9R4-01	8.10526	231	-1754.81	-641.528	0.988818	22	0.512634	0.530593	0.223675	0.344051	0.3277	0.3277	0.04	1.13346	High
TCGA_ZF_A9R5	TCGA_ZF_A9R5_01A	TCGA-ZF-A9R5-01	3.18421	98	-1821.22	798.411	0.762039	3	0.43378	0.41461	0.23623	0.357288	0.3446	0.3446	0	0.0795737	Low
TCGA_ZF_A9R7	TCGA_ZF_A9R7_01A	TCGA-ZF-A9R7-01	22.2895	636	-1145.2	365.034	0.726359	18	0.351407	0.43455	0.280751	0.401116	0.3149	0.3149	0.01	0.965514	Low
TCGA_ZF_A9R9	TCGA_ZF_A9R9_01A	TCGA-ZF-A9R9-01	6.07895	183	641.58	-215.179	0.912661	20	0.206309	0.568802	0.282074	0.355904	0.3215	0.3215	0.04	2.73321	High
TCGA_ZF_A9RC	TCGA_ZF_A9RC_01A	TCGA-ZF-A9RC-01	25.3684	850	-79.45	-1900.04	0.999737	47	0.294666	0.464819	0.19108	0.291341	0.3184	0.3184	0.01	3.56261	High
TCGA_ZF_A9RD	TCGA_ZF_A9RD_01A	TCGA-ZF-A9RD-01	5.5	158	-443.64	738.481	0.728862	NA	0.423782	0.764108	0.149956	0.220681	NA	0.3238	0.01	0.694297	Low
TCGA_ZF_A9RE	TCGA_ZF_A9RE_01A	TCGA-ZF-A9RE-01	1.52632	63	-2116.15	361.622	0.80803	15	0.491287	0.520731	0.330396	0.451506	0.3249	0.3249	0.04	2.69814	High
TCGA_ZF_A9RF	TCGA_ZF_A9RF_01A	TCGA-ZF-A9RF-01	7.15789	233	-885.8	-546.04	0.954988	70	0.430368	0.569119	0.2396	0.334317	0.3261	0.3261	0.01	1.08575	High
TCGA_ZF_A9RL	TCGA_ZF_A9RL_01A	TCGA-ZF-A9RL-01	9.05263	313	-2279.02	1192.01	0.656302	16	0.455341	0.621691	0.298642	0.424697	0.3199	0.3199	0.03	1.04137	High
TCGA_ZF_A9RM	TCGA_ZF_A9RM_01A	TCGA-ZF-A9RM-01	2.28947	84	-2548.64	1291.34	0.614159	33	0.52031	0.740103	0.149873	0.247268	0.3234	0.3234	0.01	1.49084	High
TCGA_ZF_A9RN	TCGA_ZF_A9RN_01A	TCGA-ZF-A9RN-01	6	167	-1315.42	-553.568	0.951751	43	0.56517	0.567516	0.281857	0.393142	0.3604	0.3604	0.51	0.474189	Low
TCGA_ZF_AA4N	TCGA_ZF_AA4N_01A	TCGA-ZF-AA4N-01	4.68421	152	-905.27	-1288.49	0.993134	6	0.333883	0.61254	0.219513	0.289945	0.3301	0.3301	0.01	2.09136	High
TCGA_ZF_AA4R	TCGA_ZF_AA4R_01A	TCGA-ZF-AA4R-01	1.55263	63	46.47	-137.38	0.95063	33	0.328722	0.626179	0.194507	0.291691	0.3355	0.3355	0	3.11785	High
TCGA_ZF_AA4T	TCGA_ZF_AA4T_01A	TCGA-ZF-AA4T-01	2.71053	88	-1856.15	468.369	0.81167	61	0.591013	0.643529	0.267197	0.381861	0.3218	0.3218	0.05	0.205579	Low
TCGA_ZF_AA4U	TCGA_ZF_AA4U_01A	TCGA-ZF-AA4U-01	2	54	-2425.47	1863.34	0.558514	14	0.437209	0.696838	0.297751	0.405661	0.3297	0.3297	0.01	1.54256	High
TCGA_ZF_AA4V	TCGA_ZF_AA4V_01A	TCGA-ZF-AA4V-01	21.7632	585	-631.82	1628.01	0.668866	37	0.478567	0.601554	0.260601	0.368165	0.3277	0.3277	0.06	0.471372	Low
TCGA_ZF_AA4X	TCGA_ZF_AA4X_01A	TCGA-ZF-AA4X-01	16.8947	586	-2559.9	724.367	0.788816	17	0.469526	0.629672	0.179183	0.26128	0.3141	0.3141	0	0.974273	Low
TCGA_ZF_AA51	TCGA_ZF_AA51_01A	TCGA-ZF-AA51-01	20.0789	626	-116.75	-601.852	0.962154	51	0.396203	0.494191	0.171972	0.270588	0.3215	0.3215	0.02	1.3936	High
TCGA_ZF_AA52	TCGA_ZF_AA52_01A	TCGA-ZF-AA52-01	2.5	106	670.49	-844.552	0.954406	15	0.2707	0.603147	0.213455	0.288407	0.3286	0.3286	0.03	4.84803	High
TCGA_ZF_AA53	TCGA_ZF_AA53_01A	TCGA-ZF-AA53-01	3.94737	166	463.28	-407.676	0.95272	39	0.354067	0.592353	0.18952	0.251554	0.3233	0.3233	0	2.22056	High
TCGA_ZF_AA54	TCGA_ZF_AA54_01A	TCGA-ZF-AA54-01	5.60526	176	779.73	351.183	0.846787	34	0.411294	0.661098	0.178877	0.25783	0.3286	0.3286	0.01	1.89611	High
TCGA_ZF_AA56	TCGA_ZF_AA56_01A	TCGA-ZF-AA56-01	2.68421	103	-361.07	-139.597	0.849851	37	0.343578	0.740209	0.211714	0.29019	0.3257	0.3257	0.01	2.20719	High
TCGA_ZF_AA58	TCGA_ZF_AA58_01A	TCGA-ZF-AA58-01	5.26316	206	685.88	-589.402	0.952683	62	0.39169	0.441408	0.150579	0.219679	0.3394	0.3394	0	1.14366	High
TCGA_ZF_AA5H	TCGA_ZF_AA5H_01A	TCGA-ZF-AA5H-01	1.97368	56	-367.75	837.231	0.79227	43	0.359393	0.730263	0.318478	0.399135	0.3208	0.3208	0.07	1.02679	High
TCGA_ZF_AA5N	TCGA_ZF_AA5N_01A	TCGA-ZF-AA5N-01	1.60526	50	-1684.31	-514.864	0.944316	4	0.402112	0.742319	0.271649	0.334126	0.3314	0.3314	0	0.712785	Low
TCGA_ZF_AA5P	TCGA_ZF_AA5P_01A	TCGA-ZF-AA5P-01	0.631579	50	585.66	1092.13	0.754363	NA	0.233437	0.667644	0.182731	0.254673	0.3325	0.3325	0.05	1.62018	High

## Sheet: Table S8
Table S8: The CTCPI score in the six cohorts
BLCA cohort	Sample ID	CTCPI
Meta-testing cohort 1_1	GSM806926	1.88629
Meta-testing cohort 1_10	BLCA_Nac_86	2.89792
Meta-testing cohort 1_101	GSM2454214	0.975322
Meta-testing cohort 1_103	GSM814229	0.579863
Meta-testing cohort 1_104	U0585	1.00325
Meta-testing cohort 1_107	U1153	0.938637
Meta-testing cohort 1_109	GSM2301904	2.45804
Meta-testing cohort 1_11	GSM2301892	2.16457
Meta-testing cohort 1_114	GSM340679.y	1.90967
Meta-testing cohort 1_115	U0618	1.07888
Meta-testing cohort 1_116	GSM814322	2.43031
Meta-testing cohort 1_119	TCGA_ZF_AA4V	2.71869
Meta-testing cohort 1_119	TCGA_ZF_AA4V	2.71869
Meta-testing cohort 1_12	U0400	1.52103
Meta-testing cohort 1_120	TCGA_G2_A2EF	1.66982
Meta-testing cohort 1_120	TCGA_G2_A2EF	1.66982
Meta-testing cohort 1_123	GSM340726	0.572865
Meta-testing cohort 1_124	TCGA_GC_A3OO	2.31994
Meta-testing cohort 1_124	TCGA_GC_A3OO	2.31994
Meta-testing cohort 1_126	GSM340740.y	1.56444
Meta-testing cohort 1_127	GSM806831	1.17531
Meta-testing cohort 1_128	TCGA_XF_A9T4	3.11205
Meta-testing cohort 1_128	TCGA_XF_A9T4	3.11205
Meta-testing cohort 1_13	GSM2301824	1.89008
Meta-testing cohort 1_133	GSM814171	1.47746
Meta-testing cohort 1_136	GSM2301848	2.6969
Meta-testing cohort 1_137	U0317	0.957736
Meta-testing cohort 1_139	U0580	1.4846
Meta-testing cohort 1_14	GSM3699751	0.922912
Meta-testing cohort 1_140	GSM340713.y	1.10192
Meta-testing cohort 1_143	GSM2454231	0.888966
Meta-testing cohort 1_144	TCGA_ZF_AA5H	2.96854
Meta-testing cohort 1_144	TCGA_ZF_AA5H	2.96854
Meta-testing cohort 1_145	TCGA_DK_AA6L	2.99722
Meta-testing cohort 1_145	TCGA_DK_AA6L	2.99722
Meta-testing cohort 1_146	GSM786545	2.92932
Meta-testing cohort 1_147	U0502	1.10637
Meta-testing cohort 1_15	TCGA_GV_A3QF	3.73455
Meta-testing cohort 1_15	TCGA_GV_A3QF	3.73455
Meta-testing cohort 1_150	U0514	1.20005
Meta-testing cohort 1_151	GSM340608.x	1.55538
Meta-testing cohort 1_152	TCGA_XF_A9SZ	4.3387
Meta-testing cohort 1_152	TCGA_XF_A9SZ	4.3387
Meta-testing cohort 1_153	U0307	0.561977
Meta-testing cohort 1_154	GSM3699760	1.10493
Meta-testing cohort 1_155	BLCA_Cx_280	2.66701
Meta-testing cohort 1_157	GSM3699747	0.703697
Meta-testing cohort 1_16	TCGA_FJ_A3Z7	3.26627
Meta-testing cohort 1_16	TCGA_FJ_A3Z7	3.26627
Meta-testing cohort 1_160	TCGA_BT_A20X	3.18858
Meta-testing cohort 1_160	TCGA_BT_A20X	3.18858
Meta-testing cohort 1_161	U0322	0.486336
Meta-testing cohort 1_163	U0129	2.56589
Meta-testing cohort 1_164	GSM3699768	0.615958
Meta-testing cohort 1_165	GSM814303	0.768272
Meta-testing cohort 1_167	U1434	0.896225
Meta-testing cohort 1_169	BLCA_Nac_150	1.70484
Meta-testing cohort 1_172	GSM2301868	3.42522
Meta-testing cohort 1_173	TCGA_DK_A3IT	2.55787
Meta-testing cohort 1_173	TCGA_DK_A3IT	2.55787
Meta-testing cohort 1_174	GSM340736.y	1.64195
Meta-testing cohort 1_175	BLCA_Cx_256	2.5205
Meta-testing cohort 1_18	U1308	0.462273
Meta-testing cohort 1_181	GSM786509	2.17864
Meta-testing cohort 1_182	GSM806918	1.74997
Meta-testing cohort 1_183	GSM340753	0.692243
Meta-testing cohort 1_184	GSM814086	1.03384
Meta-testing cohort 1_185	FR_190_U133_2.CEL	2.36742
Meta-testing cohort 1_186	GSM786527	1.03082
Meta-testing cohort 1_188	TCGA_FD_A43U	3.41203
Meta-testing cohort 1_188	TCGA_FD_A43U	3.41203
Meta-testing cohort 1_189	GSM340663.x	1.68488
Meta-testing cohort 1_190	U1030	1.71605
Meta-testing cohort 1_191	TCGA_BL_A5ZZ	3.18359
Meta-testing cohort 1_191	TCGA_BL_A5ZZ	3.18359
Meta-testing cohort 1_192	GSM806830	1.23559
Meta-testing cohort 1_196	GSM806835	1.74075
Meta-testing cohort 1_198	TCGA_ZF_AA4X	1.77792
Meta-testing cohort 1_198	TCGA_ZF_AA4X	1.77792
Meta-testing cohort 1_199	U0074	1.23467
Meta-testing cohort 1_2	U0062	1.19725
Meta-testing cohort 1_200	GSM814300	1.92792
Meta-testing cohort 1_201	GSM340651.y	1.53557
Meta-testing cohort 1_202	GSM806804	2.5207
Meta-testing cohort 1_204	TCGA_ZF_A9R2	2.29059
Meta-testing cohort 1_204	TCGA_ZF_A9R2	2.29059
Meta-testing cohort 1_206	BLCA_Cx_255	2.32399
Meta-testing cohort 1_208	U0605	0.513127
Meta-testing cohort 1_209	GSM806815	1.83787
Meta-testing cohort 1_21	U0114	0.513267
Meta-testing cohort 1_210	U1413	0.596686
Meta-testing cohort 1_212	GSM786506	2.88152
Meta-testing cohort 1_214	GSM2454221	0.959178
Meta-testing cohort 1_215	TCGA_E7_A7DU	2.74813
Meta-testing cohort 1_215	TCGA_E7_A7DU	2.74813
Meta-testing cohort 1_216	GSM2301784	2.97228
Meta-testing cohort 1_217	GSM806879	2.17968
Meta-testing cohort 1_220	GSM806862	1.12443
Meta-testing cohort 1_222	U0071	0.467039
Meta-testing cohort 1_224	GSM340654	2.42556
Meta-testing cohort 1_225	BLCA_Cx_143	3.099
Meta-testing cohort 1_227	GSM814066	1.19541
Meta-testing cohort 1_234	BLCA_Nac_104	2.32766
Meta-testing cohort 1_235	U0064	0.906211
Meta-testing cohort 1_239	U0475	1.41607
Meta-testing cohort 1_240	U0562	0.454356
Meta-testing cohort 1_241	TCGA_DK_A3WY	2.80713
Meta-testing cohort 1_241	TCGA_DK_A3WY	2.80713
Meta-testing cohort 1_242	GSM2301806	1.54766
Meta-testing cohort 1_243	U0039	0.68215
Meta-testing cohort 1_244	GSM2301902	3.06452
Meta-testing cohort 1_248	BLCA_Nac_42	2.66113
Meta-testing cohort 1_252	U0057	1.01352
Meta-testing cohort 1_253	BLCA_Nac_2	3.37211
Meta-testing cohort 1_256	FR_32_U133_2.CEL	2.86397
Meta-testing cohort 1_257	BLCA_Nac_46	2.71784
Meta-testing cohort 1_26	BLCA_Cx_197	2.41747
Meta-testing cohort 1_262	U1005	0.482788
Meta-testing cohort 1_266	GSM2301835	0.785063
Meta-testing cohort 1_268	GSM340621.y	1.20641
Meta-testing cohort 1_269	TCGA_BT_A0S7	2.81323
Meta-testing cohort 1_269	TCGA_BT_A0S7	2.81323
Meta-testing cohort 1_270	TCGA_XF_AAMX	3.18186
Meta-testing cohort 1_270	TCGA_XF_AAMX	3.18186
Meta-testing cohort 1_271	GSM3699756	1.35736
Meta-testing cohort 1_273	GSM814197	1.04659
Meta-testing cohort 1_278	GSM806928	2.3745
Meta-testing cohort 1_279	FR_182_U133_2.CEL	1.79044
Meta-testing cohort 1_28	GSM3699772	1.05858
Meta-testing cohort 1_282	GSM786537	1.74498
Meta-testing cohort 1_284	GSM806888	0.502174
Meta-testing cohort 1_285	U0645	1.4818
Meta-testing cohort 1_288	TCGA_XF_AAN8	2.98665
Meta-testing cohort 1_288	TCGA_XF_AAN8	2.98665
Meta-testing cohort 1_29	BLCA_Nac_108	2.44787
Meta-testing cohort 1_291	U0195	0.957736
Meta-testing cohort 1_293	GSM786569	2.8261
Meta-testing cohort 1_294	GSM806868	2.11923
Meta-testing cohort 1_295	TCGA_H4_A2HQ	2.98715
Meta-testing cohort 1_295	TCGA_H4_A2HQ	2.98715
Meta-testing cohort 1_296	TCGA_ZF_A9R9	3.25297
Meta-testing cohort 1_296	TCGA_ZF_A9R9	3.25297
Meta-testing cohort 1_297	FR_96_U133_2.CEL	2.36389
Meta-testing cohort 1_298	GSM340769	2.36773
Meta-testing cohort 1_299	GSM786564	2.80434
Meta-testing cohort 1_30	U0448	1.54008
Meta-testing cohort 1_300	GSM340761	3.49817
Meta-testing cohort 1_302	TCGA_MV_A51V	2.8386
Meta-testing cohort 1_302	TCGA_MV_A51V	2.8386
Meta-testing cohort 1_303	FR_33_U133_2.CEL	1.92044
Meta-testing cohort 1_305	U0256	0.653551
Meta-testing cohort 1_306	FR_310_U133_2.CEL	2.20398
Meta-testing cohort 1_308	U0614	0.46662
Meta-testing cohort 1_309	U0142	1.04171
Meta-testing cohort 1_310	TCGA_UY_A8OB	3.1479
Meta-testing cohort 1_310	TCGA_UY_A8OB	3.1479
Meta-testing cohort 1_316	TCGA_CU_A0YR	3.41704
Meta-testing cohort 1_316	TCGA_CU_A0YR	3.41704
Meta-testing cohort 1_319	TCGA_ZF_AA51	2.28147
Meta-testing cohort 1_319	TCGA_ZF_AA51	2.28147
Meta-testing cohort 1_32	U0060	1.00652
Meta-testing cohort 1_320	TCGA_FD_A6TH	3.28745
Meta-testing cohort 1_320	TCGA_FD_A6TH	3.28745
Meta-testing cohort 1_321	U0378	0.510575
Meta-testing cohort 1_323	TCGA_DK_A1A5	2.50316
Meta-testing cohort 1_323	TCGA_DK_A1A5	2.50316
Meta-testing cohort 1_325	GSM806904	1.59329
Meta-testing cohort 1_327	GSM814325	2.30698
Meta-testing cohort 1_33	TCGA_XF_AAMZ	3.33276
Meta-testing cohort 1_33	TCGA_XF_AAMZ	3.33276
Meta-testing cohort 1_330	TCGA_XF_AAML	2.1512
Meta-testing cohort 1_330	TCGA_XF_AAML	2.1512
Meta-testing cohort 1_333	TCGA_BT_A42C	2.16194
Meta-testing cohort 1_333	TCGA_BT_A42C	2.16194
Meta-testing cohort 1_335	GSM786547	3.31058
Meta-testing cohort 1_337	GSM340743.y	1.84912
Meta-testing cohort 1_338	U1270	0.524939
Meta-testing cohort 1_339	GSM814070	2.17898
Meta-testing cohort 1_340	U1283	1.52915
Meta-testing cohort 1_341	U1288	0.588454
Meta-testing cohort 1_342	GSM2301841	1.60729
Meta-testing cohort 1_346	GSM806927	2.30337
Meta-testing cohort 1_347	U0589	0.911401
Meta-testing cohort 1_349	TCGA_FT_A3EE	2.95251
Meta-testing cohort 1_349	TCGA_FT_A3EE	2.95251
Meta-testing cohort 1_35	U1196	0.975057
Meta-testing cohort 1_350	GSM786558	1.60445
Meta-testing cohort 1_351	GSM340688.y	1.78634
Meta-testing cohort 1_352	U0012	1.0597
Meta-testing cohort 1_356	TCGA_XF_A9SV	3.44262
Meta-testing cohort 1_356	TCGA_XF_A9SV	3.44262
Meta-testing cohort 1_357	GSM814326	1.03742
Meta-testing cohort 1_358	GSM806913	2.18257
Meta-testing cohort 1_359	GSM340649	1.47301
Meta-testing cohort 1_360	GSM814221	0.965751
Meta-testing cohort 1_361	GSM340747	3.45241
Meta-testing cohort 1_363	U0384	1.41864
Meta-testing cohort 1_365	TCGA_ZF_A9R7	2.21011
Meta-testing cohort 1_365	TCGA_ZF_A9R7	2.21011
Meta-testing cohort 1_366	U1338	0.614026
Meta-testing cohort 1_37	U1232	0.896669
Meta-testing cohort 1_371	TCGA_FD_A3N6	1.8648
Meta-testing cohort 1_371	TCGA_FD_A3N6	1.8648
Meta-testing cohort 1_372	U0910	1.64195
Meta-testing cohort 1_373	GSM786580	2.31922
Meta-testing cohort 1_375	GSM3699755	0.619642
Meta-testing cohort 1_377	BLCA_Cx_187	2.07071
Meta-testing cohort 1_379	GSM806932	1.75493
Meta-testing cohort 1_38	BLCA_Nac_54	2.28338
Meta-testing cohort 1_381	U1025	1.63121
Meta-testing cohort 1_382	GSM786543	2.35823
Meta-testing cohort 1_385	GSM2301867	1.39366
Meta-testing cohort 1_386	U1242	0.908355
Meta-testing cohort 1_387	GSM814061	1.13807
Meta-testing cohort 1_388	U0170	2.34655
Meta-testing cohort 1_39	GSM340731	2.39956
Meta-testing cohort 1_393	FR_103_U133_2.CEL	1.87333
Meta-testing cohort 1_395	GSM786508	2.36126
Meta-testing cohort 1_396	TCGA_GV_A40E	3.09171
Meta-testing cohort 1_396	TCGA_GV_A40E	3.09171
Meta-testing cohort 1_397	U0054	1.07199
Meta-testing cohort 1_398	GSM340618	2.97005
Meta-testing cohort 1_399	FR_078_U133_2.CEL	3.09543
Meta-testing cohort 1_4	U0144	0.762711
Meta-testing cohort 1_400	U0654	0.915768
Meta-testing cohort 1_401	GSM2301895	2.78256
Meta-testing cohort 1_402	GSM806811	1.19541
Meta-testing cohort 1_403	GSM806909	1.92624
Meta-testing cohort 1_405	TCGA_CU_A72E	3.65801
Meta-testing cohort 1_405	TCGA_CU_A72E	3.65801
Meta-testing cohort 1_406	U0128	1.00376
Meta-testing cohort 1_407	GSM340715	1.89454
Meta-testing cohort 1_408	TCGA_XF_AAN7	3.06745
Meta-testing cohort 1_408	TCGA_XF_AAN7	3.06745
Meta-testing cohort 1_409	GSM340657.y	1.5981
Meta-testing cohort 1_41	GSM2301860	2.99152
Meta-testing cohort 1_412	TCGA_FD_A3B6	2.14439
Meta-testing cohort 1_412	TCGA_FD_A3B6	2.14439
Meta-testing cohort 1_413	GSM814064	3.22282
Meta-testing cohort 1_416	GSM3699787	1.00235
Meta-testing cohort 1_418	GSM2301810	1.20689
Meta-testing cohort 1_419	U1279	0.53788
Meta-testing cohort 1_424	U0437	0.482003
Meta-testing cohort 1_426	GSM786511	2.71433
Meta-testing cohort 1_428	GSM806827	1.10533
Meta-testing cohort 1_43	U1282	0.447741
Meta-testing cohort 1_430	GSM2454236	1.13735
Meta-testing cohort 1_433	GSM814175	0.947957
Meta-testing cohort 1_434	BLCA_Cx_234	2.47108
Meta-testing cohort 1_435	BLCA_Nac_5	1.94458
Meta-testing cohort 1_436	GSM340693	2.51933
Meta-testing cohort 1_439	TCGA_CU_A3QU	2.83643
Meta-testing cohort 1_439	TCGA_CU_A3QU	2.83643
Meta-testing cohort 1_44	GSM340651.x	1.69965
Meta-testing cohort 1_441	U1052	0.934279
Meta-testing cohort 1_442	GSM2301795	0.86061
Meta-testing cohort 1_444	TCGA_G2_A2ES	2.41823
Meta-testing cohort 1_444	TCGA_G2_A2ES	2.41823
Meta-testing cohort 1_445	BLCA_Nac_44	2.56665
Meta-testing cohort 1_446	U0426	0.899288
Meta-testing cohort 1_448	U0316	0.460708
Meta-testing cohort 1_45	TCGA_HQ_A5NE	2.6576
Meta-testing cohort 1_45	TCGA_HQ_A5NE	2.6576
Meta-testing cohort 1_450	TCGA_FD_A6TE	2.84553
Meta-testing cohort 1_450	TCGA_FD_A6TE	2.84553
Meta-testing cohort 1_452	GSM2301804	0.633069
Meta-testing cohort 1_455	GSM2301799	3.04898
Meta-testing cohort 1_458	FR_186_U133_2.CEL	2.8173
Meta-testing cohort 1_459	TCGA_ZF_A9R5	2.21972
Meta-testing cohort 1_459	TCGA_ZF_A9R5	2.21972
Meta-testing cohort 1_460	GSM814306	0.900055
Meta-testing cohort 1_462	U0516	0.474649
Meta-testing cohort 1_464	BLCA_Nac_48	1.66722
Meta-testing cohort 1_466	GSM340705	3.02707
Meta-testing cohort 1_467	GSM2301872	2.81294
Meta-testing cohort 1_468	U0430	0.967645
Meta-testing cohort 1_469	U0179	1.12665
Meta-testing cohort 1_47	GSM814357	2.51048
Meta-testing cohort 1_470	TCGA_UY_A9PH	2.19813
Meta-testing cohort 1_470	TCGA_UY_A9PH	2.19813
Meta-testing cohort 1_471	TCGA_XF_AAMG	2.26863
Meta-testing cohort 1_471	TCGA_XF_AAMG	2.26863
Meta-testing cohort 1_472	U0046	1.15702
Meta-testing cohort 1_473	U1301	1.51551
Meta-testing cohort 1_475	TCGA_SY_A9G5	2.80214
Meta-testing cohort 1_475	TCGA_SY_A9G5	2.80214
Meta-testing cohort 1_480	TCGA_XF_AAMQ	1.78205
Meta-testing cohort 1_480	TCGA_XF_AAMQ	1.78205
Meta-testing cohort 1_482	U0130	0.56311
Meta-testing cohort 1_483	GSM340682	1.85804
Meta-testing cohort 1_485	GSM806924	1.22817
Meta-testing cohort 1_486	U0118	0.538963
Meta-testing cohort 1_487	GSM340698.y	1.6953
Meta-testing cohort 1_488	TCGA_FD_A6TG	3.4022
Meta-testing cohort 1_488	TCGA_FD_A6TG	3.4022
Meta-testing cohort 1_49	TCGA_5N_A9KI	2.89729
Meta-testing cohort 1_49	TCGA_5N_A9KI	2.89729
Meta-testing cohort 1_490	BLCA_Cx_240	2.55567
Meta-testing cohort 1_491	U0904	0.925677
Meta-testing cohort 1_492	BLCA_Nac_87	1.67301
Meta-testing cohort 1_493	TCGA_ZF_A9R0	2.97878
Meta-testing cohort 1_493	TCGA_ZF_A9R0	2.97878
Meta-testing cohort 1_497	TCGA_ZF_AA4N	2.39777
Meta-testing cohort 1_497	TCGA_ZF_AA4N	2.39777
Meta-testing cohort 1_5	GSM2301842	2.44914
Meta-testing cohort 1_50	TCGA_CF_A3MH	2.30698
Meta-testing cohort 1_50	TCGA_CF_A3MH	2.30698
Meta-testing cohort 1_500	GSM786517	1.15368
Meta-testing cohort 1_501	BLCA_Cx_247	2.55787
Meta-testing cohort 1_502	GSM340751.y	1.29871
Meta-testing cohort 1_503	TCGA_BT_A42F	2.96537
Meta-testing cohort 1_503	TCGA_BT_A42F	2.96537
Meta-testing cohort 1_504	TCGA_FD_A3B3	2.84195
Meta-testing cohort 1_504	TCGA_FD_A3B3	2.84195
Meta-testing cohort 1_505	U0458	0.468448
Meta-testing cohort 1_506	GSM2301884	2.31224
Meta-testing cohort 1_507	TCGA_CF_A8HX	1.77062
Meta-testing cohort 1_507	TCGA_CF_A8HX	1.77062
Meta-testing cohort 1_508	GSM340611.y	1.90798
Meta-testing cohort 1_51	GSM806898	2.19853
Meta-testing cohort 1_511	TCGA_E7_A5KE	2.13117
Meta-testing cohort 1_511	TCGA_E7_A5KE	2.13117
Meta-testing cohort 1_513	TCGA_GC_A3BM	2.23517
Meta-testing cohort 1_513	TCGA_GC_A3BM	2.23517
Meta-testing cohort 1_514	TCGA_YF_AA3L	1.66131
Meta-testing cohort 1_514	TCGA_YF_AA3L	1.66131
Meta-testing cohort 1_518	TCGA_GU_A766	2.03188
Meta-testing cohort 1_518	TCGA_GU_A766	2.03188
Meta-testing cohort 1_519	TCGA_CF_A1HS	3.00801
Meta-testing cohort 1_519	TCGA_CF_A1HS	3.00801
Meta-testing cohort 1_520	GSM340617	1.58221
Meta-testing cohort 1_522	GSM806912	1.03255
Meta-testing cohort 1_527	GSM340666	1.33698
Meta-testing cohort 1_528	BLCA_Nac_288	2.86001
Meta-testing cohort 1_529	U0558	0.562744
Meta-testing cohort 1_531	GSM814193	1.31573
Meta-testing cohort 1_533	GSM814131	1.22305
Meta-testing cohort 1_534	GSM806916	2.17474
Meta-testing cohort 1_536	U0977	1.04291
Meta-testing cohort 1_537	GSM786565	1.07805
Meta-testing cohort 1_538	GSM814343	1.376
Meta-testing cohort 1_539	GSM340746	2.52561
Meta-testing cohort 1_54	GSM2301862	2.28503
Meta-testing cohort 1_540	GSM814231	1.34374
Meta-testing cohort 1_542	GSM3699762	0.919638
Meta-testing cohort 1_543	TCGA_G2_A3IB	2.30698
Meta-testing cohort 1_543	TCGA_G2_A3IB	2.30698
Meta-testing cohort 1_544	BLCA_Cx_268	2.93184
Meta-testing cohort 1_545	FR_259_U133_2.CEL	2.13558
Meta-testing cohort 1_546	U0965	1.00408
Meta-testing cohort 1_547	U1207	1.648
Meta-testing cohort 1_549	GSM806933	2.59266
Meta-testing cohort 1_551	U1106	0.978145
Meta-testing cohort 1_552	U1233	1.60514
Meta-testing cohort 1_553	U1256	0.908324
Meta-testing cohort 1_554	GSM340692	1.06186
Meta-testing cohort 1_555	GSM3699746	0.593172
Meta-testing cohort 1_556	GSM814156	0.969517
Meta-testing cohort 1_559	GSM786557	2.92717
Meta-testing cohort 1_56	GSM340703	0.503918
Meta-testing cohort 1_560	GSM2454218	0.609036
Meta-testing cohort 1_561	GSM2301776	1.87189
Meta-testing cohort 1_562	U1337	1.18386
Meta-testing cohort 1_563	GSM3699759	1.12305
Meta-testing cohort 1_564	BLCA_Nac_201	2.81369
Meta-testing cohort 1_566	GSM340689.y	1.55373
Meta-testing cohort 1_567	FR_44_U133_2.CEL	2.45754
Meta-testing cohort 1_569	U0642	0.96509
Meta-testing cohort 1_57	U0772	0.476888
Meta-testing cohort 1_572	U0036	0.524397
Meta-testing cohort 1_573	U0392	0.951962
Meta-testing cohort 1_576	U0091	1.02896
Meta-testing cohort 1_577	U0200	0.514939
Meta-testing cohort 1_578	GSM786514	2.34291
Meta-testing cohort 1_579	U1212	0.515412
Meta-testing cohort 1_58	U0383	1.24921
Meta-testing cohort 1_581	GSM340676	1.08945
Meta-testing cohort 1_582	GSM2301787	2.26395
Meta-testing cohort 1_586	GSM814142	1.73703
Meta-testing cohort 1_587	GSM814249	1.18501
Meta-testing cohort 1_588	U0573	1.28171
Meta-testing cohort 1_59	TCGA_XF_A9SM	2.72477
Meta-testing cohort 1_59	TCGA_XF_A9SM	2.72477
Meta-testing cohort 1_590	GSM2301797	1.45001
Meta-testing cohort 1_591	U0141	0.624927
Meta-testing cohort 1_592	TCGA_XF_AAN0	3.51514
Meta-testing cohort 1_592	TCGA_XF_AAN0	3.51514
Meta-testing cohort 1_595	GSM2301863	2.82885
Meta-testing cohort 1_596	GSM814230	0.538963
Meta-testing cohort 1_597	U1272	0.443813
Meta-testing cohort 1_598	GSM814254	2.3745
Meta-testing cohort 1_6	GSM2454227	0.703697
Meta-testing cohort 1_60	BLCA_Nac_53	1.96473
Meta-testing cohort 1_602	GSM814136	0.944709
Meta-testing cohort 1_604	GSM814075	1.55373
Meta-testing cohort 1_606	GSM340641	1.1636
Meta-testing cohort 1_607	TCGA_GD_A6C6	2.23557
Meta-testing cohort 1_607	TCGA_GD_A6C6	2.23557
Meta-testing cohort 1_608	TCGA_DK_AA6X	1.85144
Meta-testing cohort 1_608	TCGA_DK_AA6X	1.85144
Meta-testing cohort 1_609	BLCA_Nac_31	1.76333
Meta-testing cohort 1_61	GSM786501	1.66925
Meta-testing cohort 1_610	TCGA_XF_A9SL	3.59123
Meta-testing cohort 1_610	TCGA_XF_A9SL	3.59123
Meta-testing cohort 1_611	GSM814192	0.538503
Meta-testing cohort 1_612	BLCA_Cx_262	3.09257
Meta-testing cohort 1_613	GSM814318	1.09244
Meta-testing cohort 1_614	GSM806867	1.22305
Meta-testing cohort 1_615	BLCA_Nac_45	3.15343
Meta-testing cohort 1_616	GSM2301871	3.37794
Meta-testing cohort 1_618	GSM814351	0.588454
Meta-testing cohort 1_619	TCGA_UY_A78K	2.94675
Meta-testing cohort 1_619	TCGA_UY_A78K	2.94675
Meta-testing cohort 1_62	U0290	1.40732
Meta-testing cohort 1_621	GSM814135	0.635129
Meta-testing cohort 1_623	BLCA_Nac_127	2.86675
Meta-testing cohort 1_626	U0431	1.50925
Meta-testing cohort 1_627	U0476	1.53849
Meta-testing cohort 1_628	U0638	0.94353
Meta-testing cohort 1_629	U0954	0.962172
Meta-testing cohort 1_63	TCGA_SY_A9G0	3.8933
Meta-testing cohort 1_63	TCGA_SY_A9G0	3.8933
Meta-testing cohort 1_632	BLCA_Nac_125	3.58246
Meta-testing cohort 1_635	U0184	0.909869
Meta-testing cohort 1_636	U0832	0.691458
Meta-testing cohort 1_637	U0045	0.945029
Meta-testing cohort 1_639	U0623	1.19845
Meta-testing cohort 1_640	GSM3699789	1.02152
Meta-testing cohort 1_644	GSM2301906	1.50226
Meta-testing cohort 1_645	U0515	1.08634
Meta-testing cohort 1_647	U1304	1.47849
Meta-testing cohort 1_649	GSM340711	1.52607
Meta-testing cohort 1_650	GSM814102	1.00752
Meta-testing cohort 1_651	GSM806828	1.06315
Meta-testing cohort 1_653	U0766	0.910939
Meta-testing cohort 1_656	BLCA_Nac_94	2.15449
Meta-testing cohort 1_657	TCGA_FD_A3B4	2.59879
Meta-testing cohort 1_657	TCGA_FD_A3B4	2.59879
Meta-testing cohort 1_658	GSM340619.y	1.61304
Meta-testing cohort 1_663	U0329	1.02211
Meta-testing cohort 1_665	U1002	0.926137
Meta-testing cohort 1_666	U0912	0.995632
Meta-testing cohort 1_67	GSM814172	2.04672
Meta-testing cohort 1_670	GSM806856	1.74754
Meta-testing cohort 1_671	TCGA_ZF_A9RF	2.23016
Meta-testing cohort 1_671	TCGA_ZF_A9RF	2.23016
Meta-testing cohort 1_672	BLCA_Nac_113	2.30698
Meta-testing cohort 1_673	U0059	0.691458
Meta-testing cohort 1_675	U1343	1.53772
Meta-testing cohort 1_677	TCGA_XF_A9SJ	3.38
Meta-testing cohort 1_677	TCGA_XF_A9SJ	3.38
Meta-testing cohort 1_68	U0011	0.972619
Meta-testing cohort 1_683	GSM2301889	2.29059
Meta-testing cohort 1_684	TCGA_DK_A3IN	3.00801
Meta-testing cohort 1_684	TCGA_DK_A3IN	3.00801
Meta-testing cohort 1_686	U0608	1.61332
Meta-testing cohort 1_687	U0459	1.28171
Meta-testing cohort 1_690	TCGA_BT_A20R	3.3746
Meta-testing cohort 1_690	TCGA_BT_A20R	3.3746
Meta-testing cohort 1_691	GSM340667.x	1.11824
Meta-testing cohort 1_692	GSM340733	1.8224
Meta-testing cohort 1_694	U1100	0.896068
Meta-testing cohort 1_695	GSM814059	1.78078
Meta-testing cohort 1_697	U0032	0.504124
Meta-testing cohort 1_7	TCGA_S5_A6DX	3.27225
Meta-testing cohort 1_7	TCGA_S5_A6DX	3.27225
Meta-testing cohort 1_70	GSM340678	2.97005
Meta-testing cohort 1_701	U0120	1.05159
Meta-testing cohort 1_703	U0346	1.2159
Meta-testing cohort 1_707	U0611	0.544564
Meta-testing cohort 1_708	FR_267_U133_2.CEL	2.18234
Meta-testing cohort 1_709	GSM806889	1.52744
Meta-testing cohort 1_71	GSM786528	2.9285
Meta-testing cohort 1_710	GSM786525	2.99152
Meta-testing cohort 1_711	U0779	0.955631
Meta-testing cohort 1_712	BLCA_Nac_269	2.82433
Meta-testing cohort 1_713	U0847	0.579863
Meta-testing cohort 1_714	GSM2301838	3.60013
Meta-testing cohort 1_715	GSM2301859	0.722623
Meta-testing cohort 1_716	U0001	0.972619
Meta-testing cohort 1_718	GSM340736.x	1.73022
Meta-testing cohort 1_719	BLCA_Nac_58	1.94746
Meta-testing cohort 1_72	GSM340629	1.82732
Meta-testing cohort 1_721	TCGA_DK_AA6S	2.32505
Meta-testing cohort 1_721	TCGA_DK_AA6S	2.32505
Meta-testing cohort 1_722	TCGA_G2_AA3C	3.62484
Meta-testing cohort 1_722	TCGA_G2_AA3C	3.62484
Meta-testing cohort 1_724	GSM2454239	0.881584
Meta-testing cohort 1_726	GSM2301865	2.4707
Meta-testing cohort 1_727	BLCA_Nac_32	2.43031
Meta-testing cohort 1_728	GSM2301820	1.04913
Meta-testing cohort 1_73	FR_138_U133_2.CEL	2.80265
Meta-testing cohort 1_730	GSM814165	1.47085
Meta-testing cohort 1_731	TCGA_DK_A6B6	1.66946
Meta-testing cohort 1_731	TCGA_DK_A6B6	1.66946
Meta-testing cohort 1_732	FR_79_U133_2.CEL	2.06452
Meta-testing cohort 1_733	TCGA_FD_A5C0	2.98196
Meta-testing cohort 1_733	TCGA_FD_A5C0	2.98196
Meta-testing cohort 1_734	GSM2454211	0.972619
Meta-testing cohort 1_735	GSM2301839	1.10295
Meta-testing cohort 1_737	GSM814052	1.72065
Meta-testing cohort 1_739	GSM814228	0.704419
Meta-testing cohort 1_74	GSM806890	1.12553
Meta-testing cohort 1_740	GSM806910	1.13321
Meta-testing cohort 1_742	TCGA_E7_A6MF	1.74291
Meta-testing cohort 1_742	TCGA_E7_A6MF	1.74291
Meta-testing cohort 1_743	TCGA_G2_A3IE	1.69929
Meta-testing cohort 1_743	TCGA_G2_A3IE	1.69929
Meta-testing cohort 1_744	U0109	1.68548
Meta-testing cohort 1_746	U0053	0.990898
Meta-testing cohort 1_748	U0332	0.549351
Meta-testing cohort 1_749	GSM340638.y	1.56074
Meta-testing cohort 1_75	GSM814077	1.92492
Meta-testing cohort 1_750	GSM814186	1.64221
Meta-testing cohort 1_752	BLCA_Nac_116	2.99398
Meta-testing cohort 1_753	BLCA_Nac_50	2.39053
Meta-testing cohort 1_755	GSM2301846	2.70059
Meta-testing cohort 1_757	GSM806847	0.950778
Meta-testing cohort 1_758	GSM814153	1.06542
Meta-testing cohort 1_759	U0115	0.970776
Meta-testing cohort 1_761	TCGA_GC_A6I3	3.41704
Meta-testing cohort 1_761	TCGA_GC_A6I3	3.41704
Meta-testing cohort 1_762	U1037	1.59767
Meta-testing cohort 1_763	TCGA_4Z_AA7S	2.82
Meta-testing cohort 1_763	TCGA_4Z_AA7S	2.82
Meta-testing cohort 1_764	BLCA_Nac_24	2.89792
Meta-testing cohort 1_765	TCGA_BL_A0C8	1.60069
Meta-testing cohort 1_765	TCGA_BL_A0C8	1.60069
Meta-testing cohort 1_766	GSM340721	2.5956
Meta-testing cohort 1_767	GSM2301812	1.37497
Meta-testing cohort 1_768	GSM340737	1.17265
Meta-testing cohort 1_769	FR_262_U133_2.CEL	2.42549
Meta-testing cohort 1_770	U0121	0.940882
Meta-testing cohort 1_774	TCGA_BT_A2LA	2.39245
Meta-testing cohort 1_774	TCGA_BT_A2LA	2.39245
Meta-testing cohort 1_775	GSM2301818	1.00791
Meta-testing cohort 1_776	GSM3699765	0.994699
Meta-testing cohort 1_777	TCGA_K4_A5RH	2.83125
Meta-testing cohort 1_777	TCGA_K4_A5RH	2.83125
Meta-testing cohort 1_778	GSM814246	1.69409
Meta-testing cohort 1_78	FR_12_U133_2.CEL	2.74127
Meta-testing cohort 1_782	U0139	1.35862
Meta-testing cohort 1_783	U1249	1.49099
Meta-testing cohort 1_79	U0559	1.08137
Meta-testing cohort 1_81	TCGA_CF_A9FF	1.70956
Meta-testing cohort 1_81	TCGA_CF_A9FF	1.70956
Meta-testing cohort 1_82	BLCA_Cx_123	2.17277
Meta-testing cohort 1_87	GSM340695	1.42935
Meta-testing cohort 1_88	FR_39_U133_2_2.CEL	1.73102
Meta-testing cohort 1_89	GSM340717	1.1043
Meta-testing cohort 1_90	U1240	1.67108
Meta-testing cohort 1_91	GSM340765	2.5364
Meta-testing cohort 1_93	U0439	0.935234
Meta-testing cohort 1_94	GSM340669	1.18713
Meta-testing cohort 1_95	GSM340666.y	1.13944
Meta-testing cohort 1_96	BLCA_Nac_55	2.85112
Meta-testing cohort 1_97	TCGA_G2_AA3B	2.06144
Meta-testing cohort 1_97	TCGA_G2_AA3B	2.06144
Meta-testing cohort 1_98	GSM340663	1.70265
Meta-testing cohort 1_99	TCGA_DK_A2I1	2.25101
Meta-testing cohort 1_99	TCGA_DK_A2I1	2.25101
Meta-testing cohort 2_1	GSM340742.x	1.29697
Meta-testing cohort 2_10	GSM806908	1.13807
Meta-testing cohort 2_101	TCGA_E7_A3X6	2.11923
Meta-testing cohort 2_101	TCGA_E7_A3X6	2.11923
Meta-testing cohort 2_102	TCGA_GU_AATP	3.65657
Meta-testing cohort 2_102	TCGA_GU_AATP	3.65657
Meta-testing cohort 2_103	BLCA_Nac_59	2.90738
Meta-testing cohort 2_104	TCGA_R3_A69X	2.94203
Meta-testing cohort 2_104	TCGA_R3_A69X	2.94203
Meta-testing cohort 2_105	TCGA_FD_A5BX	3.58026
Meta-testing cohort 2_105	TCGA_FD_A5BX	3.58026
Meta-testing cohort 2_106	TCGA_KQ_A41Q	2.70533
Meta-testing cohort 2_106	TCGA_KQ_A41Q	2.70533
Meta-testing cohort 2_107	U0190	1.08438
Meta-testing cohort 2_108	GSM806838	1.13735
Meta-testing cohort 2_109	U0768	0.504982
Meta-testing cohort 2_11	U0446	1.04742
Meta-testing cohort 2_111	GSM2454223	0.644659
Meta-testing cohort 2_112	GSM340647	1.17251
Meta-testing cohort 2_114	GSM814055	2.56589
Meta-testing cohort 2_118	TCGA_K4_A54R	1.80151
Meta-testing cohort 2_118	TCGA_K4_A54R	1.80151
Meta-testing cohort 2_119	TCGA_BT_A20W	2.23517
Meta-testing cohort 2_119	TCGA_BT_A20W	2.23517
Meta-testing cohort 2_12	U1480	1.71581
Meta-testing cohort 2_120	GSM814203	0.588454
Meta-testing cohort 2_124	U1099	1.58625
Meta-testing cohort 2_125	TCGA_FD_A3SR	3.41053
Meta-testing cohort 2_125	TCGA_FD_A3SR	3.41053
Meta-testing cohort 2_128	GSM786530	2.77718
Meta-testing cohort 2_129	GSM2301881	2.82419
Meta-testing cohort 2_130	GSM2301873	3.1548
Meta-testing cohort 2_132	BLCA_Nac_9	2.4765
Meta-testing cohort 2_134	GSM814198	1.28239
Meta-testing cohort 2_135	TCGA_ZF_A9RM	2.29768
Meta-testing cohort 2_135	TCGA_ZF_A9RM	2.29768
Meta-testing cohort 2_136	U0177	0.569972
Meta-testing cohort 2_139	TCGA_PQ_A6FN	3.01184
Meta-testing cohort 2_139	TCGA_PQ_A6FN	3.01184
Meta-testing cohort 2_14	GSM340636	2.12754
Meta-testing cohort 2_140	TCGA_XF_A9T2	2.53837
Meta-testing cohort 2_140	TCGA_XF_A9T2	2.53837
Meta-testing cohort 2_141	GSM340690	1.48288
Meta-testing cohort 2_143	U0454	0.924589
Meta-testing cohort 2_144	GSM786494	2.49485
Meta-testing cohort 2_147	TCGA_DK_A6B0	1.66366
Meta-testing cohort 2_147	TCGA_DK_A6B0	1.66366
Meta-testing cohort 2_15	GSM806816	1.02211
Meta-testing cohort 2_151	GSM340720	2.23282
Meta-testing cohort 2_152	U0555	0.494294
Meta-testing cohort 2_155	U0598	1.487
Meta-testing cohort 2_156	GSM786540	2.53552
Meta-testing cohort 2_158	GSM806905	1.05594
Meta-testing cohort 2_16	TCGA_LT_A5Z6	1.66279
Meta-testing cohort 2_16	TCGA_LT_A5Z6	1.66279
Meta-testing cohort 2_163	FR_99_U133_2.CEL	2.36126
Meta-testing cohort 2_164	GSM2301861	3.1853
Meta-testing cohort 2_166	GSM2301791	2.94578
Meta-testing cohort 2_167	GSM814091	1.31573
Meta-testing cohort 2_17	GSM806813	0.744368
Meta-testing cohort 2_170	FR_84_U133_2.CEL	2.87814
Meta-testing cohort 2_171	U1265	0.87981
Meta-testing cohort 2_172	BLCA_Cx_201	2.71381
Meta-testing cohort 2_174	GSM340723	3.22112
Meta-testing cohort 2_175	GSM814241	2.20186
Meta-testing cohort 2_177	TCGA_K4_A6FZ	2.87545
Meta-testing cohort 2_177	TCGA_K4_A6FZ	2.87545
Meta-testing cohort 2_178	GSM814094	1.99186
Meta-testing cohort 2_179	TCGA_ZF_A9RE	2.49891
Meta-testing cohort 2_179	TCGA_ZF_A9RE	2.49891
Meta-testing cohort 2_18	GSM814090	1.89801
Meta-testing cohort 2_180	U0963	2.84369
Meta-testing cohort 2_182	U0583	0.945029
Meta-testing cohort 2_183	BLCA_Nac_14	2.26395
Meta-testing cohort 2_184	BLCA_Nac_90	2.83606
Meta-testing cohort 2_185	BLCA_Nac_38	2.30555
Meta-testing cohort 2_186	GSM2454222	1.05594
Meta-testing cohort 2_187	GSM2454217	0.997811
Meta-testing cohort 2_188	GSM2301887	2.85168
Meta-testing cohort 2_19	GSM806825	1.03082
Meta-testing cohort 2_190	GSM3699784	1.48461
Meta-testing cohort 2_192	GSM814287	2.14947
Meta-testing cohort 2_193	TCGA_GV_A3JX	2.58012
Meta-testing cohort 2_193	TCGA_GV_A3JX	2.58012
Meta-testing cohort 2_194	U0080	0.519037
Meta-testing cohort 2_196	GSM814107	1.29846
Meta-testing cohort 2_197	GSM814265	1.71244
Meta-testing cohort 2_200	U0844	0.589379
Meta-testing cohort 2_204	FR_179_U133_2.CEL	2.81053
Meta-testing cohort 2_206	U0587	0.589379
Meta-testing cohort 2_207	GSM2454212	0.802729
Meta-testing cohort 2_208	TCGA_ZF_A9RN	2.71916
Meta-testing cohort 2_208	TCGA_ZF_A9RN	2.71916
Meta-testing cohort 2_209	U0907	1.55967
Meta-testing cohort 2_21	TCGA_FJ_A871	2.56502
Meta-testing cohort 2_21	TCGA_FJ_A871	2.56502
Meta-testing cohort 2_210	TCGA_BT_A3PH	3.90152
Meta-testing cohort 2_210	TCGA_BT_A3PH	3.90152
Meta-testing cohort 2_211	TCGA_E7_A97Q	3.20347
Meta-testing cohort 2_211	TCGA_E7_A97Q	3.20347
Meta-testing cohort 2_212	GSM2301833	1.13969
Meta-testing cohort 2_215	GSM786548	2.26019
Meta-testing cohort 2_216	GSM2301850	3.22282
Meta-testing cohort 2_217	BLCA_Cx_73	2.66747
Meta-testing cohort 2_219	GSM2454228	1.06788
Meta-testing cohort 2_220	BLCA_Nac_92	2.8261
Meta-testing cohort 2_222	FR_36_U133_2_2.CEL	1.67029
Meta-testing cohort 2_223	GSM786570	2.77489
Meta-testing cohort 2_224	TCGA_XF_A9SP	2.53552
Meta-testing cohort 2_224	TCGA_XF_A9SP	2.53552
Meta-testing cohort 2_225	U0037	1.00376
Meta-testing cohort 2_226	GSM2301840	0.593915
Meta-testing cohort 2_228	U0590	0.905231
Meta-testing cohort 2_229	TCGA_DK_A1AE	2.83428
Meta-testing cohort 2_229	TCGA_DK_A1AE	2.83428
Meta-testing cohort 2_23	GSM806866	1.61304
Meta-testing cohort 2_231	GSM814109	2.14415
Meta-testing cohort 2_232	GSM2301883	3.50561
Meta-testing cohort 2_234	U0754	0.481788
Meta-testing cohort 2_235	U0973	0.894085
Meta-testing cohort 2_238	TCGA_BT_A20O	2.74067
Meta-testing cohort 2_238	TCGA_BT_A20O	2.74067
Meta-testing cohort 2_239	BLCA_Cx_101	2.49485
Meta-testing cohort 2_24	GSM814293	1.59649
Meta-testing cohort 2_240	GSM814181	1.60891
Meta-testing cohort 2_242	GSM340701	2.38108
Meta-testing cohort 2_243	U1280	0.512015
Meta-testing cohort 2_244	FR_97_U133_2_2.CEL	2.80356
Meta-testing cohort 2_247	U0119	1.11581
Meta-testing cohort 2_248	U1211	2.74542
Meta-testing cohort 2_254	U0855	1.59003
Meta-testing cohort 2_255	TCGA_YC_A9TC	3.271
Meta-testing cohort 2_255	TCGA_YC_A9TC	3.271
Meta-testing cohort 2_256	GSM814195	2.51717
Meta-testing cohort 2_258	U1179	1.64687
Meta-testing cohort 2_259	TCGA_CF_A5U8	1.73392
Meta-testing cohort 2_259	TCGA_CF_A5U8	1.73392
Meta-testing cohort 2_26	FR_242_U133_2.CEL	2.63342
Meta-testing cohort 2_261	U0344	0.924817
Meta-testing cohort 2_262	U0183	1.49721
Meta-testing cohort 2_263	U1011	0.497418
Meta-testing cohort 2_265	GSM2301814	2.27009
Meta-testing cohort 2_266	BLCA_Nac_91	1.76461
Meta-testing cohort 2_267	GSM806826	2.16346
Meta-testing cohort 2_268	GSM340732	2.94738
Meta-testing cohort 2_269	TCGA_CF_A47W	1.66416
Meta-testing cohort 2_269	TCGA_CF_A47W	1.66416
Meta-testing cohort 2_27	U0433	1.38488
Meta-testing cohort 2_271	GSM340767	2.52561
Meta-testing cohort 2_272	GSM2301855	1.5479
Meta-testing cohort 2_274	TCGA_ZF_A9R4	2.23811
Meta-testing cohort 2_274	TCGA_ZF_A9R4	2.23811
Meta-testing cohort 2_275	FR_127_U133_2_2.CEL	2.37731
Meta-testing cohort 2_278	GSM3699767	0.504558
Meta-testing cohort 2_279	GSM814202	2.11426
Meta-testing cohort 2_281	BLCA_Nac_57	2.1578
Meta-testing cohort 2_284	GSM340691.y	1.2582
Meta-testing cohort 2_287	TCGA_E7_A678	2.25427
Meta-testing cohort 2_287	TCGA_E7_A678	2.25427
Meta-testing cohort 2_288	U0538	1.06714
Meta-testing cohort 2_29	U1403	0.471304
Meta-testing cohort 2_290	GSM340719.y	1.29463
Meta-testing cohort 2_291	BLCA_Nac_95	1.96693
Meta-testing cohort 2_293	U1412	0.612572
Meta-testing cohort 2_295	TCGA_DK_AA6W	2.47614
Meta-testing cohort 2_295	TCGA_DK_AA6W	2.47614
Meta-testing cohort 2_296	GSM340698	2.08774
Meta-testing cohort 2_298	FR_252_U133_2.CEL	1.87444
Meta-testing cohort 2_3	GSM814134	0.947025
Meta-testing cohort 2_300	U1305	0.474393
Meta-testing cohort 2_301	GSM806818	1.17988
Meta-testing cohort 2_302	U0915	0.504994
Meta-testing cohort 2_304	U1297	0.945029
Meta-testing cohort 2_305	TCGA_UY_A78O	2.37728
Meta-testing cohort 2_305	TCGA_UY_A78O	2.37728
Meta-testing cohort 2_308	GSM806872	2.50285
Meta-testing cohort 2_309	TCGA_2F_A9KT	2.50919
Meta-testing cohort 2_309	TCGA_2F_A9KT	2.50919
Meta-testing cohort 2_310	GSM340694	2.24045
Meta-testing cohort 2_312	TCGA_4Z_AA83	1.85767
Meta-testing cohort 2_312	TCGA_4Z_AA83	1.85767
Meta-testing cohort 2_313	GSM814201	1.06833
Meta-testing cohort 2_315	GSM814057	1.61851
Meta-testing cohort 2_317	TCGA_GD_A2C5	2.98338
Meta-testing cohort 2_317	TCGA_GD_A2C5	2.98338
Meta-testing cohort 2_318	TCGA_XF_AAN5	2.50314
Meta-testing cohort 2_318	TCGA_XF_AAN5	2.50314
Meta-testing cohort 2_32	BLCA_Cx_156	2.71797
Meta-testing cohort 2_320	GSM814261	1.02254
Meta-testing cohort 2_321	TCGA_XF_A9SW	3.55302
Meta-testing cohort 2_321	TCGA_XF_A9SW	3.55302
Meta-testing cohort 2_322	GSM2301830	2.38828
Meta-testing cohort 2_323	GSM2301851	0.915528
Meta-testing cohort 2_324	GSM806874	1.29463
Meta-testing cohort 2_325	TCGA_GV_A3JW	2.30555
Meta-testing cohort 2_325	TCGA_GV_A3JW	2.30555
Meta-testing cohort 2_326	GSM814112	1.01352
Meta-testing cohort 2_328	U0067	1.74663
Meta-testing cohort 2_329	U0615	0.900276
Meta-testing cohort 2_330	TCGA_FD_A3B7	2.92108
Meta-testing cohort 2_330	TCGA_FD_A3B7	2.92108
Meta-testing cohort 2_332	GSM340699	1.52834
Meta-testing cohort 2_335	U1231	0.454637
Meta-testing cohort 2_336	U0330	0.977139
Meta-testing cohort 2_338	GSM340646.y	1.80863
Meta-testing cohort 2_34	TCGA_ZF_A9RL	1.7891
Meta-testing cohort 2_34	TCGA_ZF_A9RL	1.7891
Meta-testing cohort 2_342	GSM340608.y	1.55197
Meta-testing cohort 2_343	BLCA_Cx_204	2.95482
Meta-testing cohort 2_344	GSM814307	0.722041
Meta-testing cohort 2_345	GSM814308	0.983037
Meta-testing cohort 2_346	GSM786581	2.37728
Meta-testing cohort 2_347	GSM806808	0.956448
Meta-testing cohort 2_348	TCGA_HQ_A2OF	2.46283
Meta-testing cohort 2_348	TCGA_HQ_A2OF	2.46283
Meta-testing cohort 2_349	GSM814212	1.13807
Meta-testing cohort 2_350	U0553	1.51263
Meta-testing cohort 2_353	GSM340624	1.56626
Meta-testing cohort 2_354	U0204	0.526532
Meta-testing cohort 2_355	U1248	0.456553
Meta-testing cohort 2_357	GSM2301805	0.722041
Meta-testing cohort 2_358	TCGA_YC_A89H	2.24975
Meta-testing cohort 2_358	TCGA_YC_A89H	2.24975
Meta-testing cohort 2_36	GSM340754.y	1.2227
Meta-testing cohort 2_363	TCGA_FD_A43Y	2.93016
Meta-testing cohort 2_363	TCGA_FD_A43Y	2.93016
Meta-testing cohort 2_364	TCGA_FD_A3B8	1.87606
Meta-testing cohort 2_364	TCGA_FD_A3B8	1.87606
Meta-testing cohort 2_366	U0624	1.266
Meta-testing cohort 2_367	U0655	1.10012
Meta-testing cohort 2_37	TCGA_DK_A6B2	3.46287
Meta-testing cohort 2_37	TCGA_DK_A6B2	3.46287
Meta-testing cohort 2_371	GSM340764	2.45496
Meta-testing cohort 2_372	BLCA_Nac_25	2.35574
Meta-testing cohort 2_374	GSM814286	1.57567
Meta-testing cohort 2_375	GSM340749.y	1.16168
Meta-testing cohort 2_376	FR_254_U133_2.CEL	2.43136
Meta-testing cohort 2_378	GSM2454210	0.971973
Meta-testing cohort 2_379	BLCA_Nac_26	2.30076
Meta-testing cohort 2_38	TCGA_GD_A3OP	3.41704
Meta-testing cohort 2_38	TCGA_GD_A3OP	3.41704
Meta-testing cohort 2_381	GSM814354	2.46553
Meta-testing cohort 2_383	TCGA_GU_A764	2.41275
Meta-testing cohort 2_383	TCGA_GU_A764	2.41275
Meta-testing cohort 2_384	TCGA_DK_A3WW	2.33592
Meta-testing cohort 2_384	TCGA_DK_A3WW	2.33592
Meta-testing cohort 2_386	GSM786559	1.61791
Meta-testing cohort 2_387	U0839	1.31704
Meta-testing cohort 2_389	GSM814226	0.545524
Meta-testing cohort 2_39	U0328	0.938781
Meta-testing cohort 2_390	GSM814266	0.536625
Meta-testing cohort 2_391	U1150	0.609321
Meta-testing cohort 2_392	GSM2301877	2.4765
Meta-testing cohort 2_393	GSM814297	0.981554
Meta-testing cohort 2_395	U0560	0.490437
Meta-testing cohort 2_396	FR_106_U133_2.CEL	2.49238
Meta-testing cohort 2_399	U0126	0.990999
Meta-testing cohort 2_401	BLCA_Cx_244	2.71808
Meta-testing cohort 2_402	TCGA_GU_A42R	3.37026
Meta-testing cohort 2_402	TCGA_GU_A42R	3.37026
Meta-testing cohort 2_405	U0551	1.57249
Meta-testing cohort 2_406	BLCA_Nac_123	2.23156
Meta-testing cohort 2_409	GSM340685	1.56015
Meta-testing cohort 2_41	GSM340652.x	1.66981
Meta-testing cohort 2_410	GSM814196	1.1557
Meta-testing cohort 2_411	GSM786505	3.03245
Meta-testing cohort 2_412	U1206	1.03629
Meta-testing cohort 2_414	U0434	1.56934
Meta-testing cohort 2_417	GSM806921	1.7648
Meta-testing cohort 2_418	GSM2301900	2.75769
Meta-testing cohort 2_42	GSM2301828	0.984735
Meta-testing cohort 2_420	TCGA_CF_A27C	2.63342
Meta-testing cohort 2_420	TCGA_CF_A27C	2.63342
Meta-testing cohort 2_421	TCGA_GC_A3WC	2.8261
Meta-testing cohort 2_421	TCGA_GC_A3WC	2.8261
Meta-testing cohort 2_422	GSM3699749	0.997111
Meta-testing cohort 2_423	GSM340623	3.41094
Meta-testing cohort 2_427	GSM806836	1.12443
Meta-testing cohort 2_428	U1415	1.47733
Meta-testing cohort 2_429	TCGA_CF_A47Y	1.80473
Meta-testing cohort 2_429	TCGA_CF_A47Y	1.80473
Meta-testing cohort 2_43	TCGA_XF_A9SK	4.08911
Meta-testing cohort 2_43	TCGA_XF_A9SK	4.08911
Meta-testing cohort 2_430	BLCA_Nac_98	2.84866
Meta-testing cohort 2_432	GSM786531	3.74777
Meta-testing cohort 2_433	U0765	1.12691
Meta-testing cohort 2_434	GSM814170	1.74663
Meta-testing cohort 2_438	U0556	1.07456
Meta-testing cohort 2_44	GSM3699788	0.593915
Meta-testing cohort 2_440	GSM806893	1.66182
Meta-testing cohort 2_441	GSM340683.x	1.47432
Meta-testing cohort 2_442	TCGA_XF_A9SI	2.1506
Meta-testing cohort 2_442	TCGA_XF_A9SI	2.1506
Meta-testing cohort 2_444	BLCA_Nac_124	2.79183
Meta-testing cohort 2_445	GSM814118	0.508717
Meta-testing cohort 2_447	GSM814087	0.60776
Meta-testing cohort 2_449	GSM340750	1.18104
Meta-testing cohort 2_450	U0497	0.933615
Meta-testing cohort 2_451	GSM340751.x	1.28318
Meta-testing cohort 2_454	GSM806871	1.59267
Meta-testing cohort 2_455	TCGA_XF_A9T6	2.68352
Meta-testing cohort 2_455	TCGA_XF_A9T6	2.68352
Meta-testing cohort 2_456	U0181	1.13735
Meta-testing cohort 2_457	GSM814069	0.479534
Meta-testing cohort 2_458	GSM806922	1.68599
Meta-testing cohort 2_46	GSM806814	2.30972
Meta-testing cohort 2_460	GSM814117	1.70109
Meta-testing cohort 2_461	BLCA_Nac_109	2.71102
Meta-testing cohort 2_463	GSM814267	1.23958
Meta-testing cohort 2_464	GSM814138	3.09378
Meta-testing cohort 2_467	GSM340683.y	1.68684
Meta-testing cohort 2_468	GSM2301827	2.37069
Meta-testing cohort 2_469	GSM2301844	0.940882
Meta-testing cohort 2_470	GSM814280	1.59409
Meta-testing cohort 2_473	GSM340651	2.00466
Meta-testing cohort 2_475	U1396	1.49628
Meta-testing cohort 2_476	GSM786539	1.05102
Meta-testing cohort 2_477	BLCA_Nac_6	2.78193
Meta-testing cohort 2_479	BLCA_Nac_19	2.91088
Meta-testing cohort 2_48	GSM2454209	0.600912
Meta-testing cohort 2_480	TCGA_CF_A1HR	2.36551
Meta-testing cohort 2_480	TCGA_CF_A1HR	2.36551
Meta-testing cohort 2_481	U1006	1.08886
Meta-testing cohort 2_482	U0648	0.930095
Meta-testing cohort 2_483	U0427	0.958664
Meta-testing cohort 2_484	GSM340760	2.9905
Meta-testing cohort 2_489	FR_269_U133_2.CEL	2.74154
Meta-testing cohort 2_49	GSM340609	1.56686
Meta-testing cohort 2_490	U0709	1.76979
Meta-testing cohort 2_491	TCGA_DK_A3IU	1.80666
Meta-testing cohort 2_491	TCGA_DK_A3IU	1.80666
Meta-testing cohort 2_492	FR_15_U133_2.CEL	3.30521
Meta-testing cohort 2_493	U0219	0.970146
Meta-testing cohort 2_494	GSM814140	1.27309
Meta-testing cohort 2_495	GSM340686.y	1.51815
Meta-testing cohort 2_496	GSM814062	1.64938
Meta-testing cohort 2_497	BLCA_Nac_111	2.36126
Meta-testing cohort 2_498	TCGA_FD_A3SO	3.60351
Meta-testing cohort 2_498	TCGA_FD_A3SO	3.60351
Meta-testing cohort 2_499	GSM814174	0.928911
Meta-testing cohort 2_5	GSM814342	0.921607
Meta-testing cohort 2_50	GSM814084	1.06794
Meta-testing cohort 2_501	U0412	0.999323
Meta-testing cohort 2_502	TCGA_CU_A3YL	2.76839
Meta-testing cohort 2_502	TCGA_CU_A3YL	2.76839
Meta-testing cohort 2_503	GSM786499	1.90391
Meta-testing cohort 2_504	GSM340706	2.35574
Meta-testing cohort 2_505	GSM2301897	1.795
Meta-testing cohort 2_506	U1346	1.06788
Meta-testing cohort 2_508	U1303	0.566045
Meta-testing cohort 2_510	TCGA_DK_AA6R	3.68088
Meta-testing cohort 2_510	TCGA_DK_AA6R	3.68088
Meta-testing cohort 2_511	GSM340659.x	1.09807
Meta-testing cohort 2_515	GSM340660	1.9846
Meta-testing cohort 2_517	GSM340628	2.55886
Meta-testing cohort 2_519	TCGA_GV_A3JV	3.31621
Meta-testing cohort 2_519	TCGA_GV_A3JV	3.31621
Meta-testing cohort 2_52	BLCA_Nac_129	2.74832
Meta-testing cohort 2_520	GSM2454234	0.690771
Meta-testing cohort 2_521	TCGA_DK_A3IV	1.89801
Meta-testing cohort 2_521	TCGA_DK_A3IV	1.89801
Meta-testing cohort 2_524	BLCA_Nac_3	2.74605
Meta-testing cohort 2_525	BLCA_Nac_27	1.74891
Meta-testing cohort 2_527	U1277	1.01759
Meta-testing cohort 2_528	GSM2301822	1.28239
Meta-testing cohort 2_53	TCGA_E7_A7XN	2.90206
Meta-testing cohort 2_53	TCGA_E7_A7XN	2.90206
Meta-testing cohort 2_530	TCGA_BT_A0YX	2.791
Meta-testing cohort 2_530	TCGA_BT_A0YX	2.791
Meta-testing cohort 2_531	BLCA_Nac_138	1.96693
Meta-testing cohort 2_533	TCGA_GD_A3OS	2.16194
Meta-testing cohort 2_533	TCGA_GD_A3OS	2.16194
Meta-testing cohort 2_535	GSM340622	0.882074
Meta-testing cohort 2_536	TCGA_XF_AAN3	3.56384
Meta-testing cohort 2_536	TCGA_XF_AAN3	3.56384
Meta-testing cohort 2_538	GSM806833	1.06542
Meta-testing cohort 2_539	U1032	0.64503
Meta-testing cohort 2_54	BLCA_Nac_15	2.4286
Meta-testing cohort 2_540	GSM786538	2.47553
Meta-testing cohort 2_541	GSM814085	2.13383
Meta-testing cohort 2_543	U0199	0.487861
Meta-testing cohort 2_544	TCGA_XF_AAMW	3.65696
Meta-testing cohort 2_544	TCGA_XF_AAMW	3.65696
Meta-testing cohort 2_545	GSM2301849	0.704419
Meta-testing cohort 2_546	GSM814345	0.981554
Meta-testing cohort 2_547	GSM340632.x	1.36651
Meta-testing cohort 2_55	GSM340670	0.64489
Meta-testing cohort 2_550	U0600	0.938992
Meta-testing cohort 2_551	U0110	0.890768
Meta-testing cohort 2_552	GSM806848	1.02985
Meta-testing cohort 2_553	GSM814071	1.2605
Meta-testing cohort 2_554	GSM340632.y	1.18698
Meta-testing cohort 2_555	GSM786551	2.93016
Meta-testing cohort 2_556	GSM786510	2.41898
Meta-testing cohort 2_557	TCGA_2F_A9KO	3.01694
Meta-testing cohort 2_557	TCGA_2F_A9KO	3.01694
Meta-testing cohort 2_559	U1162	0.568428
Meta-testing cohort 2_560	U0089	1.19922
Meta-testing cohort 2_561	U1458	1.50103
Meta-testing cohort 2_563	TCGA_4Z_AA82	3.04804
Meta-testing cohort 2_563	TCGA_4Z_AA82	3.04804
Meta-testing cohort 2_564	GSM806930	1.32739
Meta-testing cohort 2_566	TCGA_UY_A8OC	3.56296
Meta-testing cohort 2_566	TCGA_UY_A8OC	3.56296
Meta-testing cohort 2_567	U0125	1.00376
Meta-testing cohort 2_568	GSM806844	1.22516
Meta-testing cohort 2_569	GSM786532	2.87569
Meta-testing cohort 2_57	GSM814072	1.83787
Meta-testing cohort 2_570	GSM806870	0.915443
Meta-testing cohort 2_572	U0641	0.966774
Meta-testing cohort 2_573	GSM340710.y	1.58717
Meta-testing cohort 2_574	U0606	1.56799
Meta-testing cohort 2_575	U1189	1.51573
Meta-testing cohort 2_577	BLCA_Nac_28	2.78703
Meta-testing cohort 2_578	GSM340673	1.82709
Meta-testing cohort 2_58	BLCA_Nac_103	2.80081
Meta-testing cohort 2_580	GSM786521	2.4765
Meta-testing cohort 2_581	GSM340645.x	1.71564
Meta-testing cohort 2_583	GSM340713.x	1.35365
Meta-testing cohort 2_585	U0093	1.16104
Meta-testing cohort 2_587	GSM2301894	3.32626
Meta-testing cohort 2_591	U1363	0.897736
Meta-testing cohort 2_592	TCGA_UY_A78P	2.1506
Meta-testing cohort 2_592	TCGA_UY_A78P	2.1506
Meta-testing cohort 2_594	FR_80_U133_2.CEL	2.97614
Meta-testing cohort 2_595	TCGA_ZF_AA5P	3.50111
Meta-testing cohort 2_595	TCGA_ZF_AA5P	3.50111
Meta-testing cohort 2_597	U0450	0.93736
Meta-testing cohort 2_598	U0140	0.93736
Meta-testing cohort 2_599	GSM814304	1.08721
Meta-testing cohort 2_60	GSM2301837	1.23105
Meta-testing cohort 2_600	U1188	1.67108
Meta-testing cohort 2_601	U0612	0.544227
Meta-testing cohort 2_602	GSM340698.x	1.71605
Meta-testing cohort 2_604	GSM806877	1.68992
Meta-testing cohort 2_605	GSM814276	0.542448
Meta-testing cohort 2_607	GSM814292	1.68039
Meta-testing cohort 2_608	GSM814333	1.12368
Meta-testing cohort 2_609	GSM814110	2.3511
Meta-testing cohort 2_61	GSM806920	2.06919
Meta-testing cohort 2_613	U1295	0.511374
Meta-testing cohort 2_614	GSM2301781	1.1557
Meta-testing cohort 2_615	BLCA_Nac_144	2.2908
Meta-testing cohort 2_616	GSM2301821	1.62451
Meta-testing cohort 2_617	GSM2301836	3.39528
Meta-testing cohort 2_618	GSM806817	1.55373
Meta-testing cohort 2_619	GSM3699752	1.17195
Meta-testing cohort 2_62	U0147	1.28171
Meta-testing cohort 2_621	U0408	0.970841
Meta-testing cohort 2_622	TCGA_DK_AA76	1.88704
Meta-testing cohort 2_622	TCGA_DK_AA76	1.88704
Meta-testing cohort 2_623	GSM814149	1.19726
Meta-testing cohort 2_624	TCGA_C4_A0F0	1.82152
Meta-testing cohort 2_624	TCGA_C4_A0F0	1.82152
Meta-testing cohort 2_626	GSM806859	1.02273
Meta-testing cohort 2_627	GSM3699776	0.517123
Meta-testing cohort 2_63	GSM340650.y	1.11956
Meta-testing cohort 2_630	TCGA_DK_A3IS	2.20398
Meta-testing cohort 2_630	TCGA_DK_A3IS	2.20398
Meta-testing cohort 2_631	GSM786512	2.89723
Meta-testing cohort 2_632	GSM340607	0.71588
Meta-testing cohort 2_634	GSM806823	1.01894
Meta-testing cohort 2_635	TCGA_XF_A8HB	1.80415
Meta-testing cohort 2_635	TCGA_XF_A8HB	1.80415
Meta-testing cohort 2_636	GSM340712	2.97005
Meta-testing cohort 2_639	GSM806819	0.977882
Meta-testing cohort 2_64	GSM814189	1.74129
Meta-testing cohort 2_640	GSM814353	2.28991
Meta-testing cohort 2_641	TCGA_S5_AA26	2.69322
Meta-testing cohort 2_641	TCGA_S5_AA26	2.69322
Meta-testing cohort 2_643	TCGA_DK_A6AW	2.15512
Meta-testing cohort 2_643	TCGA_DK_A6AW	2.15512
Meta-testing cohort 2_644	GSM340737.x	1.1977
Meta-testing cohort 2_645	TCGA_FJ_A3ZF	2.75679
Meta-testing cohort 2_645	TCGA_FJ_A3ZF	2.75679
Meta-testing cohort 2_647	GSM2301870	1.96693
Meta-testing cohort 2_648	U1023	0.732373
Meta-testing cohort 2_65	GSM2301857	0.927788
Meta-testing cohort 2_650	U0041	0.969267
Meta-testing cohort 2_651	U0438	1.19948
Meta-testing cohort 2_652	FR_30_U133_2.CEL	2.6976
Meta-testing cohort 2_653	GSM340722.x	1.85804
Meta-testing cohort 2_654	GSM2301866	0.530302
Meta-testing cohort 2_655	GSM340696	2.84159
Meta-testing cohort 2_656	U1286	1.00289
Meta-testing cohort 2_657	FR_181_U133_2.CEL	2.07084
Meta-testing cohort 2_661	TCGA_E5_A4U1	2.40774
Meta-testing cohort 2_661	TCGA_E5_A4U1	2.40774
Meta-testing cohort 2_663	TCGA_XF_A8HG	2.84603
Meta-testing cohort 2_663	TCGA_XF_A8HG	2.84603
Meta-testing cohort 2_665	U0457	0.898312
Meta-testing cohort 2_666	GSM814289	1.79923
Meta-testing cohort 2_667	GSM3699781	1.45001
Meta-testing cohort 2_668	GSM814348	1.02161
Meta-testing cohort 2_67	GSM340727	2.89903
Meta-testing cohort 2_670	GSM786520	2.68466
Meta-testing cohort 2_671	U0455	1.5564
Meta-testing cohort 2_672	GSM814347	1.63852
Meta-testing cohort 2_673	GSM814272	1.51573
Meta-testing cohort 2_679	GSM340710.x	2.12049
Meta-testing cohort 2_68	U1307	0.945029
Meta-testing cohort 2_680	U1243	0.458384
Meta-testing cohort 2_681	GSM786549	2.72615
Meta-testing cohort 2_682	TCGA_XF_AAMJ	3.54912
Meta-testing cohort 2_682	TCGA_XF_AAMJ	3.54912
Meta-testing cohort 2_683	GSM786522	2.51241
Meta-testing cohort 2_687	GSM2454225	1.00289
Meta-testing cohort 2_688	U0264	0.561977
Meta-testing cohort 2_689	U1192	1.21173
Meta-testing cohort 2_690	TCGA_ZF_A9R3	1.94362
Meta-testing cohort 2_690	TCGA_ZF_A9R3	1.94362
Meta-testing cohort 2_691	BLCA_Nac_10	2.40097
Meta-testing cohort 2_692	U1271	0.94423
Meta-testing cohort 2_695	TCGA_E5_A2PC	2.96417
Meta-testing cohort 2_695	TCGA_E5_A2PC	2.96417
Meta-testing cohort 2_696	U1354	1.51128
Meta-testing cohort 2_699	GSM340668	0.585
Meta-testing cohort 2_7	GSM340658	1.6499
Meta-testing cohort 2_70	FR_67_U133_2.CEL	2.39509
Meta-testing cohort 2_700	GSM786498	2.97384
Meta-testing cohort 2_703	TCGA_GU_A42Q	2.96917
Meta-testing cohort 2_703	TCGA_GU_A42Q	2.96917
Meta-testing cohort 2_704	GSM806864	2.47628
Meta-testing cohort 2_705	U0267	0.948089
Meta-testing cohort 2_706	TCGA_DK_AA77	1.80009
Meta-testing cohort 2_706	TCGA_DK_AA77	1.80009
Meta-testing cohort 2_707	BLCA_Nac_93	2.20177
Meta-testing cohort 2_71	FR_65_U133_2.CEL	2.37882
Meta-testing cohort 2_711	GSM2301817	2.85168
Meta-testing cohort 2_712	BLCA_Nac_110	2.26075
Meta-testing cohort 2_713	U1292	1.78818
Meta-testing cohort 2_714	GSM2301794	1.47432
Meta-testing cohort 2_715	TCGA_CU_A0YN	2.35001
Meta-testing cohort 2_715	TCGA_CU_A0YN	2.35001
Meta-testing cohort 2_716	U1266	0.921375
Meta-testing cohort 2_719	GSM814056	2.39066
Meta-testing cohort 2_72	U1043	1.0483
Meta-testing cohort 2_720	GSM340657.x	1.61553
Meta-testing cohort 2_721	GSM786568	3.03245
Meta-testing cohort 2_723	U1171	1.63369
Meta-testing cohort 2_725	TCGA_BL_A13J	3.3746
Meta-testing cohort 2_725	TCGA_BL_A13J	3.3746
Meta-testing cohort 2_728	TCGA_FJ_A3ZE	3.28696
Meta-testing cohort 2_728	TCGA_FJ_A3ZE	3.28696
Meta-testing cohort 2_73	GSM806849	2.27132
Meta-testing cohort 2_730	GSM806923	2.25606
Meta-testing cohort 2_731	TCGA_FD_A6TB	2.88605
Meta-testing cohort 2_731	TCGA_FD_A6TB	2.88605
Meta-testing cohort 2_732	GSM3699764	0.690022
Meta-testing cohort 2_735	TCGA_FD_A3SN	2.92692
Meta-testing cohort 2_735	TCGA_FD_A3SN	2.92692
Meta-testing cohort 2_736	U0007	1.04171
Meta-testing cohort 2_737	GSM340642.x	1.74779
Meta-testing cohort 2_741	GSM786561	3.08911
Meta-testing cohort 2_742	TCGA_K4_A3WU	2.89279
Meta-testing cohort 2_742	TCGA_K4_A3WU	2.89279
Meta-testing cohort 2_745	U0550	0.996023
Meta-testing cohort 2_750	GSM814285	1.09924
Meta-testing cohort 2_751	U0161	1.13969
Meta-testing cohort 2_753	TCGA_FD_A3SJ	3.24328
Meta-testing cohort 2_753	TCGA_FD_A3SJ	3.24328
Meta-testing cohort 2_754	BLCA_Nac_97	2.78411
Meta-testing cohort 2_756	GSM814248	1.81364
Meta-testing cohort 2_757	U1264	1.7747
Meta-testing cohort 2_759	U0038	1.06688
Meta-testing cohort 2_76	GSM2301778	1.23559
Meta-testing cohort 2_761	GSM340689.x	1.47637
Meta-testing cohort 2_763	GSM786542	2.89723
Meta-testing cohort 2_764	FR_1_U133_2.CEL	2.89169
Meta-testing cohort 2_766	GSM814103	1.56247
Meta-testing cohort 2_768	GSM786513	2.85112
Meta-testing cohort 2_769	GSM2301890	3.3675
Meta-testing cohort 2_77	TCGA_BL_A13I	2.38622
Meta-testing cohort 2_77	TCGA_BL_A13I	2.38622
Meta-testing cohort 2_770	U0143	0.484841
Meta-testing cohort 2_773	GSM2301825	1.19263
Meta-testing cohort 2_775	TCGA_ZF_AA53	1.98565
Meta-testing cohort 2_775	TCGA_ZF_AA53	1.98565
Meta-testing cohort 2_776	U0348	0.972158
Meta-testing cohort 2_777	TCGA_BT_A3PK	2.75716
Meta-testing cohort 2_777	TCGA_BT_A3PK	2.75716
Meta-testing cohort 2_778	GSM340691.x	1.13273
Meta-testing cohort 2_779	GSM340627.x	1.57156
Meta-testing cohort 2_780	GSM340744.x	1.51889
Meta-testing cohort 2_781	GSM806914	1.78891
Meta-testing cohort 2_783	U0154	0.909814
Meta-testing cohort 2_79	TCGA_XF_A9SX	2.94635
Meta-testing cohort 2_79	TCGA_XF_A9SX	2.94635
Meta-testing cohort 2_81	GSM814204	2.83074
Meta-testing cohort 2_84	GSM2301815	3.50182
Meta-testing cohort 2_86	GSM340631	0.536154
Meta-testing cohort 2_87	GSM340626	1.07718
Meta-testing cohort 2_88	GSM2301880	2.34352
Meta-testing cohort 2_91	GSM340645.y	1.53557
Meta-testing cohort 2_93	GSM806873	1.54464
Meta-testing cohort 2_97	GSM2301893	3.26728
Meta-testing cohort 2_98	FR_139_U133_2.CEL	2.30698
Meta-testing cohort 3_1	U1084	1.46984
Meta-testing cohort 3_10	U1408	0.451891
Meta-testing cohort 3_100	U0394	0.492303
Meta-testing cohort 3_102	BLCA_Cx_200	2.1079
Meta-testing cohort 3_103	GSM806882	0.928911
Meta-testing cohort 3_104	GSM814150	0.928911
Meta-testing cohort 3_108	U1374	1.52058
Meta-testing cohort 3_11	TCGA_DK_AA75	2.65884
Meta-testing cohort 3_11	TCGA_DK_AA75	2.65884
Meta-testing cohort 3_110	U1026	0.4971
Meta-testing cohort 3_111	U0023	0.93253
Meta-testing cohort 3_112	TCGA_UY_A9PA	2.27189
Meta-testing cohort 3_112	TCGA_UY_A9PA	2.27189
Meta-testing cohort 3_114	TCGA_FD_A3SS	3.29708
Meta-testing cohort 3_114	TCGA_FD_A3SS	3.29708
Meta-testing cohort 3_118	U1103	0.935234
Meta-testing cohort 3_119	U1113	0.935567
Meta-testing cohort 3_120	GSM340606	0.502188
Meta-testing cohort 3_121	GSM814163	1.52744
Meta-testing cohort 3_123	FR_91_U133_2.CEL	2.11837
Meta-testing cohort 3_125	GSM814331	0.93736
Meta-testing cohort 3_126	GSM3699761	0.93736
Meta-testing cohort 3_127	GSM806906	1.09484
Meta-testing cohort 3_13	TCGA_GU_A763	2.6592
Meta-testing cohort 3_13	TCGA_GU_A763	2.6592
Meta-testing cohort 3_130	TCGA_CF_A7I0	1.6864
Meta-testing cohort 3_130	TCGA_CF_A7I0	1.6864
Meta-testing cohort 3_131	U0268	0.938214
Meta-testing cohort 3_132	GSM3699773	0.940631
Meta-testing cohort 3_134	TCGA_4Z_AA7W	1.68924
Meta-testing cohort 3_134	TCGA_4Z_AA7W	1.68924
Meta-testing cohort 3_135	GSM3699783	0.941519
Meta-testing cohort 3_136	U1136	1.53245
Meta-testing cohort 3_137	GSM786518	2.71433
Meta-testing cohort 3_138	GSM340643.x	1.53324
Meta-testing cohort 3_139	TCGA_CF_A3MI	1.69137
Meta-testing cohort 3_139	TCGA_CF_A3MI	1.69137
Meta-testing cohort 3_140	U1300	0.943299
Meta-testing cohort 3_141	U1148	0.94423
Meta-testing cohort 3_142	GSM806842	1.53517
Meta-testing cohort 3_143	GSM340663.y	1.53557
Meta-testing cohort 3_144	GSM340717.y	1.10192
Meta-testing cohort 3_145	U1228	0.945029
Meta-testing cohort 3_147	BLCA_Nac_34	2.28503
Meta-testing cohort 3_148	U0152	2.28503
Meta-testing cohort 3_15	TCGA_GV_A6ZA	1.63471
Meta-testing cohort 3_15	TCGA_GV_A6ZA	1.63471
Meta-testing cohort 3_150	U0397	1.53737
Meta-testing cohort 3_155	TCGA_4Z_AA7Q	2.71998
Meta-testing cohort 3_155	TCGA_4Z_AA7Q	2.71998
Meta-testing cohort 3_156	U0100	0.947815
Meta-testing cohort 3_158	GSM340662.y	1.54021
Meta-testing cohort 3_159	BLCA_Nac_33	2.13265
Meta-testing cohort 3_16	U0380	0.886701
Meta-testing cohort 3_160	U0182	0.951804
Meta-testing cohort 3_161	GSM340740.x	1.54275
Meta-testing cohort 3_162	U0975	1.54278
Meta-testing cohort 3_163	GSM340739	1.54285
Meta-testing cohort 3_165	U0018	0.952546
Meta-testing cohort 3_166	U0998	0.519273
Meta-testing cohort 3_167	U0913	0.953121
Meta-testing cohort 3_168	U0856	0.953759
Meta-testing cohort 3_170	GSM2301829	0.956366
Meta-testing cohort 3_171	U1311	0.956448
Meta-testing cohort 3_172	GSM2301796	1.54738
Meta-testing cohort 3_176	GSM3699777	0.958052
Meta-testing cohort 3_177	TCGA_E7_A541	2.14007
Meta-testing cohort 3_177	TCGA_E7_A541	2.14007
Meta-testing cohort 3_178	TCGA_DK_A1A7	3.3227
Meta-testing cohort 3_178	TCGA_DK_A1A7	3.3227
Meta-testing cohort 3_18	U1356	0.889027
Meta-testing cohort 3_181	GSM806925	1.70739
Meta-testing cohort 3_182	GSM814271	0.961624
Meta-testing cohort 3_183	TCGA_E7_A519	2.14351
Meta-testing cohort 3_183	TCGA_E7_A519	2.14351
Meta-testing cohort 3_185	U1033	0.962282
Meta-testing cohort 3_186	GSM340650.x	1.11956
Meta-testing cohort 3_187	TCGA_K4_A5RJ	2.14439
Meta-testing cohort 3_187	TCGA_K4_A5RJ	2.14439
Meta-testing cohort 3_189	GSM340711.y	1.12032
Meta-testing cohort 3_19	U0261	0.455621
Meta-testing cohort 3_192	TCGA_E7_A4XJ	2.14613
Meta-testing cohort 3_192	TCGA_E7_A4XJ	2.14613
Meta-testing cohort 3_193	U0494	0.964347
Meta-testing cohort 3_194	TCGA_XF_A8HI	2.89453
Meta-testing cohort 3_194	TCGA_XF_A8HI	2.89453
Meta-testing cohort 3_195	TCGA_UY_A78N	3.32884
Meta-testing cohort 3_195	TCGA_UY_A78N	3.32884
Meta-testing cohort 3_197	U1177	0.532096
Meta-testing cohort 3_199	U1205	0.965751
Meta-testing cohort 3_2	U1146	0.87968
Meta-testing cohort 3_201	U0312	1.55858
Meta-testing cohort 3_203	U0006	0.96803
Meta-testing cohort 3_204	GSM814334	1.71668
Meta-testing cohort 3_206	U1426	0.970221
Meta-testing cohort 3_207	TCGA_KQ_A41S	2.74307
Meta-testing cohort 3_207	TCGA_KQ_A41S	2.74307
Meta-testing cohort 3_21	U1050	0.455878
Meta-testing cohort 3_212	TCGA_E7_A5KF	2.15341
Meta-testing cohort 3_212	TCGA_E7_A5KF	2.15341
Meta-testing cohort 3_214	GSM814194	0.972158
Meta-testing cohort 3_217	GSM340667	1.12972
Meta-testing cohort 3_219	U0189	0.972619
Meta-testing cohort 3_22	U0421	0.890621
Meta-testing cohort 3_220	U0048	0.972619
Meta-testing cohort 3_222	TCGA_E7_A8O8	1.72083
Meta-testing cohort 3_222	TCGA_E7_A8O8	1.72083
Meta-testing cohort 3_223	GSM814129	1.56355
Meta-testing cohort 3_226	GSM814119	2.15628
Meta-testing cohort 3_227	GSM786500	2.74721
Meta-testing cohort 3_23	GSM814167	0.891021
Meta-testing cohort 3_230	GSM3699758	0.975927
Meta-testing cohort 3_231	GSM806858	0.976103
Meta-testing cohort 3_232	U0069	0.976357
Meta-testing cohort 3_233	GSM340741.y	1.13387
Meta-testing cohort 3_235	U0496	0.545541
Meta-testing cohort 3_236	FR_34_U133_2.CEL	2.16147
Meta-testing cohort 3_237	U0903	0.979761
Meta-testing cohort 3_239	U0122	0.981554
Meta-testing cohort 3_24	U0870	0.891267
Meta-testing cohort 3_242	TCGA_FD_A43X	2.16342
Meta-testing cohort 3_242	TCGA_FD_A43X	2.16342
Meta-testing cohort 3_244	GSM806846	0.981554
Meta-testing cohort 3_245	GSM814349	0.548291
Meta-testing cohort 3_247	TCGA_BT_A20J	2.16467
Meta-testing cohort 3_247	TCGA_BT_A20J	2.16467
Meta-testing cohort 3_249	TCGA_ZF_A9RD	3.34678
Meta-testing cohort 3_249	TCGA_ZF_A9RD	3.34678
Meta-testing cohort 3_250	U0010	0.984269
Meta-testing cohort 3_251	TCGA_CF_A47S	1.73284
Meta-testing cohort 3_251	TCGA_CF_A47S	1.73284
Meta-testing cohort 3_252	GSM2454229	0.984882
Meta-testing cohort 3_254	TCGA_C4_A0F7	3.35101
Meta-testing cohort 3_254	TCGA_C4_A0F7	3.35101
Meta-testing cohort 3_255	GSM340675	1.57964
Meta-testing cohort 3_256	GSM806876	1.73703
Meta-testing cohort 3_257	TCGA_XF_A9T8	2.32834
Meta-testing cohort 3_257	TCGA_XF_A9T8	2.32834
Meta-testing cohort 3_26	TCGA_DK_A1AC	2.66501
Meta-testing cohort 3_26	TCGA_DK_A1AC	2.66501
Meta-testing cohort 3_260	BLCA_Nac_43	2.1744
Meta-testing cohort 3_262	GSM786503	2.76534
Meta-testing cohort 3_263	GSM2301874	2.76534
Meta-testing cohort 3_265	U0570	0.559422
Meta-testing cohort 3_266	GSM2454213	0.559444
Meta-testing cohort 3_267	GSM814177	1.58525
Meta-testing cohort 3_268	U1314	0.561416
Meta-testing cohort 3_269	GSM2454215	0.561977
Meta-testing cohort 3_270	GSM2454238	0.995632
Meta-testing cohort 3_271	GSM814288	0.995632
Meta-testing cohort 3_272	FR_81_U133_2.CEL	2.76844
Meta-testing cohort 3_273	GSM814199	1.58712
Meta-testing cohort 3_275	U1298	0.996399
Meta-testing cohort 3_277	GSM786577	2.76957
Meta-testing cohort 3_278	TCGA_GV_A3QK	2.92777
Meta-testing cohort 3_278	TCGA_GV_A3QK	2.92777
Meta-testing cohort 3_279	BLCA_Nac_128	1.74603
Meta-testing cohort 3_28	TCGA_E7_A4IJ	1.64202
Meta-testing cohort 3_28	TCGA_E7_A4IJ	1.64202
Meta-testing cohort 3_280	GSM340644	0.565271
Meta-testing cohort 3_281	GSM814237	1.15698
Meta-testing cohort 3_283	TCGA_G2_A2EK	1.74828
Meta-testing cohort 3_283	TCGA_G2_A2EK	1.74828
Meta-testing cohort 3_285	TCGA_K4_A4AC	2.18233
Meta-testing cohort 3_285	TCGA_K4_A4AC	2.18233
Meta-testing cohort 3_286	BLCA_Cx_219	2.77368
Meta-testing cohort 3_287	U0024	0.567684
Meta-testing cohort 3_289	BLCA_Cx_248	2.18395
Meta-testing cohort 3_292	GSM814184	1.59329
Meta-testing cohort 3_293	GSM340659.y	1.15987
Meta-testing cohort 3_294	GSM814299	1.59469
Meta-testing cohort 3_295	GSM814191	1.00595
Meta-testing cohort 3_296	TCGA_G2_A2EC	1.75453
Meta-testing cohort 3_296	TCGA_G2_A2EC	1.75453
Meta-testing cohort 3_297	GSM806860	1.59746
Meta-testing cohort 3_298	GSM814162	0.572865
Meta-testing cohort 3_299	GSM340708.x	1.59808
Meta-testing cohort 3_3	GSM814240	1.62798
Meta-testing cohort 3_300	BLCA_Nac_100	2.34631
Meta-testing cohort 3_301	TCGA_FD_A5BT	2.77997
Meta-testing cohort 3_301	TCGA_FD_A5BT	2.77997
Meta-testing cohort 3_302	U0323	1.59844
Meta-testing cohort 3_303	GSM806841	1.00752
Meta-testing cohort 3_31	TCGA_4Z_AA87	2.66849
Meta-testing cohort 3_31	TCGA_4Z_AA87	2.66849
Meta-testing cohort 3_311	TCGA_BT_A20Q	3.3746
Meta-testing cohort 3_311	TCGA_BT_A20Q	3.3746
Meta-testing cohort 3_313	U0076	1.01085
Meta-testing cohort 3_314	U0584	0.577199
Meta-testing cohort 3_315	GSM786491	1.75907
Meta-testing cohort 3_316	TCGA_DK_A1AG	2.78438
Meta-testing cohort 3_316	TCGA_DK_A1AG	2.78438
Meta-testing cohort 3_317	GSM2301905	2.35084
Meta-testing cohort 3_32	U0627	1.05335
Meta-testing cohort 3_321	U0094	0.579863
Meta-testing cohort 3_322	TCGA_E7_A8O7	1.7618
Meta-testing cohort 3_322	TCGA_E7_A8O7	1.7618
Meta-testing cohort 3_323	TCGA_UY_A78M	3.37752
Meta-testing cohort 3_323	TCGA_UY_A78M	3.37752
Meta-testing cohort 3_325	GSM814155	1.01472
Meta-testing cohort 3_326	TCGA_UY_A9PB	2.35413
Meta-testing cohort 3_326	TCGA_UY_A9PB	2.35413
Meta-testing cohort 3_327	FR_70_U133_2.CEL	2.78907
Meta-testing cohort 3_329	GSM814092	2.19813
Meta-testing cohort 3_33	U0078	0.462658
Meta-testing cohort 3_332	BLCA_Nac_118	2.79084
Meta-testing cohort 3_333	GSM340719.x	1.17565
Meta-testing cohort 3_334	GSM2301775	2.7917
Meta-testing cohort 3_335	U0385	1.60985
Meta-testing cohort 3_345	GSM814208	1.02211
Meta-testing cohort 3_349	GSM814210	0.588454
Meta-testing cohort 3_35	GSM3699774	0.465645
Meta-testing cohort 3_351	U1174	0.588454
Meta-testing cohort 3_352	TCGA_E7_A85H	2.36196
Meta-testing cohort 3_352	TCGA_E7_A85H	2.36196
Meta-testing cohort 3_353	GSM2454220	0.589153
Meta-testing cohort 3_354	U0777	1.61509
Meta-testing cohort 3_358	U1291	1.02757
Meta-testing cohort 3_36	U0976	0.465768
Meta-testing cohort 3_360	U1430	1.0282
Meta-testing cohort 3_363	BLCA_Nac_79	2.21083
Meta-testing cohort 3_364	U0349	1.02912
Meta-testing cohort 3_368	TCGA_XF_A9SH	2.21172
Meta-testing cohort 3_368	TCGA_XF_A9SH	2.21172
Meta-testing cohort 3_369	GSM806851	1.03034
Meta-testing cohort 3_370	GSM814358	1.18882
Meta-testing cohort 3_371	BLCA_Cx_241	2.80434
Meta-testing cohort 3_372	BLCA_Nac_62	2.21373
Meta-testing cohort 3_374	U0169	2.80651
Meta-testing cohort 3_375	TCGA_XF_AAMH	3.39928
Meta-testing cohort 3_375	TCGA_XF_AAMH	3.39928
Meta-testing cohort 3_378	GSM340661	1.62768
Meta-testing cohort 3_379	U0171	1.03674
Meta-testing cohort 3_381	GSM786566	2.21959
Meta-testing cohort 3_384	BLCA_Nac_8	2.37971
Meta-testing cohort 3_385	U1478	1.63156
Meta-testing cohort 3_387	GSM814164	1.04117
Meta-testing cohort 3_39	U1018	1.05762
Meta-testing cohort 3_390	U1462	1.63316
Meta-testing cohort 3_392	GSM814098	1.04267
Meta-testing cohort 3_393	GSM806840	0.613284
Meta-testing cohort 3_394	GSM340768	1.20447
Meta-testing cohort 3_395	TCGA_CU_A0YO	3.41213
Meta-testing cohort 3_395	TCGA_CU_A0YO	3.41213
Meta-testing cohort 3_396	GSM814264	1.0485
Meta-testing cohort 3_397	GSM340642	1.63985
Meta-testing cohort 3_399	GSM806839	2.231
Meta-testing cohort 3_4	U1336	0.87981
Meta-testing cohort 3_40	BLCA_Nac_89	2.08271
Meta-testing cohort 3_401	GSM814330	1.04913
Meta-testing cohort 3_402	GSM814298	1.0493
Meta-testing cohort 3_405	GSM786574	1.79783
Meta-testing cohort 3_408	TCGA_XF_A8HE	2.38979
Meta-testing cohort 3_408	TCGA_XF_A8HE	2.38979
Meta-testing cohort 3_409	U0104	1.64195
Meta-testing cohort 3_41	TCGA_XF_A9T0	2.67388
Meta-testing cohort 3_41	TCGA_XF_A9T0	2.67388
Meta-testing cohort 3_411	GSM814273	0.617728
Meta-testing cohort 3_413	FR_83_U133_2.CEL	2.82501
Meta-testing cohort 3_414	TCGA_GU_A42P	3.41672
Meta-testing cohort 3_414	TCGA_GU_A42P	3.41672
Meta-testing cohort 3_416	BLCA_Nac_96	3.41704
Meta-testing cohort 3_417	GSM2301879	3.41704
Meta-testing cohort 3_419	TCGA_BT_A20U	2.8261
Meta-testing cohort 3_419	TCGA_BT_A20U	2.8261
Meta-testing cohort 3_42	TCGA_DK_A3X2	3.26574
Meta-testing cohort 3_42	TCGA_DK_A3X2	3.26574
Meta-testing cohort 3_420	TCGA_BT_A2LB	2.8261
Meta-testing cohort 3_420	TCGA_BT_A2LB	2.8261
Meta-testing cohort 3_421	GSM2301786	2.8266
Meta-testing cohort 3_422	GSM2301777	1.21322
Meta-testing cohort 3_423	GSM786567	1.80415
Meta-testing cohort 3_425	GSM814290	1.05594
Meta-testing cohort 3_427	TCGA_K4_AAQO	2.39594
Meta-testing cohort 3_427	TCGA_K4_AAQO	2.39594
Meta-testing cohort 3_428	GSM814123	1.648
Meta-testing cohort 3_430	GSM814355	1.05707
Meta-testing cohort 3_432	TCGA_FD_A3SP	2.3976
Meta-testing cohort 3_432	TCGA_FD_A3SP	2.3976
Meta-testing cohort 3_433	TCGA_XF_AAN2	2.24045
Meta-testing cohort 3_433	TCGA_XF_AAN2	2.24045
Meta-testing cohort 3_434	TCGA_FD_A43P	2.24079
Meta-testing cohort 3_434	TCGA_FD_A43P	2.24079
Meta-testing cohort 3_435	GSM2301782	2.83428
Meta-testing cohort 3_437	GSM340729	2.24335
Meta-testing cohort 3_438	GSM3699786	1.06148
Meta-testing cohort 3_44	U0207	0.904011
Meta-testing cohort 3_440	GSM814089	1.21987
Meta-testing cohort 3_442	GSM814281	1.06409
Meta-testing cohort 3_443	GSM806850	1.06542
Meta-testing cohort 3_444	GSM814256	1.06542
Meta-testing cohort 3_449	GSM814321	0.63295
Meta-testing cohort 3_45	TCGA_CF_A9FM	1.06154
Meta-testing cohort 3_45	TCGA_CF_A9FM	1.06154
Meta-testing cohort 3_450	U0664	1.06714
Meta-testing cohort 3_451	BLCA_Nac_101	2.24901
Meta-testing cohort 3_452	U1317	1.06769
Meta-testing cohort 3_455	TCGA_GC_A3RC	1.817
Meta-testing cohort 3_455	TCGA_GC_A3RC	1.817
Meta-testing cohort 3_456	TCGA_G2_A2EO	2.84195
Meta-testing cohort 3_456	TCGA_G2_A2EO	2.84195
Meta-testing cohort 3_458	TCGA_DK_A6AV	2.25388
Meta-testing cohort 3_458	TCGA_DK_A6AV	2.25388
Meta-testing cohort 3_459	TCGA_FD_A5BR	1.82144
Meta-testing cohort 3_459	TCGA_FD_A5BR	1.82144
Meta-testing cohort 3_46	U0042	0.904541
Meta-testing cohort 3_460	BLCA_Nac_130	1.82149
Meta-testing cohort 3_462	FR_14_U133_2.CEL	2.84699
Meta-testing cohort 3_463	FR_28_U133_2.CEL	2.84699
Meta-testing cohort 3_465	GSM814121	1.66839
Meta-testing cohort 3_466	BLCA_Nac_11	2.41747
Meta-testing cohort 3_468	GSM814159	1.66925
Meta-testing cohort 3_469	GSM806861	1.23559
Meta-testing cohort 3_47	U1425	0.904714
Meta-testing cohort 3_470	BLCA_Cx_131	1.82653
Meta-testing cohort 3_472	U1031	0.644659
Meta-testing cohort 3_473	FR_93_U133_2.CEL	2.41803
Meta-testing cohort 3_474	GSM806821	0.645223
Meta-testing cohort 3_476	GSM2301792	1.66981
Meta-testing cohort 3_477	TCGA_DK_A6B1	2.26201
Meta-testing cohort 3_477	TCGA_DK_A6B1	2.26201
Meta-testing cohort 3_478	GSM340725	2.85813
Meta-testing cohort 3_479	GSM814251	2.26821
Meta-testing cohort 3_482	FR_073_U133_2.CEL	2.42636
Meta-testing cohort 3_484	GSM2301885	2.86167
Meta-testing cohort 3_485	GSM786563	2.86167
Meta-testing cohort 3_486	TCGA_XF_AAMT	3.45319
Meta-testing cohort 3_486	TCGA_XF_AAMT	3.45319
Meta-testing cohort 3_487	TCGA_2F_A9KR	2.42928
Meta-testing cohort 3_487	TCGA_2F_A9KR	2.42928
Meta-testing cohort 3_488	TCGA_BT_A20P	2.86332
Meta-testing cohort 3_488	TCGA_BT_A20P	2.86332
Meta-testing cohort 3_489	GSM814076	2.27267
Meta-testing cohort 3_49	U0643	0.472374
Meta-testing cohort 3_490	GSM340748	1.24824
Meta-testing cohort 3_491	GSM2301785	0.657509
Meta-testing cohort 3_492	TCGA_PQ_A6FI	2.27308
Meta-testing cohort 3_492	TCGA_PQ_A6FI	2.27308
Meta-testing cohort 3_493	GSM2301898	2.86442
Meta-testing cohort 3_494	GSM814302	1.6827
Meta-testing cohort 3_495	GSM814176	2.27401
Meta-testing cohort 3_496	U0090	1.68404
Meta-testing cohort 3_497	FR_134_U133_2.CEL	2.27515
Meta-testing cohort 3_498	U0414	1.68488
Meta-testing cohort 3_5	U1020	0.883141
Meta-testing cohort 3_50	U0531	1.06379
Meta-testing cohort 3_500	GSM3699754	1.09786
Meta-testing cohort 3_501	GSM786554	2.87067
Meta-testing cohort 3_502	GSM814122	1.09815
Meta-testing cohort 3_504	TCGA_FD_A62N	2.87173
Meta-testing cohort 3_504	TCGA_FD_A62N	2.87173
Meta-testing cohort 3_505	GSM814100	0.665534
Meta-testing cohort 3_506	GSM806834	2.28147
Meta-testing cohort 3_508	GSM3699779	0.668088
Meta-testing cohort 3_509	GSM2454226	1.10264
Meta-testing cohort 3_51	GSM340613	2.6799
Meta-testing cohort 3_510	TCGA_YC_A8S6	2.28451
Meta-testing cohort 3_510	TCGA_YC_A8S6	2.28451
Meta-testing cohort 3_511	TCGA_G2_A3VY	2.28509
Meta-testing cohort 3_511	TCGA_G2_A3VY	2.28509
Meta-testing cohort 3_512	GSM340734	0.669566
Meta-testing cohort 3_515	TCGA_KQ_A41R	2.28541
Meta-testing cohort 3_515	TCGA_KQ_A41R	2.28541
Meta-testing cohort 3_516	FR_192_U133_2.CEL	2.28578
Meta-testing cohort 3_517	GSM340716.y	1.69485
Meta-testing cohort 3_518	GSM340682.y	1.6953
Meta-testing cohort 3_519	GSM814218	2.28721
Meta-testing cohort 3_522	GSM2454242	1.10872
Meta-testing cohort 3_523	GSM806880	1.10872
Meta-testing cohort 3_524	U0334	1.266
Meta-testing cohort 3_525	TCGA_KQ_A41P	3.47455
Meta-testing cohort 3_525	TCGA_KQ_A41P	3.47455
Meta-testing cohort 3_527	GSM2301789	2.88452
Meta-testing cohort 3_528	GSM340610	1.70303
Meta-testing cohort 3_529	GSM806875	1.27053
Meta-testing cohort 3_530	GSM814278	1.27142
Meta-testing cohort 3_531	TCGA_DK_A3WX	2.88702
Meta-testing cohort 3_531	TCGA_DK_A3WX	2.88702
Meta-testing cohort 3_532	TCGA_DK_A2I4	2.88746
Meta-testing cohort 3_532	TCGA_DK_A2I4	2.88746
Meta-testing cohort 3_534	TCGA_FD_A6TA	3.04503
Meta-testing cohort 3_534	TCGA_FD_A6TA	3.04503
Meta-testing cohort 3_536	BLCA_Nac_85	2.88861
Meta-testing cohort 3_538	GSM786524	2.89169
Meta-testing cohort 3_540	U0291	1.12011
Meta-testing cohort 3_541	GSM340681	1.71242
Meta-testing cohort 3_542	GSM2301803	0.687848
Meta-testing cohort 3_545	BLCA_Nac_141	2.30555
Meta-testing cohort 3_546	U0102	1.12368
Meta-testing cohort 3_547	GSM814213	1.12443
Meta-testing cohort 3_548	GSM786496	2.89723
Meta-testing cohort 3_549	GSM806887	1.71536
Meta-testing cohort 3_551	TCGA_2F_A9KQ	2.89792
Meta-testing cohort 3_551	TCGA_2F_A9KQ	2.89792
Meta-testing cohort 3_553	GSM814096	1.71605
Meta-testing cohort 3_555	GSM806903	2.30698
Meta-testing cohort 3_556	BLCA_Cx_285	3.05748
Meta-testing cohort 3_557	GSM3699771	1.12785
Meta-testing cohort 3_558	TCGA_4Z_AA86	3.49159
Meta-testing cohort 3_558	TCGA_4Z_AA86	3.49159
Meta-testing cohort 3_559	TCGA_GU_A762	3.49159
Meta-testing cohort 3_559	TCGA_GU_A762	3.49159
Meta-testing cohort 3_562	TCGA_XF_AAME	1.87976
Meta-testing cohort 3_562	TCGA_XF_AAME	1.87976
Meta-testing cohort 3_563	GSM340687.y	1.72514
Meta-testing cohort 3_564	GSM806805	1.88398
Meta-testing cohort 3_566	GSM3699785	1.13625
Meta-testing cohort 3_567	U0989	1.72746
Meta-testing cohort 3_57	TCGA_G2_A2EL	2.0914
Meta-testing cohort 3_57	TCGA_G2_A2EL	2.0914
Meta-testing cohort 3_573	GSM814182	2.31994
Meta-testing cohort 3_575	TCGA_4Z_AA7Y	1.88629
Meta-testing cohort 3_575	TCGA_4Z_AA7Y	1.88629
Meta-testing cohort 3_577	GSM806852	1.72949
Meta-testing cohort 3_578	GSM814114	1.72949
Meta-testing cohort 3_58	FR_37_U133_2.CEL	2.68254
Meta-testing cohort 3_581	GSM340612	1.88791
Meta-testing cohort 3_582	GSM2301779	1.29697
Meta-testing cohort 3_583	GSM2301813	1.73164
Meta-testing cohort 3_584	BLCA_Nac_142	2.3233
Meta-testing cohort 3_586	U1465	1.30401
Meta-testing cohort 3_587	TCGA_DK_A1AF	3.51202
Meta-testing cohort 3_587	TCGA_DK_A1AF	3.51202
Meta-testing cohort 3_588	FR_253_U133_2.CEL	2.48789
Meta-testing cohort 3_589	GSM806832	1.89801
Meta-testing cohort 3_590	TCGA_DK_A1AD	3.51597
Meta-testing cohort 3_590	TCGA_DK_A1AD	3.51597
Meta-testing cohort 3_592	GSM340697	2.49319
Meta-testing cohort 3_593	GSM340735.x	1.74571
Meta-testing cohort 3_594	BLCA_Nac_17	2.3372
Meta-testing cohort 3_595	GSM814284	1.1557
Meta-testing cohort 3_598	GSM3699748	0.722623
Meta-testing cohort 3_599	U0447	0.727909
Meta-testing cohort 3_60	U0337	0.476367
Meta-testing cohort 3_600	BLCA_Nac_147	2.34453
Meta-testing cohort 3_602	GSM340711.x	1.32739
Meta-testing cohort 3_603	GSM340655.y	1.76105
Meta-testing cohort 3_604	BLCA_Nac_139	2.94292
Meta-testing cohort 3_605	GSM2301886	1.17011
Meta-testing cohort 3_606	GSM806812	1.17297
Meta-testing cohort 3_608	BLCA_Nac_40	2.94578
Meta-testing cohort 3_61	FR_142_U133_2.CEL	2.09331
Meta-testing cohort 3_614	TCGA_ZF_AA54	2.95616
Meta-testing cohort 3_614	TCGA_ZF_AA54	2.95616
Meta-testing cohort 3_615	TCGA_CU_A3KJ	2.96209
Meta-testing cohort 3_615	TCGA_CU_A3KJ	2.96209
Meta-testing cohort 3_616	GSM2301899	3.11937
Meta-testing cohort 3_619	GSM806824	1.78357
Meta-testing cohort 3_620	GSM814083	1.78357
Meta-testing cohort 3_624	GSM786507	2.53552
Meta-testing cohort 3_625	GSM340686.x	1.7873
Meta-testing cohort 3_626	U1263	1.7873
Meta-testing cohort 3_627	GSM2301878	2.96917
Meta-testing cohort 3_628	BLCA_Nac_122	2.96917
Meta-testing cohort 3_63	GSM2454243	0.478023
Meta-testing cohort 3_632	GSM2301858	2.37912
Meta-testing cohort 3_635	GSM814274	0.76359
Meta-testing cohort 3_637	GSM340620	3.12835
Meta-testing cohort 3_638	GSM340671.y	1.78977
Meta-testing cohort 3_639	BLCA_Nac_13	2.53837
Meta-testing cohort 3_64	GSM806896	1.50261
Meta-testing cohort 3_640	TCGA_2F_A9KP	3.56296
Meta-testing cohort 3_640	TCGA_2F_A9KP	3.56296
Meta-testing cohort 3_642	GSM806900	2.3831
Meta-testing cohort 3_644	GSM2454241	1.20134
Meta-testing cohort 3_646	GSM814356	1.95912
Meta-testing cohort 3_647	GSM340674	1.96541
Meta-testing cohort 3_649	GSM806857	1.80863
Meta-testing cohort 3_65	U1275	0.911818
Meta-testing cohort 3_650	TCGA_CF_A3MG	1.96591
Meta-testing cohort 3_650	TCGA_CF_A3MG	1.96591
Meta-testing cohort 3_652	TCGA_GV_A3QH	2.39956
Meta-testing cohort 3_652	TCGA_GV_A3QH	2.39956
Meta-testing cohort 3_653	GSM340672	2.9905
Meta-testing cohort 3_654	GSM786571	2.55728
Meta-testing cohort 3_655	BLCA_Nac_47	2.99121
Meta-testing cohort 3_656	U0088	1.21872
Meta-testing cohort 3_659	U0099	0.785063
Meta-testing cohort 3_66	U1209	1.50318
Meta-testing cohort 3_660	GSM2301783	2.40059
Meta-testing cohort 3_661	GSM814291	2.40059
Meta-testing cohort 3_662	FR_141_U133_2.CEL	1.96693
Meta-testing cohort 3_663	TCGA_FD_A5BY	2.55787
Meta-testing cohort 3_663	TCGA_FD_A5BY	2.55787
Meta-testing cohort 3_667	GSM814058	0.785063
Meta-testing cohort 3_668	U0283	1.21972
Meta-testing cohort 3_669	GSM340605.y	1.81076
Meta-testing cohort 3_67	U1194	1.50412
Meta-testing cohort 3_674	GSM786515	2.99868
Meta-testing cohort 3_676	TCGA_BT_A20V	3.16332
Meta-testing cohort 3_676	TCGA_BT_A20V	3.16332
Meta-testing cohort 3_677	TCGA_ZF_AA56	3.00801
Meta-testing cohort 3_677	TCGA_ZF_AA56	3.00801
Meta-testing cohort 3_678	U1335	1.23638
Meta-testing cohort 3_680	GSM814295	2.41826
Meta-testing cohort 3_682	TCGA_FD_A5C1	2.57659
Meta-testing cohort 3_682	TCGA_FD_A5C1	2.57659
Meta-testing cohort 3_683	GSM786583	2.41964
Meta-testing cohort 3_684	GSM2301809	1.83071
Meta-testing cohort 3_685	BLCA_Nac_143	3.01343
Meta-testing cohort 3_687	GSM2301807	1.8319
Meta-testing cohort 3_689	FR_120_U133_2.CEL	1.98918
Meta-testing cohort 3_690	TCGA_GC_A3I6	2.58012
Meta-testing cohort 3_690	TCGA_GC_A3I6	2.58012
Meta-testing cohort 3_692	GSM786572	1.83576
Meta-testing cohort 3_695	TCGA_FD_A5BV	2.58836
Meta-testing cohort 3_695	TCGA_FD_A5BV	2.58836
Meta-testing cohort 3_696	GSM806810	2.44559
Meta-testing cohort 3_699	BLCA_Nac_105	2.01317
Meta-testing cohort 3_7	U1404	0.449679
Meta-testing cohort 3_70	TCGA_E7_A6ME	2.09731
Meta-testing cohort 3_70	TCGA_E7_A6ME	2.09731
Meta-testing cohort 3_700	TCGA_2F_A9KW	3.03883
Meta-testing cohort 3_700	TCGA_2F_A9KW	3.03883
Meta-testing cohort 3_701	TCGA_FD_A6TF	3.62976
Meta-testing cohort 3_701	TCGA_FD_A6TF	3.62976
Meta-testing cohort 3_705	TCGA_DK_A1AB	3.64667
Meta-testing cohort 3_705	TCGA_DK_A1AB	3.64667
Meta-testing cohort 3_712	GSM806894	1.8852
Meta-testing cohort 3_714	GSM814245	1.8852
Meta-testing cohort 3_716	GSM806881	1.90283
Meta-testing cohort 3_717	FR_2_U133_2.CEL	2.65235
Meta-testing cohort 3_719	GSM814329	1.90666
Meta-testing cohort 3_72	TCGA_4Z_AA89	2.84553
Meta-testing cohort 3_72	TCGA_4Z_AA89	2.84553
Meta-testing cohort 3_721	GSM814309	0.882074
Meta-testing cohort 3_723	GSM340634	3.08985
Meta-testing cohort 3_724	GSM340656	1.90798
Meta-testing cohort 3_725	FR_180_U133_2.CEL	2.65619
Meta-testing cohort 3_726	TCGA_DK_A3IL	3.68078
Meta-testing cohort 3_726	TCGA_DK_A3IL	3.68078
Meta-testing cohort 3_727	GSM340611.x	1.90798
Meta-testing cohort 3_728	GSM806863	2.06526
Meta-testing cohort 3_73	U0411	0.915768
Meta-testing cohort 3_731	GSM786553	3.09178
Meta-testing cohort 3_732	GSM340646.x	1.91055
Meta-testing cohort 3_733	FR_256_U133_2.CEL	2.50281
Meta-testing cohort 3_734	GSM814238	2.06919
Meta-testing cohort 3_735	TCGA_UY_A78L	3.25138
Meta-testing cohort 3_735	TCGA_UY_A78L	3.25138
Meta-testing cohort 3_736	TCGA_FT_A61P	3.68504
Meta-testing cohort 3_736	TCGA_FT_A61P	3.68504
Meta-testing cohort 3_737	TCGA_FD_A5BU	2.50408
Meta-testing cohort 3_737	TCGA_FD_A5BU	2.50408
Meta-testing cohort 3_738	GSM786536	3.09543
Meta-testing cohort 3_743	GSM786526	3.09543
Meta-testing cohort 3_744	TCGA_LC_A66R	3.69772
Meta-testing cohort 3_744	TCGA_LC_A66R	3.69772
Meta-testing cohort 3_746	TCGA_GU_A767	3.70661
Meta-testing cohort 3_746	TCGA_GU_A767	3.70661
Meta-testing cohort 3_747	FR_25_U133_2.CEL	3.11655
Meta-testing cohort 3_749	GSM806931	1.50363
Meta-testing cohort 3_75	TCGA_E7_A7PW	2.25604
Meta-testing cohort 3_75	TCGA_E7_A7PW	2.25604
Meta-testing cohort 3_750	BLCA_Cx_212	2.10137
Meta-testing cohort 3_751	GSM340752	1.94557
Meta-testing cohort 3_752	BLCA_Nac_60	2.69439
Meta-testing cohort 3_753	TCGA_UY_A9PD	3.12886
Meta-testing cohort 3_753	TCGA_UY_A9PD	3.12886
Meta-testing cohort 3_755	TCGA_DK_A2I6	3.74805
Meta-testing cohort 3_755	TCGA_DK_A2I6	3.74805
Meta-testing cohort 3_757	TCGA_XF_A9ST	3.15758
Meta-testing cohort 3_757	TCGA_XF_A9ST	3.15758
Meta-testing cohort 3_76	U1237	0.484043
Meta-testing cohort 3_760	TCGA_XF_A9SU	3.76799
Meta-testing cohort 3_760	TCGA_XF_A9SU	3.76799
Meta-testing cohort 3_762	GSM340639	0.98007
Meta-testing cohort 3_763	U0972	1.41544
Meta-testing cohort 3_764	GSM340742.y	1.57278
Meta-testing cohort 3_765	GSM2301864	3.1883
Meta-testing cohort 3_766	BLCA_Nac_114	3.19034
Meta-testing cohort 3_767	TCGA_GU_AATQ	3.19331
Meta-testing cohort 3_767	TCGA_GU_AATQ	3.19331
Meta-testing cohort 3_768	GSM340677	2.19325
Meta-testing cohort 3_769	GSM2301891	3.22066
Meta-testing cohort 3_77	U0613	0.918534
Meta-testing cohort 3_770	TCGA_ZF_A9RC	3.23394
Meta-testing cohort 3_770	TCGA_ZF_A9RC	3.23394
Meta-testing cohort 3_771	TCGA_BT_A2LD	3.82561
Meta-testing cohort 3_771	TCGA_BT_A2LD	3.82561
Meta-testing cohort 3_774	GSM786544	3.26561
Meta-testing cohort 3_775	BLCA_Nac_146	2.24269
Meta-testing cohort 3_776	TCGA_XF_AAMY	3.30236
Meta-testing cohort 3_776	TCGA_XF_AAMY	3.30236
Meta-testing cohort 3_778	TCGA_FD_A5BZ	3.8933
Meta-testing cohort 3_778	TCGA_FD_A5BZ	3.8933
Meta-testing cohort 3_779	GSM3699778	1.53529
Meta-testing cohort 3_78	GSM340704	2.69156
Meta-testing cohort 3_781	FR_075_U133_2.CEL	3.45055
Meta-testing cohort 3_782	GSM2301888	4.08593
Meta-testing cohort 3_784	TCGA_K4_A6MB	3.90505
Meta-testing cohort 3_784	TCGA_K4_A6MB	3.90505
Meta-testing cohort 3_79	U0918	0.48518
Meta-testing cohort 3_81	U0442	0.921261
Meta-testing cohort 3_82	U1341	0.487719
Meta-testing cohort 3_83	GSM806878	1.51248
Meta-testing cohort 3_85	U1293	0.922077
Meta-testing cohort 3_86	U0425	0.488887
Meta-testing cohort 3_88	U0150	2.26237
Meta-testing cohort 3_9	U0160	1.04267
Meta-testing cohort 3_90	U0706	1.08151
Meta-testing cohort 3_91	U0999	0.92456
Meta-testing cohort 3_93	GSM814317	2.10667
Meta-testing cohort 3_94	U1064	0.924797
Meta-testing cohort 3_95	BLCA_Nac_22	1.67301
Meta-testing cohort 3_96	TCGA_DK_AA6Q	2.85488
Meta-testing cohort 3_96	TCGA_DK_AA6Q	2.85488
Meta-testing cohort 3_97	GSM340637	1.51608
Meta-testing cohort 3_99	TCGA_XF_A8HD	2.6981
Meta-testing cohort 3_99	TCGA_XF_A8HD	2.6981
Meta-training cohort 102	GSM340687.x	1.78078
Meta-training cohort 105	GSM814224	0.67506
Meta-training cohort 106	TCGA_GC_A4ZW	2.81473
Meta-training cohort 106	TCGA_GC_A4ZW	2.81473
Meta-training cohort 107	U0631	0.930095
Meta-training cohort 108	TCGA_BT_A42E	2.72977
Meta-training cohort 108	TCGA_BT_A42E	2.72977
Meta-training cohort 11	GSM2301826	0.785063
Meta-training cohort 113	GSM340614	2.34453
Meta-training cohort 114	FR_19_U133_2.CEL	2.77656
Meta-training cohort 115	GSM786497	1.51573
Meta-training cohort 116	GSM806845	1.29846
Meta-training cohort 117	TCGA_XF_A8HF	2.9536
Meta-training cohort 117	TCGA_XF_A8HF	2.9536
Meta-training cohort 118	TCGA_LT_A8JT	2.21221
Meta-training cohort 118	TCGA_LT_A8JT	2.21221
Meta-training cohort 12	TCGA_CF_A5UA	2.1079
Meta-training cohort 12	TCGA_CF_A5UA	2.1079
Meta-training cohort 120	GSM340745	3.30462
Meta-training cohort 121	GSM340730	1.00632
Meta-training cohort 125	TCGA_FD_A3N5	2.63189
Meta-training cohort 125	TCGA_FD_A3N5	2.63189
Meta-training cohort 126	GSM786519	2.83196
Meta-training cohort 127	GSM814095	1.10493
Meta-training cohort 129	GSM806929	2.56589
Meta-training cohort 13	TCGA_FD_A3NA	2.00526
Meta-training cohort 13	TCGA_FD_A3NA	2.00526
Meta-training cohort 130	U0134	1.00976
Meta-training cohort 132	GSM2301847	1.28366
Meta-training cohort 133	GSM806907	1.00739
Meta-training cohort 136	TCGA_ZF_AA58	2.98802
Meta-training cohort 136	TCGA_ZF_AA58	2.98802
Meta-training cohort 138	TCGA_UY_A9PE	3.68078
Meta-training cohort 138	TCGA_UY_A9PE	3.68078
Meta-training cohort 139	BLCA_Nac_37	2.35956
Meta-training cohort 14	BLCA_Nac_119	2.28079
Meta-training cohort 141	GSM3699782	0.722041
Meta-training cohort 144	TCGA_E7_A6MD	3.49594
Meta-training cohort 144	TCGA_E7_A6MD	3.49594
Meta-training cohort 145	GSM814144	1.50275
Meta-training cohort 146	U1190	1.08783
Meta-training cohort 147	TCGA_GC_A3RD	2.88152
Meta-training cohort 147	TCGA_GC_A3RD	2.88152
Meta-training cohort 15	GSM2301882	2.85915
Meta-training cohort 151	TCGA_4Z_AA84	2.96052
Meta-training cohort 151	TCGA_4Z_AA84	2.96052
Meta-training cohort 153	TCGA_ZF_AA4R	3.75074
Meta-training cohort 153	TCGA_ZF_AA4R	3.75074
Meta-training cohort 154	GSM2301832	1.62247
Meta-training cohort 155	U0905	1.09394
Meta-training cohort 156	GSM2454216	1.2172
Meta-training cohort 157	GSM2301788	3.04488
Meta-training cohort 158	GSM340758	2.72169
Meta-training cohort 16	GSM340664	0.663869
Meta-training cohort 163	GSM814233	2.08541
Meta-training cohort 165	TCGA_K4_A5RI	2.8261
Meta-training cohort 165	TCGA_K4_A5RI	2.8261
Meta-training cohort 166	GSM814260	1.21407
Meta-training cohort 169	GSM814337	1.07888
Meta-training cohort 170	GSM340667.y	1.10192
Meta-training cohort 171	U1332	1.71461
Meta-training cohort 172	TCGA_E7_A97P	2.22611
Meta-training cohort 172	TCGA_E7_A97P	2.22611
Meta-training cohort 173	GSM786541	0.987875
Meta-training cohort 174	U1432	0.467185
Meta-training cohort 175	U0461	0.463909
Meta-training cohort 178	TCGA_XF_A8HC	3.5405
Meta-training cohort 178	TCGA_XF_A8HC	3.5405
Meta-training cohort 18	GSM2301780	2.3063
Meta-training cohort 181	U0534	1.1299
Meta-training cohort 182	TCGA_K4_A3WS	3.10679
Meta-training cohort 182	TCGA_K4_A3WS	3.10679
Meta-training cohort 183	BLCA_Nac_148	2.28628
Meta-training cohort 184	U1055	0.995632
Meta-training cohort 185	U1409	0.450819
Meta-training cohort 188	BLCA_Nac_149	2.5364
Meta-training cohort 189	GSM2301802	1.00352
Meta-training cohort 19	TCGA_FD_A3SQ	3.83606
Meta-training cohort 19	TCGA_FD_A3SQ	3.83606
Meta-training cohort 190	GSM340762	2.78263
Meta-training cohort 191	U1161	0.910096
Meta-training cohort 192	TCGA_ZF_AA4T	3.26532
Meta-training cohort 192	TCGA_ZF_AA4T	3.26532
Meta-training cohort 194	TCGA_KQ_A41N	2.89768
Meta-training cohort 194	TCGA_KQ_A41N	2.89768
Meta-training cohort 195	BLCA_Nac_140	1.75259
Meta-training cohort 196	TCGA_YF_AA3M	1.70624
Meta-training cohort 196	TCGA_YF_AA3M	1.70624
Meta-training cohort 198	GSM814185	0.996399
Meta-training cohort 199	TCGA_GU_AATO	3.68504
Meta-training cohort 199	TCGA_GU_AATO	3.68504
Meta-training cohort 200	U0577	0.444559
Meta-training cohort 201	GSM814068	2.33014
Meta-training cohort 202	GSM814312	1.04725
Meta-training cohort 203	GSM340766	2.35463
Meta-training cohort 204	U0986	0.492371
Meta-training cohort 205	TCGA_FD_A3SM	3.78425
Meta-training cohort 205	TCGA_FD_A3SM	3.78425
Meta-training cohort 206	BLCA_Nac_16	2.86332
Meta-training cohort 209	TCGA_DK_A2HX	3.7169
Meta-training cohort 209	TCGA_DK_A2HX	3.7169
Meta-training cohort 21	U1368	0.945029
Meta-training cohort 210	U0013	1.00752
Meta-training cohort 211	TCGA_UY_A8OD	2.33922
Meta-training cohort 211	TCGA_UY_A8OD	2.33922
Meta-training cohort 213	U0932	0.455811
Meta-training cohort 214	GSM2301852	1.61851
Meta-training cohort 215	GSM3699780	1.01583
Meta-training cohort 216	BLCA_Nac_115	1.74792
Meta-training cohort 217	U0214	1.66679
Meta-training cohort 218	GSM806919	1.2227
Meta-training cohort 220	GSM786516	3.34168
Meta-training cohort 221	GSM340671.x	1.5295
Meta-training cohort 222	TCGA_DK_AA6P	2.08581
Meta-training cohort 222	TCGA_DK_AA6P	2.08581
Meta-training cohort 223	GSM340653	3.12596
Meta-training cohort 227	U0479	2.87859
Meta-training cohort 228	U0544	0.656752
Meta-training cohort 229	U0603	1.53033
Meta-training cohort 230	U0653	1.60896
Meta-training cohort 231	GSM340722.y	1.62247
Meta-training cohort 232	GSM814190	1.06542
Meta-training cohort 235	GSM814328	1.04269
Meta-training cohort 236	GSM806885	1.13234
Meta-training cohort 237	U0106	0.538963
Meta-training cohort 238	GSM340679.x	1.90967
Meta-training cohort 239	TCGA_UY_A9PF	3.30616
Meta-training cohort 239	TCGA_UY_A9PF	3.30616
Meta-training cohort 240	BLCA_Nac_18	1.75024
Meta-training cohort 241	GSM786492	1.67301
Meta-training cohort 242	GSM340755.x	1.54205
Meta-training cohort 244	FR_290_U133_2.CEL	2.12775
Meta-training cohort 247	FR_31_U133_2.CEL	2.92908
Meta-training cohort 248	U1082	0.934678
Meta-training cohort 249	TCGA_XF_A9SY	3.21375
Meta-training cohort 249	TCGA_XF_A9SY	3.21375
Meta-training cohort 250	GSM786504	2.89169
Meta-training cohort 251	FR_7_U133_2.CEL	2.56194
Meta-training cohort 252	TCGA_BT_A20N	2.8261
Meta-training cohort 252	TCGA_BT_A20N	2.8261
Meta-training cohort 253	GSM806911	1.71916
Meta-training cohort 254	FR_172_U133_2.CEL	2.10667
Meta-training cohort 256	GSM786562	2.27581
Meta-training cohort 258	GSM340642.y	1.53557
Meta-training cohort 259	U1435	1.06568
Meta-training cohort 261	GSM3699770	0.598208
Meta-training cohort 264	U0028	0.909736
Meta-training cohort 266	GSM340616	0.882074
Meta-training cohort 267	TCGA_KQ_A41O	3.42025
Meta-training cohort 267	TCGA_KQ_A41O	3.42025
Meta-training cohort 268	U0928	0.443237
Meta-training cohort 269	GSM806884	1.10945
Meta-training cohort 27	BLCA_Nac_126	2.89768
Meta-training cohort 271	U1284	1.78818
Meta-training cohort 274	U1182	0.588454
Meta-training cohort 275	FR_68_U133_2.CEL	3.00919
Meta-training cohort 276	FR_8_U133_2.CEL	2.78366
Meta-training cohort 278	BLCA_Cx_118	2.44875
Meta-training cohort 28	U0117	0.908324
Meta-training cohort 280	GSM2301816	1.55345
Meta-training cohort 281	GSM814179	2.21101
Meta-training cohort 282	GSM340716.x	1.56686
Meta-training cohort 283	U1230	0.935829
Meta-training cohort 284	TCGA_G2_AA3D	3.02535
Meta-training cohort 284	TCGA_G2_AA3D	3.02535
Meta-training cohort 285	U0159	0.945029
Meta-training cohort 286	TCGA_DK_AA74	2.77997
Meta-training cohort 286	TCGA_DK_AA74	2.77997
Meta-training cohort 287	GSM786495	2.81503
Meta-training cohort 288	GSM340749	1.12487
Meta-training cohort 289	TCGA_HQ_A5ND	3.68078
Meta-training cohort 289	TCGA_HQ_A5ND	3.68078
Meta-training cohort 290	GSM340652.y	1.53126
Meta-training cohort 293	TCGA_H4_A2HO	2.29613
Meta-training cohort 293	TCGA_H4_A2HO	2.29613
Meta-training cohort 294	GSM340621.x	1.13867
Meta-training cohort 295	GSM806853	1.69965
Meta-training cohort 297	GSM340740	1.59043
Meta-training cohort 298	GSM814168	1.66182
Meta-training cohort 300	GSM814338	0.588454
Meta-training cohort 301	BLCA_Nac_145	2.94738
Meta-training cohort 302	TCGA_G2_A2EJ	2.06839
Meta-training cohort 302	TCGA_G2_A2EJ	2.06839
Meta-training cohort 304	GSM806901	1.64687
Meta-training cohort 305	GSM814316	1.65972
Meta-training cohort 306	U0087	1.1797
Meta-training cohort 307	GSM786535	3.13017
Meta-training cohort 309	U0092	1.57426
Meta-training cohort 310	GSM2301811	1.80863
Meta-training cohort 311	GSM806899	0.928911
Meta-training cohort 312	GSM340763	2.84159
Meta-training cohort 313	GSM340754.x	1.15913
Meta-training cohort 314	GSM814133	1.13999
Meta-training cohort 315	TCGA_C4_A0EZ	3.56296
Meta-training cohort 315	TCGA_C4_A0EZ	3.56296
Meta-training cohort 316	GSM3699763	1.19948
Meta-training cohort 317	GSM340688.x	1.49087
Meta-training cohort 318	U1431	1.47348
Meta-training cohort 319	GSM340707	0.513369
Meta-training cohort 32	U0026	0.88684
Meta-training cohort 320	BLCA_Cx_198	2.78006
Meta-training cohort 322	FR_76_U133_2.CEL	2.9285
Meta-training cohort 323	TCGA_CU_A5W6	2.71993
Meta-training cohort 323	TCGA_CU_A5W6	2.71993
Meta-training cohort 327	GSM340709	2.13299
Meta-training cohort 328	GSM806895	1.55489
Meta-training cohort 330	U0666	1.0666
Meta-training cohort 332	FR_188_U133_2.CEL	3.15183
Meta-training cohort 333	U0083	1.04945
Meta-training cohort 334	U0015	1.13483
Meta-training cohort 335	GSM340665	3.42747
Meta-training cohort 336	GSM2301903	2.12754
Meta-training cohort 337	U0273	0.588454
Meta-training cohort 338	GSM786533	2.75584
Meta-training cohort 34	GSM786578	2.91788
Meta-training cohort 340	GSM814065	1.09051
Meta-training cohort 343	U0646	0.515425
Meta-training cohort 344	GSM340605.x	1.65784
Meta-training cohort 345	U0466	0.604187
Meta-training cohort 348	TCGA_DK_A3IQ	3.18359
Meta-training cohort 348	TCGA_DK_A3IQ	3.18359
Meta-training cohort 349	GSM806854	0.572292
Meta-training cohort 350	FR_6_U133_2.CEL	3.099
Meta-training cohort 352	U0993	1.08137
Meta-training cohort 353	GSM806891	1.47532
Meta-training cohort 354	GSM814263	0.900742
Meta-training cohort 355	U1309	0.895024
Meta-training cohort 356	U0156	0.954225
Meta-training cohort 359	GSM786534	1.63795
Meta-training cohort 362	U0670	1.13015
[truncated: 368 more rows]

## Sheet: Table S9
Table S9: Drug Response based on TCGA cohort.
Drug	Better response group	IC50
KIN001.135	high	5.1e-11
AZD.0530	high	9.9e-10
Bexarotene	high	1.4e-09
AZD6482	high	1.5e-09
Pazopanib	high	2e-09
Midostaurin	high	3.1e-09
Dasatinib	high	2.1e-08
BX.795	high	3.3e-08
NVP.TAE684	high	3.6e-07
A.770041	high	3.8e-07
Imatinib	high	6.2e-07
PHA.665752	high	1.2e-06
GSK269962A	high	2.7e-06
CMK	high	1.1e-05
Bicalutamide	high	1.5e-05
Embelin	high	5.5e-05
GNF.2	high	9.7e-05
AP.24534	high	9.8e-05
Parthenolide	high	0.00015
GDC0941	high	0.00021
AG.014699	high	0.00063
OSI.906	high	0.00069
NU.7441	high	0.00096
BMS.754807	high	0.0013
CGP.60474	high	0.0016
AZD7762	high	0.0041
BMS.536924	high	0.011
Cisplatin	high	0.012
KU.559333	high	0.012
JNJ.26854165	high	0.013
BMS.509744	high	0.014
CHIR.99021	high	0.017
Docetaxel	high	0.017
AICAR	high	0.023
Sunitinib	high	0.024
Bortezomib	high	0.027
PF.02341066	high	0.029
FTI.277	high	0.036
Methotrexate	low	3.2e-14
Metformin	low	9.9e-12
Salubrinal	low	8.6e-08
Tipifarnib	low	9e-07
ATRA	low	2.7e-06
ABT.888	low	2.9e-06
MK.2206	low	1.3e-05
SB590885	low	1.5e-05
BIRB.0796	low	4.5e-05
Roscovitine	low	4.5e-05
BIBW2992	low	0.00026
GW.441756	low	0.00027
EHT.1864	low	0.00045
Mitomycin.C	low	0.00049
Vinorelbine	low	0.00052
Nuutlin.3a	low	0.00076
Bosutinib	low	0.0015
Pyrimethamine	low	0.0026
PAC.1	low	0.0033
Gefitinib	low	0.0074
Gemcitabine	low	0.011
Sorafenib	low	0.014
PD.0332991	low	0.021
Etoposide	low	0.024
AZD6244	low	0.025
Lenalidomide	low	0.026
